# Supplementary material for: Diachronic Atlas of Comparative Linguistics (DiACL)—A database for ancient language typology
Source: PLoS One. 2018 Oct 11;13(10):e0205313. doi: 10.1371/journal.pone.0205313 (PMC6181559; doi:10.1371/journal.pone.0205313)
Supplement: S1 Appendix — (XLSX) [file pone.0205313.s001.xlsx]

## Sheet: Blad1
Language Name	ISO 693-3	Alternative names	Note	WGS84 Latitude/Longitude	Language area	Focus area	Reliability	Time frame
Albanian (Tosk)	als	Arnaut, Shkip, Shqip, Shqiperë, Skchip, Tosk, Zhgabe		40.4469; 19.9883	Europe	Eurasia	Modern language	1500 – 2000
Angloromani	rme			53.7795; -2.35527	Europe	Eurasia	Modern language	1750 – 2000
Ashkun	ask	Ashkund, Ashkuni, Wamais, Wamayi		35.2559; 70.7911	Central Asia	Eurasia	Modern language	1750 – 2000
Assamese	asm	Asambe, Asami, Asamiya		26.1435; 91.7902	South Asia	Eurasia	Modern language	1750 – 2000
Avestan	ave	Avesta, Pazend		31.7071; 55.9499	Middle East	Eurasia	Dead (well documented)	-1250 – -750
Basque East	baq	Euskara, Euskera, Vascuence			Europe	Eurasia	Modern language	1750-2000
Basque West	baq	Euskara, Euskera, Eskuara			Europe	Eurasia	Modern language	1750-2000
Batsbi	bbl	Bac, Batsaw, Batsba, Bats, Batsbiitsy, Batsi, Tsova-Tush, Tush		41.8574; 45.6474	Europe	Eurasia	Modern language	1750 – 2000
Bengali	ben	Bangala, Bangla, Bangla-Bhasa		22.5669; 88.3612	South Asia	Eurasia	Modern language	1750 – 2000
Breton	bre	Brezhoneg		47.9956; -4.10286	Europe	Eurasia	Modern language	1500 – 2000
Bulgarian	bul	Balgarski		42.6986; 23.3535	Europe	Eurasia	Modern language	1500 – 2000
Catalan	cat	Català, Catalan-Valencian-Balear, Catalonian, Catalán		41.3792; 2.17964	Europe	Eurasia	Modern language	1500 – 2000
Chechen	che	Galancho, Nokchiin Muott, Nokhchiin		43.316; 45.685	Europe	Eurasia	Modern language	1750 – 2000
Classical Greek	grc	Ancient Greek		37.6969; 23.9992	Europe	Eurasia	Dead (well documented)	-500 – 0
Cornish	cor	Curnoack, Kernewek, Kernowek		50.1918; -5.56752	Europe	Eurasia	Modern language	1500 – 1750
Croatian	hrv	Hrvatski		45.8135; 15.9927	Europe	Eurasia	Modern language	1500 – 2000
Czech	cze	Bohemian, Čeština		50.0712; 14.4681	Europe	Eurasia	Modern language	1500 – 2000
Danish	dan	Dansk, Rigsdansk		55.6799; 12.5832	Europe	Eurasia	Modern language	1500 – 2000
Dutch	nld	Hollands, Nederlands, Flemish		52.3744; 4.89813	Europe	Eurasia	Modern language	1500 – 2000
Elfdalian	ovd	Dalecarlian		61.2259; 14.0405	Europe	Eurasia	Modern language	1500 – 2000
English	eng			51.4977; -0.100059	Europe	Eurasia	Modern language	1500 – 2000
Faroese	fao	Føroyskt		62.0098; -6.77332	Europe	Eurasia	Modern language	1500 – 2000
Finnish	fin	Suomi		60.173°N, 24.941°E	Europe	Eurasia	Modern language	1500 – 2000
French	fre	Français		48.8545; 2.34786	Europe	Eurasia	Modern language	1500 – 2000
Frisian	fry	Fries, Frysk		53.2039; 5.7956	Europe	Eurasia	Modern language	1500 – 2000
Friulian	fur	Frioulan, Frioulian, Friulano, Furlan, Priulian		46.127; 13.485	Europe	Eurasia	Modern language	1500 – 2000
Georgian	geo	Common Kartvelian, Gruzinski, Kartuli		41.6195; 44.8248	Europe	Eurasia	Modern language	1500 – 2000
German	ger	Deutsch, Tedesco		52.5208; 13.4091	Europe	Eurasia	Modern language	1500 – 2000
Gilaki	glk	Gelaki, Gilani, Guilaki, Guilani		37.5261; 49.284	Central Asia	Eurasia	Modern language	1750 – 2000
Gothic	got			53.0429; 20.1993	Europe	Eurasia	Dead (well documented)	0 – 750
Gujarati	guj	Gujerathi, Gujerati, Gujrathi		22.4446; 72.1399	South Asia	Eurasia	Modern language	1750 – 2000
Hindi	hin	Khadi Boli, Khari Boli		28.6253; 77.225	South Asia	Eurasia	Modern language	1750 – 2000
Hittite	hit			40.014; 34.6212	Middle East	Eurasia	Dead (well documented)	-1800 – -1200
Icelandic	ice	Íslenska		64.1442; -21.9397	Europe	Eurasia	Modern language	1750 – 2000
Irish	gle	Erse, Gaeilge, Gaelic Irish		53.2444; -9.3011	Europe	Eurasia	Modern language	1500 – 2000
Italian	ita	Italiano		43.116; 12.3851	Europe	Eurasia	Modern language	1500 – 2000
Kabardian	kbd	Beslenei, East Circassian, Kabard, Kabardino-Cherkes, Kabardo-Cherkess, Upper Circassian		43.3689; 43.6606	Europe	Eurasia	Modern language	1750 – 2000
Karachay-Balkar	krc	Balkarian, Balqar, Karacaylar, Karachai, Karachaitsy, Karachay, Karachayla		43.603673; 43.108678	Europe	Eurasia	Modern language	1750 – 2000
Kashmiri	kas	Cashmeeree, Cashmiri, Kacmiri, Kaschemiri, Keshur, Koshur		34.323; 75.9392	South Asia	Eurasia	Modern language	1500 – 2000
Kati	bsh	Kamkata-viri		35.8; 71.3146	Central Asia	Eurasia	Modern language	1750 – 2000
Kazakh	kaz	Kaisak, Kazak, Kosach, Qazaq		51.157; 71.46	Central Asia	Eurasia	Modern language	1750 – 2000
Khowar	khw	Arniya, Chitrali, Chitrari, Citrali, Kashkari, Khawar, Patu, Qashqari		36.458; 72.5166	South Asia	Eurasia	Modern language	1750 – 2000
Khwarshi	khv	Khvarshi, Atl’ilqo, Khvarshin, Xvarshi		42.3195; 46.0594	Europe	Eurasia	Modern language	1750 – 2000
Konkani	knn	Bankoti, Central Konkan, Concorinum, Cugani, Kathodi, Katvadi, Konkan Standard, Konkanese, Konkani Mangalorean, Kunabi, North Konkan		19.2621; 72.8711	South Asia	Eurasia	Modern language	1750 – 2000
Kryz	kry	Dzek, Dzhek, Dzheki, Katsy, Kryc, Kryts, Kryzy		41.1088; 48.0861	Europe	Eurasia	Modern language	1750 – 2000
Kurdish (Kurmanji)	kmr	Kermancî, Kirmancî, Kurdi, Kurdî, Kurmancî, Kurmanji		37.7881; 43.8227	Middle East	Eurasia	Modern language	1500 – 2000
Kurdish (Sorani)	ckb	Kurdi		35.8212; 45.7285	Middle East	Eurasia	Modern language	1500 – 2000
Ladin	lld	Dolomite, Rhaeto-Romance		46.6574; 11.9238	Europe	Eurasia	Modern language	1500 – 2000
Latin	lat	Latina		41.8902; 12.4923	Europe	Eurasia	Dead (well documented)	-500 – 750
Latvian	lav	“Lettisch” (pej.), “Lettish” (pej.)		56.915; 24.1133	Europe	Eurasia	Modern language	1500 – 2000
Laz	lzz	Chan, Chanuri, Chanzan, Laze, Zan		41.4622; 41.5697	Europe	Eurasia	Modern language	1750 – 2000
Lezgian	lez	Kiurinsty, Lezgi, Lezghi, Lezgin		41.5538; 48.039	Europe	Eurasia	Modern language	1750 – 2000
Lithuanian	lit	Lietuvi, Lietuviskai, Litauische, Litewski, Litovskiy		54.6802; 25.2559	Europe	Eurasia	Modern language	1500 – 2000
Low German	nds	Mennonite German, Mennoniten Platt, Plautdietsch		53.932; 9.48865	Europe	Eurasia	Modern language	1500 – 2000
Luwian	xlu	Luvian		36.6206; 36.7883	Middle East	Eurasia	Dead (well documented)	-1500 – -500
Maithili	mai	Apabhramsa, Bihari, Maitili, Maitli, Methli, Tirahutia, Tirhuti, Tirhutia		26.0754; 86.1555	South Asia	Eurasia	Modern language	1500 – 2000
Maldivian	div	Dhivehi, Divehi, Divehi Bas, Divehli, Mali, Malikh, Malki		4.17191; 73.5119	South Asia	Eurasia	Modern language	1750 – 2000
Manx	glv	Gaelg, Gailck, Manx Gaelic		54.152; -4.48466	Europe	Eurasia	Dead (well documented)	1500 – 2000
Marathi	mar	Maharashtra, Maharathi, Malhatee, Marthi, Muruthu		19.387; 75.4947	South Asia	Eurasia	Modern language	1750 – 2000
Megrelian	xmf	Mingrelian		42.3738; 41.9373	Europe	Eurasia	Modern language	1750 – 2000
Middle Breton	xbm			47.2079; -1.53247	Europe	Eurasia	Dead (well documented)	1000 – 1500
Middle Dutch	dum			52.2131; 5.95919	Europe	Eurasia	Dead (well documented)	1000 – 1500
Middle English	enm			51.3136; -0.758622	Europe	Eurasia	Dead (well documented)	1000 – 1500
Middle Greek	grc			41.0586; 28.9976	Europe	Eurasia	Dead (well documented)	500 – 1500
Middle High German	gmh			48.7427; 9.7174	Europe	Eurasia	Dead (well documented)	1000 – 1500
Middle Irish	mga	Middle Gaelic		52.6589; -8.63441	Europe	Eurasia	Dead (well documented)	1000 – 1500
Middle Low German	gml			53.8678; 10.685	Europe	Eurasia	Dead (well documented)	1250 – 1500
Middle Persian	pal	Pahlavi		32.647; 51.6759	Middle East	Eurasia	Dead (well documented)	250 – 1250
Middle Welsh	wlm			52.2404; -3.38002	Europe	Eurasia	Dead (well documented)	1000 – 1500
Modern Armenian	arm	Armjanski Yazyk, Ena, Ermeni Dili, Ermenice, Somkhuri		40.1474; 44.5272	Europe	Eurasia	Modern language	1750 – 2000
Modern Greek	gre	Ellinika, Graecae, Grec, Greco, Neo-Hellenic, Romaic		38.0286; 23.6943	Europe	Eurasia	Modern language	1500 – 2000
Nepali	npi	Eastern Pahadi, Gorkhali, Gurkhali, Khaskura, Nepalese, Parbate		26.6597; 89.2436	South Asia	Eurasia	Modern language	1750 – 2000
Northern Sami	sme	“Lapp” (pej.), North Sámi, “Northern Lappish” (pej.), Northern Saami, “Norwegian Lapp” (pej.), Saami, Same, Sámegiella, Samic		20.094891; 68.085278	Europe	Eurasia	Modern language	1750 – 2000
Norwegian (Bokmål)	nob	Norsk		59.9128; 10.7408	Europe	Eurasia	Modern language	1500 – 2000
Norwegian (Nynorsk)	nno	Norsk		60.331; 5.07536	Europe	Eurasia	Modern language	1500 – 2000
Old Church Slavonic	chu			50.4155; 30.4532	Europe	Eurasia	Dead (well documented)	750 – 1250
Old Dutch	odt			52.0909; 5.12326	Europe	Eurasia	Dead (well documented)	750 – 1000
Old English	ang			51.0607; -1.31416	Europe	Eurasia	Dead (well documented)	500 – 1000
Old French	fro			48.8545; 2.34786	Europe	Eurasia	Dead (well documented)	750 – 1250
Old Frisian	ofs			53.2157; 6.56774	Europe	Eurasia	Dead (well documented)	750 – 1500
Old Georgian	oge			41.8401; 44.7086	Europe	Eurasia	Dead (well documented)	500 – 1250
Old High German	goh			49.7955; 9.96262	Europe	Eurasia	Dead (well documented)	750 – 1000
Old Irish	sga			53.7268; -6.87383	Europe	Eurasia	Dead (well documented)	500 – 1000
Old Italian				43.7763; 11.2492	Europe	Eurasia	Dead (well documented)	1000 – 1500
Old Norse	non			63.427; 10.3975	Europe	Eurasia	Dead (well documented)	750 – 1500
Old Persian	peo			29.9355; 52.8912	Middle East	Eurasia	Dead (well documented)	-500 – 250
Old Portuguese				41.1582; -8.62914	Europe	Eurasia	Dead (well documented)	750 – 1500
Old Provençal	pro			43.4268; 6.22252	Europe	Eurasia	Dead (well documented)	750 – 1250
Old Prussian	prg	Prussian		54.4363; 19.9008	Europe	Eurasia	Dead (fragmentary)	1250 – 1750
Old Russian	orv	Old East Slavic, Rusian		58.5214; 31.2753	Europe	Eurasia	Dead (well documented)	1000 – 1500
Old Saxon	osx			53.0759; 8.80604	Europe	Eurasia	Dead (well documented)	750 – 1250
Old Spanish	osp			39.8571; -4.02367	Europe	Eurasia	Dead (well documented)	1000 – 1500
Old Swedish				58.4811; 16.3219	Europe	Eurasia	Dead (well documented)	1000 – 1500
Oriya	ory	Odisha, Odri, Odrum, Oliya, Uriya, Utkali, Vadiya, Yudhia		20.6085; 86.2784	South Asia	Eurasia	Modern language	1750 – 2000
Ossetian (Iron)	oss	Osetin, Ossetic		43.0438; 44.6757	Europe	Eurasia	Modern language	1500 – 2000
Pali	pli			27.6179; 83.0004	South Asia	Eurasia	Dead (well documented)	-250 – 250
Parachi	prc			34.8329; 69.7026	Central Asia	Eurasia	Modern language	1750 – 2000
Pashto	pus			31.4329; 68.1888	South Asia	Eurasia	Modern language	1750 – 2000
Persian	per	New Persian, Parsi, Persian, West Persian, Farsi		32.7353; 55.748	Middle East	Eurasia	Modern language	1250 – 2000
Polish	pol	Polnisch, Polski		52.2379; 20.994	Europe	Eurasia	Modern language	1750 – 2000
Portuguese	por	Português		38.708; -9.13513	Europe	Eurasia	Modern language	1500 – 2000
Prakrit	pra			25.3791; 84.728	South Asia	Eurasia	Dead (well documented)	-250 – 250
Prasun	prn	Parun, Paruni, Prasuni, Veron, Verou, Veruni, Wasi-Veri		35.3366; 70.7416	Central Asia	Eurasia	Modern language	1750 – 2000
Provençal	oci	Occitan, Occitani		43.4268; 6.22252	Europe	Eurasia	Modern language	1500 – 2000
Punjabi	pan	Lahanda, Lahnda, Lahndi, Lahori, Majhi, Gurmukhi, Gurumukhi, Panjabi		31.5366; 74.3494	South Asia	Eurasia	Modern language	1500 – 2000
Romani (Arli)	rmn			42.9703; 19.8812	Europe	Eurasia	Modern language	1750 – 2000
Romani (Bugurdži)	rmn	Rabadži, Arabadži, and Kovač(k)i		42.1181; 21.2227	Europe	Eurasia	Modern language	1750 – 2000
Romani (Burgenland)				47.1932; 16.3775	Europe	Eurasia	Modern language	1750 – 2000
Romani (Kale)	rmf	Fíntika Rómma, Gypsy, Finnish Romani		60.9721; 21.471	Europe	Eurasia	Modern language	1750 – 2000
Romani (Kelderash)	rmy	Kalderaš		47.1877; 22.4951	Europe	Eurasia	Modern language	1750 – 2000
Romani (Lovara)	rmy	Lovari		47.4015; 23.0902	Europe	Eurasia	Modern language	1750 – 2000
Romani (Sepečides)	rmn			38.3928; 27.1317	Europe	Eurasia	Modern language	1750 – 2000
Romani (Sinte)	rmo	Sinti, Rómanes, Sintitikes		51.4992; 10.2034	Europe	Eurasia	Modern language	1750 – 2000
Romanian	rum	Daco-Rumanian, Moldavian, Rumanian		44.4275; 26.0864	Europe	Eurasia	Modern language	1500 – 2000
Romansh	roh	Rhaeto-Romance, Rheto-Romance, Romanche, Romansch, Rumantsch		46.4968; 9.83834	Europe	Eurasia	Modern language	1500 – 2000
Russian	rus	Russki		55.6776; 37.6484	Europe	Eurasia	Modern language	1500 – 2000
Sanskrit	san			23.5114; 76.2861	South Asia	Eurasia	Dead (well documented)	-500 – 0
Sardinian	srd	Central Sardinian, Logudorese, Sard, Sardarese		40.3175; 9.32737	Europe	Eurasia	Modern language	1750 – 2000
Scandoromani	rmu			59.4813; 13.1586	Europe	Eurasia	Modern language	1750 – 2000
Scottish Gaelic	gla	Gaelic, Gàidhlig, Scots Gaelic		57.1628; -7.36897	Europe	Eurasia	Modern language	1500 – 2000
Serbian	srp	Montenegrin		44.8013; 20.4722	Europe	Eurasia	Modern language	1500 – 2000
Shughni	sgh	Shugnan-Rushan		38.3896; 71.503	Central Asia	Eurasia	Modern language	1750 – 2000
Sicilian	scn	Calabro-Sicilian, Sicilianu, Siculu		38.1151; 13.3683	Europe	Eurasia	Modern language	1500 – 2000
Sindhi	snd			23.2535; 69.6748	South Asia	Eurasia	Modern language	1500 – 2000
Sinhalese	sin	Cingalese, Singhala, Singhalese, Sinhalese		6.93511; 79.8564	South Asia	Eurasia	Modern language	1250 – 2000
Slovene	slv	Slovenian, Slovenscina		46.0506; 14.5082	Europe	Eurasia	Modern language	1500 – 2000
Sogdian	sog			39.6466; 66.9627	Central Asia	Eurasia	Dead (well documented)	0 – 1000
Spanish	spa	Castellano, Castilian, Español		40.4169; -3.70348	Europe	Eurasia	Modern language	1500 – 2000
Svan	sva	Svanuri		42.9924; 42.5231	Europe	Eurasia	Modern language	1750 – 2000
Swedish	swe	Ruotsi, Svenska		59.7382; 17.4387	Europe	Eurasia	Modern language	1500 – 2000
Swiss German	gsw	Alemanic, Alemannisch, Schwyzerdütsch		47.3689; 8.53835	Europe	Eurasia	Modern language	1500 – 2000
Tajik	tgk	Galcha, Tadzhik, Tajik, Tajiki Persian, Tojiki		38.6635; 70.3426	Central Asia	Eurasia	Modern language	1750 – 2000
Talysh	tly	Talesh, Talish, Talyshi		38.8542; 48.73	Middle East	Eurasia	Modern language	1750 – 2000
Tocharian A	xto			41.7603; 86.1548	Central Asia	Eurasia	Dead (well documented)	500 – 1000
Tocharian B	txb			41.6455; 81.5144	Central Asia	Eurasia	Dead (well documented)	250 – 1250
Turkish	tur	Anatolian, Türkçe, Türkisch		32.835488; 39.965536	Middle East	Eurasia	Modern language	1750 – 2000
Turkmen	tuk	Trukhmen, Trukhmeny, Turkmani, Turkmanian, Turkmenler, Turkomans		58.501778; 38.08043	Central Asia	Eurasia	Modern language	1750 – 2000
Ukrainian	ukr	Ukrainian		50.4495; 30.5254	Europe	Eurasia	Modern language	1500 – 2000
Upper Sorbian	hsb	Haut Sorabe, Hornjoserbski, Hornoserbski, Obersorbisch, Upper Lusatian, Wendish		51.1799; 14.4254	Europe	Eurasia	Modern language	1500 – 2000
Urdu	urd	Bihari		33.6811; 73.0184	South Asia	Eurasia	Modern language	1750 – 2000
Uyghur	uig	Uighuir, Uighur, Uiguir, Uigur, Uygur, Weiwu’er, Wiga		76.013287; 39.600087	Central Asia	Eurasia	Modern language	1750 – 2000
Uzbek	uzb	Usbeki, Uzbak, Uzbeki, Özbek		69.182676; 41.389027	Central Asia	Eurasia	Modern language	1750 – 2000
Wakhi	wbl	Khik, Khikwar, Vakhan, Wakhani, Wakhigi		37.2195; 72.7601	Central Asia	Eurasia	Modern language	1750 – 2000
Walloon	wln	Wallon		50.4645; 4.86538	Europe	Eurasia	Modern language	1500 – 2000
Welsh	wel	Cymraeg		52.9264; -4.38518	Europe	Eurasia	Modern language	1500 – 2000
Yiddish	ydd	Judeo-German, Yiddish		49.853; 24.0312	Europe	Eurasia	Modern language	1500 – 2000
