# Supplementary material for: Diachronic Atlas of Comparative Linguistics (DiACL)—A database for ancient language typology
Source: PLoS One. 2018 Oct 11;13(10):e0205313. doi: 10.1371/journal.pone.0205313 (PMC6181559; doi:10.1371/journal.pone.0205313)
Supplement: S2 Appendix — (XLSX) [file pone.0205313.s002.xlsx]

## Sheet: Blad2
GRID	FEATURE	FEATURE: ATTESTED COMBINATIONS OF 1/0/NA IN DATA	FEATURE: DESCRIPTION	VARIANT	VARIANT: DESCRIPTION	VARIANT ID
Word order	Adpositions	4	Do adpositions normally occur before or after the noun?	Prep	Does the language have a substantial set of prepositions? E.g. English in the house	213
Word order	Adpositions		Do adpositions normally occur before or after the noun?	Post	Does the language have a substantial set of postpositions?	214
Word order	Noun-adjective	3	Do adjectives normally occur before or after the noun?	NA	Do most adjectives occur after the noun?	215
Word order	Noun-adjective		Do adjectives normally occur before or after the noun?	AN	Do most adjectives occur before the noun?	216
Word order	Noun-relative clause	4	Do relative clauses normally occur before or after the noun?	NRel	Do most relative clauses occur after the noun?	217
Word order	Noun-relative clause		Do relative clauses normally occur before or after the noun?	RelN	Do most relative clauses occur before the noun?	218
Word order	Noun-possessor	3	Do possessors normally occur before or after the noun?	N-Poss	Do most possessors occur after the noun they possess? The possessor should be an animate noun, and neither a proper name nor a pronoun!	219
Word order	Noun-possessor		Do possessors normally occur before or after the noun?	Poss-N	Do most possessors occur before the noun they possess? The possessor should be an animate noun, and neither a proper name nor a pronoun!	220
Word order	WH-element	4	What is the position of the WH-question word?	WH-initial	Is the WH-question word always obligatorily the first element in a question?	221
Word order	WH-element		What is the position of the WH-question word?	WH-V	Does the WH-question word always immediately precede the verb (i.e., stand directly before the verb)?	222
Word order	Main clause	5	What is the canonical (neutral) word order in a main clause?	SVO	What is the canonical (neutral) word order in a main clause? NB: V2 languages like Swe and Ger do NOT count as SVO even though SVO is most frequent.	223
Word order	Main clause		What is the canonical (neutral) word order in a main clause?	V2	V2 implies that initial adverb triggers V-SUBJ word order (Swedish, German etc.).	224
Word order	Main clause		What is the canonical (neutral) word order in a main clause?	VSO	What is the canonical (neutral) word order in a main clause?	225
Word order	Main clause		What is the canonical (neutral) word order in a main clause?	SOV	What is the canonical (neutral) word order in a main clause?	226
Word order	Subordinate clause	5	What is the canonical (neutral) word order in a subordinate clause?	SVO	What is the canonical (neutral) word order in a subordinate clause? NB: V2 languages like Swe and Ger do NOT count as SVO even though SVO is most frequent.	227
Word order	Subordinate clause		What is the canonical (neutral) word order in a subordinate clause?	V2	V2 implies that initial adverb triggers V-SUBJ word order (Swedish, German etc.).	228
Word order	Subordinate clause		What is the canonical (neutral) word order in a subordinate clause?	VSO	What is the canonical (neutral) word order in a subordinate clause?	229
Word order	Subordinate clause		What is the canonical (neutral) word order in a subordinate clause?	SOV	What is the canonical (neutral) word order in a subordinate clause?	230
Word order	Infinitive	4	Does the object normally occur before or after an infinitive? E.g.: to make pancakes (VO) Pfannkuchen machen (OV)	VO		231
Word order	Infinitive		Does the object normally occur before or after an infinitive? E.g.: to make pancakes (VO) Pfannkuchen machen (OV)	OV		232
Word order	Participle	4	Does the object normally occur before or after a participle? E.g.: making pancakes (VO) Pfannkuchen machend (OV)	VO		233
Word order	Participle		Does the object normally occur before or after a participle? E.g.: making pancakes (VO) Pfannkuchen machend (OV)	OV		234
Word order	Clitic pronouns finite verb	5	Does the clitic object pronoun normally occur before or after a finite verb? E.g.: Je les fais. (OV) If a language does not have clitic object pronouns, it would be 0 in both OV and VO.	VO		235
Word order	Clitic pronouns finite verb		Does the clitic object pronoun normally occur before or after a finite verb? E.g.: Je les fais. (OV) If a language does not have clitic object pronouns, it would be 0 in both OV and VO.	OV		236
Word order	Clitic pronouns finite verb		Does the clitic object pronoun normally occur before or after a finite verb? E.g.: Je les fais. (OV) If a language does not have clitic object pronouns, it would be 0 in both OV and VO.	2nd position	Does the clitic pronoun always occur in 2nd position, not specifically before or after the verb? (Wackernagel position)	237
Word order	Clitic pronouns infinitive	5	Does the clitic object pronoun normally occur before or after an infinitive? E.g.: Je veux les faire. (OV) If a language does not have clitic object pronouns, it would be 0 in both OV and VO.	VO		238
Word order	Clitic pronouns infinitive		Does the clitic object pronoun normally occur before or after an infinitive? E.g.: Je veux les faire. (OV) If a language does not have clitic object pronouns, it would be 0 in both OV and VO.	OV		239
Word order	Clitic pronouns infinitive		Does the clitic object pronoun normally occur before or after an infinitive? E.g.: Je veux les faire. (OV) If a language does not have clitic object pronouns, it would be 0 in both OV and VO.	2nd position	Does the clitic pronoun always occur in 2nd position, not specifically before or after the verb?	240
Word order	Clitic pronouns participle	5	Does the clitic object pronoun normally occur before or after a participle? E.g.: En les faisant... (OV) If a language does not have clitic object pronouns, it would be 0 in both OV and VO.	VO		241
Word order	Clitic pronouns participle		Does the clitic object pronoun normally occur before or after a participle? E.g.: En les faisant... (OV) If a language does not have clitic object pronouns, it would be 0 in both OV and VO.	OV		242
Word order	Clitic pronouns participle		Does the clitic object pronoun normally occur before or after a participle? E.g.: En les faisant... (OV) If a language does not have clitic object pronouns, it would be 0 in both OV and VO.	2nd position	Does the clitic pronoun always occur in 2nd position, not specifically before or after the verb?	243
Nominal morphology	Nominal case	47	What is the realization of case at nouns (nominal heads)?	O-case	Are there different noun forms for agent and object case? (English: 0 (no cases) Russian: 1 (different noun forms for accusative and nominative) Basque: 1 (different noun forms for ergative and absolutive)	244
Nominal morphology	Nominal case		What is the realization of case at nouns (nominal heads)?	DAT	Is there a specific case form for the recipient, which is different from the case form of, e.g., the object? (E.g. The man gives a book (O) to the child (DAT))	245
Nominal morphology	Nominal case		What is the realization of case at nouns (nominal heads)?	GEN	Is there a special case form to express genitive, which is different from the agent/object case?	246
Nominal morphology	Nominal case		What is the realization of case at nouns (nominal heads)?	GEN/DAT	Is there a special noun form to express genitive, which is not the same as dative (recipient) case?	247
Nominal morphology	Nominal case		What is the realization of case at nouns (nominal heads)?	VOC	Is there a special noun form to express vocative which is not the same as agent or object case?	248
Nominal morphology	Nominal case		What is the realization of case at nouns (nominal heads)?	OBL-Cases	Are there any cases besides agent, object, genitive, dative, and vocative? (E.g., local cases)	249
Nominal morphology	Nominal case		What is the realization of case at nouns (nominal heads)?	>7 Cases	Are there more than 7 cases?	250
Nominal morphology	Nominal case		What is the realization of case at nouns (nominal heads)?	AGGL.CASE	Are there cases which are visibly agglutinative, i.e., built up by several distinct, segmentable affixes?	251
Nominal morphology	Nominal case		What is the realization of case at nouns (nominal heads)?	AGGL.CASE.NR	Are plural cases formed by combining an (infixed) plural affix and a case affix in an agglutinative manner?	252
Nominal morphology	Pronominal case	20	What is the realization of case at pronouns (pronominal heads)? Mainly 1st and 2nd person pronouns, ignoring 3rd person pronouns (which often come from demonstratives).	Aâ‰ O	In pronouns, is the marking different for the case of the agent and object?	253
Nominal morphology	Pronominal case		What is the realization of case at pronouns (pronominal heads)? Mainly 1st and 2nd person pronouns, ignoring 3rd person pronouns (which often come from demonstratives).	DATâ‰ O	In pronouns, is the marking different for the case of the recipient and the object?	254
Nominal morphology	Pronominal case		What is the realization of case at pronouns (pronominal heads)? Mainly 1st and 2nd person pronouns, ignoring 3rd person pronouns (which often come from demonstratives).	VOC	See Nominal case	255
Nominal morphology	Pronominal case		What is the realization of case at pronouns (pronominal heads)? Mainly 1st and 2nd person pronouns, ignoring 3rd person pronouns (which often come from demonstratives).	OBL-Cases	See Nominal case	256
Nominal morphology	Pronominal case		What is the realization of case at pronouns (pronominal heads)? Mainly 1st and 2nd person pronouns, ignoring 3rd person pronouns (which often come from demonstratives).	>7 Cases	See Nominal case	257
Nominal morphology	Pronominal case		What is the realization of case at pronouns (pronominal heads)? Mainly 1st and 2nd person pronouns, ignoring 3rd person pronouns (which often come from demonstratives).	AGGL.CASE	See Nominal case	258
Nominal morphology	Pronominal case		What is the realization of case at pronouns (pronominal heads)? Mainly 1st and 2nd person pronouns, ignoring 3rd person pronouns (which often come from demonstratives).	AGGL.CASE.NR	See Nominal case	259
Nominal morphology	Case marking	9	On which elements of the NP is the case marking obligatory?	CASE-LAST	Is the case marking obligatory on the last element of the NP (i.e., it is only realized once in the NP, even if it consists of several elements)?	260
Nominal morphology	Case marking		On which elements of the NP is the case marking obligatory?	CASE-FIRST	Is the case marking obligatory on the first element of the NP (i.e., it is only realized once in the NP, even if it consists of several elements)?	261
Nominal morphology	Case marking		On which elements of the NP is the case marking obligatory?	CASE-N	Is the case marking obligatory realized on the noun?	262
Nominal morphology	Case marking		On which elements of the NP is the case marking obligatory?	CASE-ADJ	Is the case marking obligatory on the adjective?	263
Nominal morphology	Case marking		On which elements of the NP is the case marking obligatory?	CASE-ART	Is the case marking realized on the article?	264
Nominal morphology	Gender / noun class	9	How is gender / noun class realized in the language?	M/F	Is there an obligatory gender distinction between masculine and feminine realized on an agreeing article or adjective? Can be either on the adjective (Russian) or on both the article and the adjective (German), or even on a verb (as in some NE Caucasian languages).	265
Nominal morphology	Gender / noun class		How is gender / noun class realized in the language?	NEUTR	Is there a special neutral gender for nouns realized on an agreeing article, adjective or verb?	266
Nominal morphology	Gender / noun class		How is gender / noun class realized in the language?	ANIM	Is there a special noun class for non-human animates realized on an agreeing article, adjective or verb?	267
Nominal morphology	Gender / noun class		How is gender / noun class realized in the language?	<5 GENDER	Are there more than 5 noun classes (or genders)?	268
Nominal morphology	Definiteness marking	13	How is definiteness marking realized in the language?	DEF-ART	Is there a special word class of definite articles which occur in NPs without adjectives? (E.g.: German, English but not Swedish)	269
Nominal morphology	Definiteness marking		How is definiteness marking realized in the language?	N-DEF	Is there a suffix for definiteness on the noun? (E.g.: Swedish but not English!)	270
Nominal morphology	Definiteness marking		How is definiteness marking realized in the language?	ADJ-DEF	Is there a suffix for definiteness on the adjective? This includes cases when the ADJ has a different form in definite and indefinite NPs (Swe "det stora huset", Ger "das groÃŸe Haus").	271
Nominal morphology	Definiteness marking		How is definiteness marking realized in the language?	DEF-LAST	Is the definiteness marking obligatory on the last element of the NP (so it is only realized once in the NP, even if it consists of several elements)? If there is no definiteness marking at all, it will be 0!	272
Nominal morphology	Definiteness marking		How is definiteness marking realized in the language?	DEF-FIRST	Is the definiteness marking obligatory on the first element of the NP (so it is only realized once in the NP, even if it consists of several elements)? If there is no definiteness marking at all, it will be 0!	273
Nominal morphology	Gender agreement	2	How is gender agreement realized in the language?	PRED-ADJ	Does a predicative adjective agree with the subject of the clause in gender?	274
Nominal morphology	Preposition agreement	2	How is preposition agreement realized in the language?	PREP-PRON-AGR	Can a preposition agree in person with its object?	275
Verbal morphology	Simple PAST, A	6	In simple past, how is verbal agreement realized with respect to the agent?	PST:A-AGR-FULL	In simple past: does the verb crossreference the agent in all persons /numbers?	276
Verbal morphology	Simple PAST, A		In simple past, how is verbal agreement realized with respect to the agent?	PST:NO-A-AGR	In simple past: does the verb not crossreference the agent on the verb at all (e.g., Swedish)?	277
Verbal morphology	Simple PAST, A		In simple past, how is verbal agreement realized with respect to the agent?	PST:A-Gender-AGR	In simple past, does the verb agree in gender with the subject of a transitive verb? (e.g., Russian, Polish).	278
Verbal morphology	Simple PAST, O	5	In simple past, how is verbal agreement realized with respect to the object?	PST:O-AGR-FULL	In simple past: does the verb crossreference the object in all persons /numbers?	279
Verbal morphology	Simple PAST, O		In simple past, how is verbal agreement realized with respect to the object?	PST:NO-O-AGR	In simple past: does the verb not crossreference the object on the verb at all (e.g., Swedish, English, Russian)?	280
Verbal morphology	Simple PAST, O		In simple past, how is verbal agreement realized with respect to the object?	PST:O-Gender-AGR	In simple past, does the verb agree in gender with the object?	281
Verbal morphology	Simple PAST, DAT	4	In simple past, how is verbal agreement realized with respect to the indirect object of ditransitive verbs?	PST:DAT-AGR-FULL	In simple past: does the verb crossreference the dative in all persons /numbers?	282
Verbal morphology	Simple PAST, DAT		In simple past, how is verbal agreement realized with respect to the indirect object of ditransitive verbs?	PST:NO-DAT-AGR	In simple past: does the verb not crossreference the dative on the verb at all (e.g., Swedish, English, Russian)	283
Verbal morphology	Simple PAST, DAT		In simple past, how is verbal agreement realized with respect to the indirect object of ditransitive verbs?	PST:DAT-Gender-AGR	In simple past, does the verb agree in gender with the indirect object of a ditransitive verb?	284
Verbal morphology	Present progressive, A	5	In present progressive: how is verbal agreement realized with respect to the agent?	PROG:A-AGR-FULL	In present progressive: does the verb crossreference the agent in all persons /numbers?	285
Verbal morphology	Present progressive, A		In present progressive: how is verbal agreement realized with respect to the agent?	PROG:NO-A-AGR	In present progressive: does the verb not crossreference the agent on the verb at all (e.g., Swedish)	286
Verbal morphology	Present progressive, A		In present progressive: how is verbal agreement realized with respect to the agent?	PROG:A-Gender-AGR	In present progressive, does the verb agree in gender with the subject of a transitive verb?	287
Verbal morphology	Present progressive, O	4	In present progressive, how is verbal agreement organized with respect to the object?	PROG:O-AGR-FULL	In present progressive: does the verb crossreference the object in all persons /numbers?	288
Verbal morphology	Present progressive, O		In present progressive, how is verbal agreement organized with respect to the object?	PROG:NO-O-AGR	In present progressive: does the verb not crossreference the object on the verb at all (e.g. Swedish, Russian)?	289
Verbal morphology	Present progressive, O		In present progressive, how is verbal agreement organized with respect to the object?	PROG:O-Gender-AGR	In present progressive, does the verb agree in gender with the object of a transitive verb?	290
Verbal morphology	Present progressive, DAT	3	In present progressive, how is verbal agreement organized with respect to the indirect object of ditransitive verbs?	PROG:DAT-AGR-FULL	Iin present progressive: does the verb crossreference the indirect object of a ditransitive verb in all persons /numbers?	291
Verbal morphology	Present progressive, DAT		In present progressive, how is verbal agreement organized with respect to the indirect object of ditransitive verbs?	PROG:NO-DAT-AGR	In present progressive: does the verb not crossreference the indirect object of ditransitive verbs at all (e.g. Swedish, English, Russian)?	292
Verbal morphology	Present progressive, DAT		In present progressive, how is verbal agreement organized with respect to the indirect object of ditransitive verbs?	PROG:DAT-Gender-AGR	In the present progressive, does the verb agree in gender with the indirect object of a ditransitive verb?	293
Verbal morphology	Allocutive agreement	2	Does the verb agree with the receiver (the person one is speaking to) without the speaker being an argument in the sentence (allocutive agreement, probably no for all languages but Basque!)	ALLOC	Does the verb agree with the receiver (the person one is speaking to) without the speaker being an argument in the sentence (allocutive agreement, probably no for all languages but Basque!)	294
Tense	Future	16	How is future realized in the language?	FUT.AUX	Is there a future formed by an auxiliary? (E.g., will in English?	295
Tense	Future		How is future realized in the language?	PERF.FUT	Is there a future formed by using the perfective aspect? (0 if the language does not have verbal aspects! E.g., Russian, Georgian)	296
Tense	Future		How is future realized in the language?	FUT.Participle	Is there a future formed by a participle? (E.g., Armenian, Basque)	297
Tense	Future		How is future realized in the language?	FUT.Particle	Is there a future formed by a particle preceding a finite verb? (E.g., Albanian)	298
Tense	Future		How is future realized in the language?	FUT.Synth	Is there a synthetical future? (E.g., French, Spanish)	299
Tense	Continous present	4	How is present progressive realized in the language?	Present	Is there a synthetic present in progressive function?	300
Tense	Continous present		How is present progressive realized in the language?	Progressive present	Is there a progressive present form constructed by combining a present participle with a finite auxiliary verb?	301
Alignment	Noun: Simple Past	6	In simple past: how is the marking of subject and object of nouns realized?	N:PST:A=O?	In simple past: Is the noun form for A the same as for O? Ie: Does the noun look the same when it is subject of a transitive clause than when it is object of a transitive clause?	302
Alignment	Noun: Simple Past		In simple past: how is the marking of subject and object of nouns realized?	N:PST:A=Sa?	In simple past:Is the noun form for A the same as for Sa? Ie: Does the noun look the same when it is subject of a transitive clause as when it is subject of an agentive intransitive verb such as "work" or "dance"?	303
Alignment	Noun: Simple Past		In simple past: how is the marking of subject and object of nouns realized?	N:PST: O=So?	In simple past: Is the noun form for O the same as for So? Ie: Does the noun look the same when it is object of a transitive clause as when it is subject of an unaccusative verb such as "fall" or "die"?	304
Alignment	Noun: Simple Past		In simple past: how is the marking of subject and object of nouns realized?	N:PST:Sa=So?	In simple past: Does a noun bear the same case form when it is Sa (subject of e.g. work) or So (subject of e.g. fall or die)? Ie: There does not exist a split into stative and active intransitive verbs.	305
Alignment	Noun: Present Progressive	5	In present progressive: how is the marking of subject and object of nouns realized?	N:PROG:A=O?	In present progressive: Is the noun form for A the same as for O? I.e.: Does the noun look the same when it is subject of a transitive clause and when it is object of a transitive clause?	306
Alignment	Noun: Present Progressive		In present progressive: how is the marking of subject and object of nouns realized?	N:PROG:A=Sa?	In present progressive:Is the noun form for A the same as for Sa? I.e.: Does the noun look the same when it is subject of a transitive clause and when it is subject of an agentive intransitive verb such as "work" or "dance"?	307
Alignment	Noun: Present Progressive		In present progressive: how is the marking of subject and object of nouns realized?	N:PROG:O=So?	In present progressive: Is the noun form for O the same as for So? I.e.: Does the noun look the same when it is object of a transitive clause and when it is subject of an unaccusative verb such as "fall" or "die"?	308
Alignment	Noun: Present Progressive		In present progressive: how is the marking of subject and object of nouns realized?	N:PROG:Sa=So?	In present progressive: does a noun bear the same case form when it is Sa (subject of e.g., "work") or So (subject of e.g., "fall" or "die")? I.e.: The language does not have a split between stative and active intransitive verbs.	309
Alignment	Pronoun: Simple Past	6	In present progressive: how is the marking of subject and object of pronouns realized?	P:PST:A=O?	In simple past: Is the pronoun form for A the same as for O? I.e.: Does the pronoun look the same when it is subject of a transitive clause than when it is object of a transitive clause?	310
Alignment	Pronoun: Simple Past		In present progressive: how is the marking of subject and object of pronouns realized?	P:PST:A=Sa?	In simple past: Is the pronoun form for A the same as for Sa? I.e.: Does the pronoun look the same when it is subject of a transitive clause than when it is subject of an agentive intransitive verb such as "work" or "dance"?	311
Alignment	Pronoun: Simple Past		In present progressive: how is the marking of subject and object of pronouns realized?	P:PST: O=So?	In simple past: Is the pronoun form for O the same as for So? I.e.: Does the pronoun look the same when it is object of a transitive clause than when it is subject of an unaccusative verb such as "fall" or "die"?	312
Alignment	Pronoun: Simple Past		In present progressive: how is the marking of subject and object of pronouns realized?	P:PST:Sa=So?	In simple past: Does the pronoun bear the same case form when it is Sa (subject of e.g. work) or So (subject of e.g. fall or die)? I.e.: There does not exist a split into stative and active intransitive verbs.	313
Alignment	Pronoun: Present Progressive	4	In present progressive: how is the marking of subject and object of pronouns realized?	P:PROG:A=O?	In present progressive: Is the pronoun form for A the same as for O? I.e.: Does the pronoun look the same when it is subject of a transitive clause than when it is object of a transitive clause?	314
Alignment	Pronoun: Present Progressive		In present progressive: how is the marking of subject and object of pronouns realized?	P:PROG:A=Sa?	In present progressive:Is the pronoun form for A the same as for Sa? I.e.: Does the pronoun look the same when it is subject of a transitive clause as when it is subject of an agentive intransitive verb such as "work" or "dance"?	315
Alignment	Pronoun: Present Progressive		In present progressive: how is the marking of subject and object of pronouns realized?	P:PROG: O=So?	In present progressive: Is the pronoun form for O the same as for So? I.e.: Does the pronoun look the same when it is object of a transitive clause than when it is subject of an unaccusative verb such as "die" or "fall"?	316
Alignment	Pronoun: Present Progressive		In present progressive: how is the marking of subject and object of pronouns realized?	P:PROG:Sa=So?	In present progressive: Does a pronoun bear the same case form when it is Sa (subject of e.g. work) or So (subject of e.g. fall or die)? Ie: There does not exist a split into stative and active intransitive verbs.	317
Alignment	Verb: Simple Past	7	In simple past, how is alignment realized on the verb?	V:PST:A=O?	In simple past: Is the verb affix for A the same as for O? I.e.: Does the verb look the same when it refers to the subject of a transitive clause than when it refers to the object of a transitive clause? If there is no O-marking on the verb, but there is an S-marking, the answer would be no, they do not look the same. (e.g., German, Russian) If there is neither an O, nor an A marking, like in Swe…	318
Alignment	Verb: Simple Past		In simple past, how is alignment realized on the verb?	V:PST:A=Sa?	In simple past: Is the verb affix for A the same as for Sa? I.e.: Does the verb look the same when it refers to subject of a transitive clause than when it refers to subject of an agentive intransitive verb like "work" or "dance"?	319
Alignment	Verb: Simple Past		In simple past, how is alignment realized on the verb?	V:PST:O=So?	In simple past: Is the verb affix for O the same as for So? I.e.: Does the verb look the same when it refers to the object of a transitive clause as when it refers to the subject of an unaccusative verb (such as "fall" or "die")?	320
Alignment	Verb: Simple Past		In simple past, how is alignment realized on the verb?	V:PST:Sa=So?	In simple past: Is the verb affix the same for Sa (subject of e.g. work) as or So (subject of e.g. fall or die)? I.e., does the verb agreement affix look the same regardless of whether the verb is "work" or "die" (as in German: "arbeitete-st", "starb-st"). I.e.: There does not exist a split into unaccusative and agentive intransitive verbs.	321
Alignment	Verb: Present Progressive	6	In present progressive, how is alignment realized on the verb?	V:PROG:A=O?	In present progressive: Is the verb affix for A the same as for O? Ie: Does the verb look the same when it refers to the subject of a transitive clause than when it refers to the object of a transitive clause? If there is no O-marking on the verb, but there is an S-marking, the answer would be no, they do not look the same. (e.g. German, Russian) If there is neither an O, nor an A marking like in…	322
Alignment	Verb: Present Progressive		In present progressive, how is alignment realized on the verb?	V:PROG:A=Sa?	In present progressive:Is the verb affix for A the same as for Sa? Ie: Does the verb look the same when it refers to subject of a transitive clause as when it refers to subject of an agentive intransitive verb such as "work"?	323
Alignment	Verb: Present Progressive		In present progressive, how is alignment realized on the verb?	V:PROG: O=So?	In present progressive: Is the verb affix the same for O as for So? Ie: Does the verb look the same when it refers to the object of a transitive clause as when it refers to the subject of an unaccusative verb (such as "fall" or "die")?	324
Alignment	Verb: Present Progressive		In present progressive, how is alignment realized on the verb?	V:PROG:Sa=So?	In present progressive: Is the verb affix the same for Sa (subject of e.g. "work") as or So (subject of e.g. "fall" or "die")? I.e. does the verb agreement affix look the same regardless of whether the verb is "work" or "die" (as in German: arbeite-t, stirb-t). I.e.: There does not exist a split into unaccusative and agentive intransitive verbs.	325
Alignment	Compare PROG-PAST	5	What is the marking relation between subject and object in present progressive and simple past?	PROG_So=PAST_So	Does the subject of e.g. die or fall bear the same case in both progressive present and simple past? (the answer for e.g., Megrelian would be no)	326
Alignment	Compare PROG-PAST		What is the marking relation between subject and object in present progressive and simple past?	PROG_A=PAST_O	Does the subject of a transitive verb in the present progressive bear the same case form as the object of a transitive verb in the simple past? (e.g. as in Georgian)	327
Alignment	Compare PROG-PAST		What is the marking relation between subject and object in present progressive and simple past?	PAST_A=PROG_O	Does the subject of a transitive verb in the simple past bear the same case form as the object of a verb in the present progressive? (e.g., Kurdish)	328
Alignment	Reflexive pronoun in transitive clause	3	What is the alignment of reflexive pronouns?	REFL-ref-A	In a transitive clause, can O be a reflexive which refers back to A (as in English "herself", Swedish "sig")?	329
Alignment	Reflexive pronoun in transitive clause		What is the alignment of reflexive pronouns?	REFL-ref-O	In a transitive clause, can A be a reflexive which refers back to O (as appears to be the case in some Caucasian languages)?	330
