# Supplementary material for: Diachronic Atlas of Comparative Linguistics (DiACL)—A database for ancient language typology
Source: PLoS One. 2018 Oct 11;13(10):e0205313. doi: 10.1371/journal.pone.0205313 (PMC6181559; doi:10.1371/journal.pone.0205313)
Supplement: S4 Appendix — (XLSX) [file pone.0205313.s004.xlsx]

## Sheet: Blad1
feat1	feat2	countx	county	countxy	pmi
Verbal.morphologypresent.progressive..DATPROG.DAT.AGR.FULL	Verbal.morphologypresent.progressive..OPROG.O.AGR.FULL	9	7	7	2.77278
Verbal.morphologypresent.progressive..OPROG.O.AGR.FULL	Verbal.morphologysimple.PAST..DATPST.DAT.AGR.FULL	7	10	7	2.66742
Verbal.morphologypresent.progressive..DATPROG.DAT.AGR.FULL	Verbal.morphologysimple.PAST..DATPST.DAT.AGR.FULL	9	10	9	2.66742
Word.orderClitic.pronouns.finite.verb2nd.position	Word.orderClitic.pronouns.infinitive2nd.position	12	12	12	2.49192
Word.orderClitic.pronouns.finite.verb2nd.position	Word.orderClitic.pronouns.participle2nd.position	12	12	12	2.47813
ALIGNMENTVerb..Present.ProgressiveV.PROG.A.O.	Verbal.morphologypresent.progressive..APROG.NO.A.AGR	9	11	8	2.47475
Word.orderClitic.pronouns.infinitive2nd.position	Word.orderClitic.pronouns.participle2nd.position	12	12	12	2.4713
ALIGNMENTVerb..Present.ProgressiveV.PROG..O.So.	ALIGNMENTVerb..Present.ProgressiveV.PROG.A.O.	13	9	9	2.43226
Verbal.morphologypresent.progressive..APROG.A.Gender.AGR	Verbal.morphologysimple.PAST..OPST.O.Gender.AGR	5	13	5	2.42548
Verbal.morphologypresent.progressive..OPROG.O.AGR.FULL	Verbal.morphologysimple.PAST..OPST.O.AGR.FULL	7	14	7	2.33777
Verbal.morphologypresent.progressive..DATPROG.DAT.AGR.FULL	Verbal.morphologysimple.PAST..OPST.O.AGR.FULL	9	14	9	2.33777
Verbal.morphologysimple.PAST..DATPST.DAT.AGR.FULL	Verbal.morphologysimple.PAST..OPST.O.AGR.FULL	10	14	10	2.33777
ALIGNMENTVerb..Present.ProgressiveV.PROG..O.So.	Verbal.morphologypresent.progressive..APROG.NO.A.AGR	13	11	10	2.33017
Word.orderMain.clausesVSO	Word.orderSubordinate.clauseVSO	12	16	12	2.19044
ALIGNMENTVerb..Present.ProgressiveV.PROG.A.O.	ALIGNMENTVerb..Simple.PastV.PST.A.O.	9	16	8	2.10006
ALIGNMENTVerb..Simple.PastV.PST.A.O.	Verbal.morphologypresent.progressive..APROG.NO.A.AGR	16	11	8	1.89261
ALIGNMENTPronoun..Simple.PastP.PST.A.O.	Verbal.morphologypresent.progressive..OPROG.O.AGR.FULL	19	7	6	1.88502
ALIGNMENTPronoun..Present.ProgressiveP.PROG.A.O.	ALIGNMENTPronoun..Simple.PastP.PST.A.O.	22	19	18	1.8521
TENSEFuturePERF.FUT	Verbal.morphologysimple.PAST..APST.A.Gender.AGR	14	10	6	1.82012
ALIGNMENTPronoun..Present.ProgressiveP.PROG..O.So.	ALIGNMENTPronoun..Present.ProgressiveP.PROG.A.O.	24	22	22	1.81916
ALIGNMENTPronoun..Present.ProgressiveP.PROG.A.O.	Verbal.morphologysimple.PAST..DATPST.DAT.AGR.FULL	22	10	9	1.7872
ALIGNMENTPronoun..Present.ProgressiveP.PROG.A.O.	Verbal.morphologypresent.progressive..DATPROG.DAT.AGR.FULL	22	9	8	1.77478
ALIGNMENTPronoun..Present.ProgressiveP.PROG..O.So.	ALIGNMENTPronoun..Simple.PastP.PST.A.O.	24	19	18	1.76509
ALIGNMENTPronoun..Present.ProgressiveP.PROG.A.O.	Verbal.morphologypresent.progressive..OPROG.O.AGR.FULL	22	7	6	1.73841
ALIGNMENTVerb..Present.ProgressiveV.PROG..O.So.	ALIGNMENTVerb..Simple.PastV.PST.A.O.	13	16	8	1.73234
Word.orderClitic.pronouns.infinitiveVO	Word.orderClitic.pronouns.participleVO	20	24	19	1.71999
ALIGNMENTPronoun..Present.ProgressiveP.PROG..O.So.	Verbal.morphologysimple.PAST..DATPST.DAT.AGR.FULL	24	10	9	1.70019
ALIGNMENTPronoun..Present.ProgressiveP.PROG..O.So.	Verbal.morphologypresent.progressive..DATPROG.DAT.AGR.FULL	24	9	8	1.68777
ALIGNMENTPronoun..Simple.PastP.PST.A.O.	Verbal.morphologysimple.PAST..DATPST.DAT.AGR.FULL	19	10	7	1.68249
ALIGNMENTPronoun..Present.ProgressiveP.PROG..O.So.	Verbal.morphologypresent.progressive..OPROG.O.AGR.FULL	24	7	6	1.6514
TENSEFuturePERF.FUT	Verbal.morphologysimple.PAST..DATPST.DAT.AGR.FULL	14	10	5	1.6378
ALIGNMENTPronoun..Simple.PastP.PST.A.O.	Verbal.morphologypresent.progressive..DATPROG.DAT.AGR.FULL	19	9	6	1.6337
Nominal.morphologyNominal.cases.7.Cases	Nominal.morphologyPronominal.Cases.7.Cases	26	11	10	1.6302
Word.orderClitic.pronouns.infinitiveOV	Word.orderClitic.pronouns.participleOV	21	28	21	1.61713
ALIGNMENTCompare.PROG.PASTPAST_A.PROG_O	ALIGNMENTCompare.PROG.PASTPROG_A.PST_O	11	30	11	1.59601
ALIGNMENTCompare.PROG.PASTPROG_A.PST_O	Verbal.morphologypresent.progressive..APROG.A.Gender.AGR	30	5	5	1.58924
ALIGNMENTPronoun..Present.ProgressiveP.PROG.A.O.	Verbal.morphologysimple.PAST..OPST.O.AGR.FULL	22	14	10	1.56292
ALIGNMENTVerb..Simple.PastV.PST.A.O.	Verbal.morphologysimple.PAST..APST.NO.A.AGR	16	29	15	1.5586
Nominal.morphologyPreposition.agreementPRON.AGR	Word.orderMain.clausesVSO	15	12	6	1.54785
Nominal.morphologyPreposition.agreementPRON.AGR	Word.orderSubordinate.clauseVSO	15	16	8	1.52723
ALIGNMENTVerb..Present.ProgressiveV.PROG.A.O.	Verbal.morphologysimple.PAST..APST.NO.A.AGR	9	29	8	1.51213
ALIGNMENTPronoun..Simple.PastP.PST.A.O.	Word.orderMain.clausesVSO	19	12	7	1.507
ALIGNMENTPronoun..Present.ProgressiveP.PROG..O.So.	Verbal.morphologysimple.PAST..OPST.O.AGR.FULL	24	14	10	1.47591
Nominal.morphologyPronominal.CasesAGGL.CASE	Nominal.morphologyPronominal.CasesAGGL.CASE.NR	34	15	15	1.46407
ALIGNMENTVerb..Simple.PastV.PST..O.So.	ALIGNMENTVerb..Simple.PastV.PST.A.O.	32	16	15	1.45338
ALIGNMENTCompare.PROG.PASTPAST_A.PROG_O	ALIGNMENTPronoun..Simple.PastP.PST.A.O.	11	19	6	1.44664
ALIGNMENTVerb..Present.ProgressiveV.PROG..O.So.	ALIGNMENTVerb..Simple.PastV.PST..O.So.	13	32	12	1.44465
Word.orderMain.clausesV2	Word.orderSubordinate.clauseV2	34	9	9	1.43667
ALIGNMENTCompare.PROG.PASTPROG_A.PST_O	Verbal.morphologysimple.PAST..OPST.O.Gender.AGR	30	13	11	1.42896
ALIGNMENTVerb..Simple.PastV.PST..O.So.	Verbal.morphologypresent.progressive..APROG.NO.A.AGR	32	11	10	1.42261
Verbal.morphologypresent.progressive..APROG.NO.A.AGR	Verbal.morphologysimple.PAST..APST.NO.A.AGR	11	29	9	1.42247
ALIGNMENTVerb..Present.ProgressiveV.PROG.A.O.	ALIGNMENTVerb..Simple.PastV.PST..O.So.	9	32	8	1.40691
ALIGNMENTPronoun..Simple.PastP.PST..O.So.	Verbal.morphologysimple.PAST..OPST.O.Gender.AGR	37	13	13	1.38629
ALIGNMENTPronoun..Simple.PastP.PST..O.So.	ALIGNMENTPronoun..Simple.PastP.PST.A.O.	37	19	19	1.38629
ALIGNMENTPronoun..Present.ProgressiveP.PROG.A.O.	ALIGNMENTPronoun..Simple.PastP.PST..O.So.	22	37	22	1.38629
ALIGNMENTPronoun..Present.ProgressiveP.PROG..O.So.	ALIGNMENTPronoun..Simple.PastP.PST..O.So.	24	37	24	1.38629
ALIGNMENTPronoun..Simple.PastP.PST.A.O.	Nominal.morphologyPreposition.agreementPRON.AGR	19	15	8	1.38278
ALIGNMENTPronoun..Simple.PastP.PST..O.So.	Verbal.morphologypresent.progressive..APROG.A.Gender.AGR	37	5	5	1.37951
ALIGNMENTVerb..Simple.PastV.PST..O.So.	Verbal.morphologysimple.PAST..APST.NO.A.AGR	32	29	25	1.37628
Nominal.morphologyDefiniteness.markingDEF.LAST	Word.orderNoun.relative.clauseRelN	9	23	6	1.3717
Verbal.morphologysimple.PAST..APST.NO.A.AGR	Verbal.morphologysimple.PAST..OPST.O.Gender.AGR	29	13	10	1.36755
ALIGNMENTVerb..Simple.PastV.PST..O.So.	Verbal.morphologysimple.PAST..OPST.O.Gender.AGR	32	13	11	1.35764
ALIGNMENTPronoun..Simple.PastP.PST.A.O.	Verbal.morphologysimple.PAST..OPST.O.AGR.FULL	19	14	7	1.35285
ALIGNMENTCompare.PROG.PASTPROG_A.PST_O	Verbal.morphologysimple.PAST..OPST.O.AGR.FULL	30	14	11	1.34807
Nominal.morphologyCase.markingCASE.LAST	Nominal.morphologyDefiniteness.markingDEF.LAST	34	9	8	1.34629
ALIGNMENTPronoun..Simple.PastP.PST.A.O.	Word.orderSubordinate.clauseVSO	19	16	8	1.33223
TENSEFuturePERF.FUT	Verbal.morphologysimple.PAST..OPST.O.AGR.FULL	14	14	5	1.30815
ALIGNMENTPronoun..Simple.PastP.PST..O.So.	Verbal.morphologysimple.PAST..OPST.O.AGR.FULL	37	14	13	1.30541
ALIGNMENTCompare.PROG.PASTPAST_A.PROG_O	ALIGNMENTPronoun..Present.ProgressiveP.PROG.A.O.	11	22	6	1.30003
ALIGNMENTCompare.PROG.PASTPROG_A.PST_O	ALIGNMENTPronoun..Simple.PastP.PST..O.So.	30	37	27	1.28093
ALIGNMENTPronoun..Simple.PastP.PST..O.So.	Verbal.morphologysimple.PAST..DATPST.DAT.AGR.FULL	37	10	9	1.26733
ALIGNMENTVerb..Present.ProgressiveV.PROG..O.So.	Verbal.morphologysimple.PAST..APST.NO.A.AGR	13	29	9	1.26219
ALIGNMENTPronoun..Simple.PastP.PST..O.So.	Verbal.morphologypresent.progressive..DATPROG.DAT.AGR.FULL	37	9	8	1.25491
Nominal.morphologyDefiniteness.markingDEF.LAST	Nominal.morphologyDefiniteness.markingN.DEF	9	33	7	1.24261
ALIGNMENTCompare.PROG.PASTPROG_A.PST_O	Verbal.morphologysimple.PAST..DATPST.DAT.AGR.FULL	30	10	7	1.22573
Word.orderClitic.pronouns.finite.verbOV	Word.orderClitic.pronouns.participleOV	30	28	20	1.22536
ALIGNMENTPronoun..Simple.PastP.PST..O.So.	Verbal.morphologypresent.progressive..OPROG.O.AGR.FULL	37	7	6	1.21854
ALIGNMENTCompare.PROG.PASTPAST_A.PROG_O	ALIGNMENTPronoun..Present.ProgressiveP.PROG..O.So.	11	24	6	1.21302
ALIGNMENTCompare.PROG.PASTPROG_A.PST_O	ALIGNMENTPronoun..Present.ProgressiveP.PROG.A.O.	30	22	15	1.21302
ALIGNMENTPronoun..Present.ProgressiveP.PROG.A.O.	Word.orderMain.clausesVSO	22	12	6	1.20624
ALIGNMENTPronoun..Simple.PastP.PST.A.O.	TENSEFuturePERF.FUT	19	14	6	1.19187
Nominal.morphologyNominal.casesAGGL.CASE	Nominal.morphologyPronominal.CasesAGGL.CASE.NR	45	15	15	1.19055
ALIGNMENTNoun..Present.ProgressiveN.PROG.A.O.	ALIGNMENTNoun..Simple.PastN.PST.A.O.	44	40	39	1.1877
ALIGNMENTCompare.PROG.PASTPROG_A.PST_O	Verbal.morphologypresent.progressive..DATPROG.DAT.AGR.FULL	30	9	6	1.17694
Word.orderClitic.pronouns.finite.verbOV	Word.orderClitic.pronouns.infinitiveOV	30	21	14	1.16329
Nominal.morphologyCase.markingCASE.ART	Word.orderSubordinate.clauseV2	45	9	9	1.14267
ALIGNMENTCompare.PROG.PASTPROG_A.PST_O	ALIGNMENTPronoun..Present.ProgressiveP.PROG..O.So.	30	24	15	1.12601
Word.orderClitic.pronouns.finite.verbVO	Word.orderClitic.pronouns.participleVO	29	24	15	1.12573
ALIGNMENTPronoun..Present.ProgressiveP.PROG..O.So.	Word.orderMain.clausesVSO	24	12	6	1.11923
Nominal.morphologyNominal.cases.7.Cases	Nominal.morphologyPronominal.CasesAGGL.CASE.NR	26	15	8	1.11051
ALIGNMENTCompare.PROG.PASTPAST_A.PROG_O	ALIGNMENTNoun..Simple.PastN.PST.A.O.	11	40	9	1.10766
ALIGNMENTNoun..Present.ProgressiveN.PROG..O.So.	ALIGNMENTNoun..Present.ProgressiveN.PROG.A.O.	49	44	44	1.10539
ALIGNMENTPronoun..Present.ProgressiveP.PROG.A.O.	Nominal.morphologyPreposition.agreementPRON.AGR	22	15	7	1.10264
ALIGNMENTPronoun..Simple.PastP.PST.A.O.	ALIGNMENTVerb..Present.ProgressiveV.PROG..O.So.	19	13	5	1.09726
Word.orderClitic.pronouns.finite.verbVO	Word.orderClitic.pronouns.infinitiveVO	29	20	12	1.09183
ALIGNMENTNoun..Present.ProgressiveN.PROG..O.So.	ALIGNMENTNoun..Simple.PastN.PST.A.O.	49	40	39	1.08007
Nominal.morphologyNominal.casesAGG.CASE.NR	Nominal.morphologyPronominal.CasesAGGL.CASE.NR	50	15	15	1.07158
ALIGNMENTCompare.PROG.PASTPAST_A.PROG_O	ALIGNMENTPronoun..Simple.PastP.PST..O.So.	11	37	8	1.06784
ALIGNMENTNoun..Simple.PastN.PST.A.O.	ALIGNMENTVerb..Present.ProgressiveV.PROG.A.O.	40	9	7	1.05702
ALIGNMENTPronoun..Present.ProgressiveP.PROG.A.O.	Word.orderSubordinate.clauseVSO	22	16	7	1.05209
ALIGNMENTCompare.PROG.PASTPROG_A.PST_O	ALIGNMENTPronoun..Simple.PastP.PST.A.O.	30	19	11	1.04947
ALIGNMENTPronoun..Present.ProgressiveP.PROG..O.So.	ALIGNMENTVerb..Present.ProgressiveV.PROG..O.So.	24	13	6	1.04597
ALIGNMENTPronoun..Present.ProgressiveP.PROG.A.O.	TENSEFuturePERF.FUT	22	14	6	1.04527
Word.orderClitic.pronouns.finite.verbVO	Word.orderClitic.pronouns.infinitiveOV	29	21	12	1.04304
Nominal.morphologyNominal.cases.7.Cases	Verbal.morphologysimple.PAST..DATPST.DAT.AGR.FULL	26	10	5	1.03236
ALIGNMENTVerb..Present.ProgressiveV.PROG.A.O.	Nominal.morphologyDefiniteness.markingADJ.DEF	9	35	6	1.02962
ALIGNMENTPronoun..Present.ProgressiveP.PROG..O.So.	Nominal.morphologyGender...Noun.classANIM	24	11	5	1.02392
ALIGNMENTPronoun..Present.ProgressiveP.PROG..O.So.	Verbal.morphologypresent.progressive..APROG.NO.A.AGR	24	11	5	1.02392
ALIGNMENTCompare.PROG.PASTPAST_A.PROG_O	Verbal.morphologysimple.PAST..APST.NO.A.AGR	11	29	6	1.02378
ALIGNMENTPronoun..Present.ProgressiveP.PROG..O.So.	Nominal.morphologyPronominal.Cases.7.Cases	24	11	5	1.0171
ALIGNMENTPronoun..Present.ProgressiveP.PROG..O.So.	Nominal.morphologyPreposition.agreementPRON.AGR	24	15	7	1.01563
ALIGNMENTNoun..Simple.PastN.PST.A.O.	ALIGNMENTVerb..Simple.PastV.PST.A.O.	40	16	12	1.01387
ALIGNMENTCompare.PROG.PASTPROG_A.PST_O	ALIGNMENTVerb..Simple.PastV.PST..O.So.	30	32	18	1.01387
ALIGNMENTCompare.PROG.PASTPAST_A.PROG_O	ALIGNMENTNoun..Present.ProgressiveN.PROG.A.O.	11	44	9	1.01235
ALIGNMENTCompare.PROG.PASTPROG_A.PST_O	Nominal.morphologyDefiniteness.markingDEF.LAST	30	9	5	1.00823
Word.orderClitic.pronouns.finite.verbVO	Word.orderSubordinate.clauseV2	29	9	5	1.00795
ALIGNMENTPronoun..Simple.PastP.PST..O.So.	ALIGNMENTVerb..Simple.PastV.PST..O.So.	37	32	22	1.00482
Verbal.morphologysimple.PAST..OPST.O.Gender.AGR	Word.orderNoun.relative.clauseRelN	13	23	6	1.00397
ALIGNMENTNoun..Present.ProgressiveN.PROG..O.So.	Verbal.morphologypresent.progressive..APROG.NO.A.AGR	49	11	10	1.0033
Nominal.morphologyDefiniteness.markingADJ.DEF	Word.orderSubordinate.clauseV2	35	9	6	1.00222
ALIGNMENTCompare.PROG.PASTPROG_A.PST_O	Verbal.morphologysimple.PAST..APST.NO.A.AGR	30	29	16	1.00131
Nominal.morphologyDefiniteness.markingADJ.DEF	Word.orderMain.clausesV2	35	34	22	0.992987
Nominal.morphologyDefiniteness.markingDEF.FIRST	Word.orderClitic.pronouns.infinitiveVO	34	20	13	0.992191
Nominal.morphologyNominal.casesAGGL.CASE	Nominal.morphologyPronominal.CasesAGGL.CASE	45	34	28	0.989614
ALIGNMENTNoun..Simple.PastN.PST.A.O.	Verbal.morphologypresent.progressive..APROG.NO.A.AGR	40	11	8	0.983099
Nominal.morphologyGender...Noun.classANIM	Word.orderNoun.relative.clauseRelN	11	23	5	0.981924
Word.orderClitic.pronouns.finite.verbOV	Word.orderClitic.pronouns.infinitiveVO	30	20	11	0.97092
Nominal.morphologyGender...Noun.classANIM	Nominal.morphologyNominal.casesAGG.CASE.NR	11	50	10	0.969494
ALIGNMENTPronoun..Present.ProgressiveP.PROG..O.So.	Word.orderSubordinate.clauseVSO	24	16	7	0.965081
Nominal.morphologyNominal.casesAGG.CASE.NR	Nominal.morphologyPronominal.Cases.7.Cases	50	11	10	0.962668
ALIGNMENTPronoun..Present.ProgressiveP.PROG..O.So.	TENSEFuturePERF.FUT	24	14	6	0.958255
Verbal.morphologysimple.PAST..OPST.O.Gender.AGR	Word.orderAdpositionsPost	13	57	13	0.954161
Nominal.morphologyNominal.casesAGG.CASE.NR	Verbal.morphologysimple.PAST..DATPST.DAT.AGR.FULL	50	10	9	0.952617
Nominal.morphologyNominal.cases.7.Cases	Nominal.morphologyNominal.casesAGG.CASE.NR	26	50	23	0.948981
Word.orderClitic.pronouns.finite.verbOV	Word.orderClitic.pronouns.participleVO	30	24	13	0.948732
Verbal.morphologypresent.progressive..APROG.A.Gender.AGR	Word.orderAdpositionsPost	5	57	5	0.947381
Nominal.morphologyGender...Noun.classNEUTR	Word.orderSubordinate.clauseV2	56	9	9	0.944462
Nominal.morphologyNominal.casesAGG.CASE.NR	Verbal.morphologypresent.progressive..DATPROG.DAT.AGR.FULL	50	9	8	0.940195
Nominal.morphologyCase.markingCASE.LAST	Nominal.morphologyPronominal.CasesAGGL.CASE	34	34	20	0.926664
Word.orderClitic.pronouns.finite.verbOV	Word.orderNoun.adjectiveNA	30	45	23	0.918067
Nominal.morphologyNominal.cases.7.Cases	TENSEFutureFUT.Participle	26	18	8	0.91458
Word.orderClitic.pronouns.participleVO	Word.orderMain.clausesVSO	24	12	5	0.909511
ALIGNMENTPronoun..Simple.PastP.PST..O.So.	Verbal.morphologysimple.PAST..APST.NO.A.AGR	37	29	18	0.90937
ALIGNMENTVerb..Present.ProgressiveV.PROG.A.O.	Nominal.morphologyDefiniteness.markingN.DEF	9	33	5	0.906138
Verbal.morphologypresent.progressive..OPROG.O.AGR.FULL	Verbal.morphologysimple.PAST..APST.A.AGR.FULL	7	59	7	0.906069
Verbal.morphologypresent.progressive..DATPROG.DAT.AGR.FULL	Verbal.morphologysimple.PAST..APST.A.AGR.FULL	9	59	9	0.906069
Verbal.morphologysimple.PAST..APST.A.AGR.FULL	Verbal.morphologysimple.PAST..DATPST.DAT.AGR.FULL	59	10	10	0.906069
Nominal.morphologyNominal.casesAGG.CASE.NR	Nominal.morphologyPronominal.CasesAGGL.CASE	50	34	29	0.905739
ALIGNMENTCompare.PROG.PASTPAST_A.PROG_O	ALIGNMENTNoun..Present.ProgressiveN.PROG..O.So.	11	49	9	0.904721
Nominal.morphologyNominal.casesAGG.CASE.NR	Verbal.morphologypresent.progressive..OPROG.O.AGR.FULL	50	7	6	0.903827
Word.orderClitic.pronouns.finite.verbVO	Word.orderClitic.pronouns.participleOV	29	28	14	0.902591
Nominal.morphologyNominal.casesAGG.CASE.NR	Nominal.morphologyNominal.casesAGGL.CASE	50	45	38	0.902507
Nominal.morphologyCase.markingCASE.LAST	Verbal.morphologysimple.PAST..OPST.O.AGR.FULL	34	14	8	0.897677
Word.orderMain.clausesVSO	Word.orderNoun.adjectiveNA	12	45	9	0.896088
Nominal.morphologyNominal.casesVOC	Verbal.morphologypresent.progressive..APROG.A.Gender.AGR	60	5	5	0.896088
Word.orderClitic.pronouns.finite.verbOV	Word.orderMain.clausesVSO	30	12	6	0.889308
Nominal.morphologyCase.markingCASE.LAST	Word.orderNoun.relative.clauseRelN	34	23	14	0.883078
Nominal.morphologyDefiniteness.markingN.DEF	Verbal.morphologypresent.progressive..APROG.NO.A.AGR	33	11	6	0.88101
Nominal.morphologyDefiniteness.markingN.DEF	Word.orderSubordinate.clauseV2	33	9	5	0.878739
Nominal.morphologyDefiniteness.markingDEF.FIRST	Word.orderClitic.pronouns.participleVO	34	24	14	0.877057
Nominal.morphologyNominal.cases.7.Cases	Nominal.morphologyNominal.casesAGGL.CASE	26	45	19	0.876892
ALIGNMENTVerb..Present.ProgressiveV.PROG.A.O.	Word.orderMain.clausesV2	9	34	5	0.876285
Verbal.morphologysimple.PAST..OPST.O.AGR.FULL	Word.orderAdpositionsPost	14	57	13	0.873273
Word.orderAdpositionsPost	Word.orderNoun.relative.clauseRelN	57	23	23	0.869604
Word.orderClitic.pronouns.finite.verbOV	Word.orderSubordinate.clauseVSO	30	16	8	0.868689
Nominal.morphologyGender...Noun.classANIM	Nominal.morphologyNominal.casesAGGL.CASE	11	45	8	0.865316
ALIGNMENTPronoun..Present.ProgressiveP.PROG..O.So.	Verbal.morphologysimple.PAST..OPST.O.Gender.AGR	24	13	5	0.863647
Word.orderClitic.pronouns.finite.verbVO	Word.orderMain.clausesV2	29	34	16	0.862585
Word.orderMain.clausesSVO	Word.orderSubordinate.clauseSVO	50	57	47	0.858107
ALIGNMENTCompare.PROG.PASTPAST_A.PROG_O	Nominal.morphologyCase.markingCASE.LAST	11	34	6	0.857936
Nominal.morphologyCase.markingCASE.LAST	Word.orderAdpositionsPost	34	57	31	0.855008
Nominal.morphologyDefiniteness.markingDEF.FIRST	TENSEFutureFUT.Particle	34	16	9	0.854483
ALIGNMENTNoun..Present.ProgressiveN.PROG..O.So.	ALIGNMENTVerb..Present.ProgressiveV.PROG.A.O.	49	9	7	0.854078
Nominal.morphologyGender...Noun.classANIM	Word.orderAdpositionsPost	11	57	10	0.852071
Nominal.morphologyCase.markingCASE.LAST	Nominal.morphologyPronominal.Cases.7.Cases	34	11	6	0.844331
Nominal.morphologyPronominal.Cases.7.Cases	Nominal.morphologyPronominal.CasesAGGL.CASE	11	34	6	0.844331
ALIGNMENTNoun..Present.ProgressiveN.PROG..O.So.	ALIGNMENTVerb..Present.ProgressiveV.PROG..O.So.	49	13	10	0.843028
Verbal.morphologysimple.PAST..APST.A.Gender.AGR	Word.orderMain.clausesSVO	10	50	8	0.84166
ALIGNMENTPronoun..Simple.PastP.PST..O.So.	Word.orderMain.clausesVSO	37	12	7	0.840518
Verbal.morphologysimple.PAST..DATPST.DAT.AGR.FULL	Word.orderAdpositionsPost	10	57	9	0.835195
ALIGNMENTPronoun..Simple.PastP.PST..O.So.	Nominal.morphologyPreposition.agreementPRON.AGR	37	15	9	0.834084
ALIGNMENTNoun..Present.ProgressiveN.PROG.A.O.	ALIGNMENTVerb..Simple.PastV.PST.A.O.	44	16	11	0.83155
ALIGNMENTPronoun..Present.ProgressiveP.PROG..O.So.	ALIGNMENTVerb..Simple.PastV.PST..O.So.	24	32	12	0.83155
Word.orderInfinitiveVO	Word.orderSubordinate.clauseV2	53	9	8	0.826168
ALIGNMENTVerb..Simple.PastV.PST..O.So.	Verbal.morphologysimple.PAST..OPST.O.AGR.FULL	32	14	7	0.82477
ALIGNMENTCompare.PROG.PASTPAST_A.PROG_O	ALIGNMENTNoun..Simple.PastN.PST..O.So.	11	65	11	0.822825
ALIGNMENTNoun..Simple.PastN.PST..O.So.	Verbal.morphologysimple.PAST..OPST.O.Gender.AGR	65	13	13	0.822825
ALIGNMENTNoun..Simple.PastN.PST..O.So.	ALIGNMENTNoun..Simple.PastN.PST.A.O.	65	40	40	0.822825
ALIGNMENTNoun..Present.ProgressiveN.PROG.A.O.	ALIGNMENTNoun..Simple.PastN.PST..O.So.	44	65	44	0.822825
ALIGNMENTNoun..Present.ProgressiveN.PROG..O.So.	ALIGNMENTNoun..Simple.PastN.PST..O.So.	49	65	49	0.822825
Verbal.morphologypresent.progressive..DATPROG.DAT.AGR.FULL	Word.orderAdpositionsPost	9	57	8	0.822772
TENSEFutureFUT.Participle	Word.orderAdpositionsPost	18	57	16	0.822772
Nominal.morphologyDefiniteness.markingADJ.DEF	Verbal.morphologypresent.progressive..APROG.NO.A.AGR	35	11	6	0.822169
ALIGNMENTNoun..Simple.PastN.PST..O.So.	Verbal.morphologypresent.progressive..APROG.A.Gender.AGR	65	5	5	0.816045
ALIGNMENTNoun..Simple.PastN.PST..O.So.	Verbal.morphologypresent.progressive..APROG.NO.A.AGR	65	11	11	0.816045
ALIGNMENTNoun..Present.ProgressiveN.PROG..O.So.	ALIGNMENTVerb..Simple.PastV.PST.A.O.	49	16	12	0.81093
Nominal.morphologyPronominal.CasesOBL.Cases	Verbal.morphologypresent.progressive..APROG.A.Gender.AGR	65	5	5	0.809266
Nominal.morphologyDefiniteness.markingDEF.FIRST	Word.orderClitic.pronouns.finite.verbOV	34	30	16	0.808064
Verbal.morphologysimple.PAST..APST.A.Gender.AGR	Word.orderSubordinate.clauseSVO	10	57	9	0.807796
ALIGNMENTNoun..Present.ProgressiveN.PROG.A.O.	ALIGNMENTVerb..Present.ProgressiveV.PROG.A.O.	44	9	6	0.807558
Nominal.morphologyNominal.casesAGGL.CASE	Word.orderNoun.relative.clauseRelN	45	23	17	0.803712
Nominal.morphologyPronominal.Cases.7.Cases	Nominal.morphologyPronominal.CasesOBL.Cases	11	65	11	0.80244
Nominal.morphologyPronominal.CasesOBL.Cases	TENSEFuturePERF.FUT	65	14	14	0.80244
Word.orderParticipleVO	Word.orderSubordinate.clauseV2	59	9	9	0.800338
ALIGNMENTCompare.PROG.PASTPROG_A.PST_O	ALIGNMENTNoun..Simple.PastN.PST..O.So.	30	65	29	0.788923
Word.orderNoun.adjectiveNA	Word.orderSubordinate.clauseVSO	45	16	11	0.788457
Verbal.morphologypresent.progressive..OPROG.O.AGR.FULL	Word.orderAdpositionsPost	7	57	6	0.786405
Nominal.morphologyDefiniteness.markingDEF.LAST	Word.orderMain.clausesSOV	9	67	9	0.78574
Word.orderClitic.pronouns.participleVO	Word.orderSubordinate.clauseVSO	24	16	6	0.783531
Nominal.morphologyDefiniteness.markingADJ.DEF	Nominal.morphologyGender...Noun.classNEUTR	35	56	29	0.777029
ALIGNMENTCompare.PROG.PASTPROG_A.PST_O	Word.orderNoun.relative.clauseRelN	30	23	11	0.773859
ALIGNMENTPronoun..Simple.PastP.PST..O.So.	Verbal.morphologypresent.progressive..APROG.NO.A.AGR	37	11	6	0.773379
TENSEFutureFUT.Participle	Word.orderMain.clausesSOV	18	67	18	0.772134
Nominal.morphologyNominal.cases.7.Cases	Nominal.morphologyPronominal.CasesAGGL.CASE	26	34	13	0.770925
ALIGNMENTPronoun..Simple.PastP.PST..O.So.	ALIGNMENTVerb..Present.ProgressiveV.PROG..O.So.	37	13	7	0.767255
Nominal.morphologyDefiniteness.markingDEF.FIRST	Nominal.morphologyDefiniteness.markingDEF.ART	34	61	31	0.766566
Word.orderNoun.PossessorN.Poss	Word.orderNoun.adjectiveNA	58	45	39	0.766269
ALIGNMENTVerb..Simple.PastV.PST.A.O.	Word.orderMain.clausesV2	16	34	8	0.764145
Word.orderClitic.pronouns.participleVO	Word.orderMain.clausesSVO	24	50	18	0.763329
ALIGNMENTNoun..Present.ProgressiveN.PROG..O.So.	ALIGNMENTPronoun..Present.ProgressiveP.PROG..O.So.	49	24	17	0.760551
ALIGNMENTPronoun..Present.ProgressiveP.PROG..O.So.	Nominal.morphologyNominal.cases.7.Cases	24	26	9	0.758286
Nominal.morphologyCase.markingCASE.LAST	Verbal.morphologysimple.PAST..DATPST.DAT.AGR.FULL	34	10	5	0.757319
Word.orderClitic.pronouns.participleOV	Word.orderMain.clausesVSO	28	12	5	0.75536
ALIGNMENTNoun..Present.ProgressiveN.PROG.A.O.	Verbal.morphologypresent.progressive..APROG.NO.A.AGR	44	11	7	0.754258
ALIGNMENTNoun..Simple.PastN.PST..O.So.	ALIGNMENTVerb..Simple.PastV.PST..O.So.	65	32	30	0.751507
Nominal.morphologyCase.markingCASE.LAST	Nominal.morphologyNominal.casesAGGL.CASE	34	45	22	0.748452
Nominal.morphologyPreposition.agreementPRON.AGR	Word.orderNoun.adjectiveNA	15	45	10	0.743699
ALIGNMENTNoun..Simple.PastN.PST..O.So.	ALIGNMENTVerb..Present.ProgressiveV.PROG..O.So.	65	13	12	0.742782
Word.orderClitic.pronouns.infinitiveVO	Word.orderNoun.adjectiveNA	20	45	13	0.739288
ALIGNMENTNoun..Simple.PastN.PST..O.So.	ALIGNMENTPronoun..Simple.PastP.PST..O.So.	65	37	34	0.738268
Nominal.morphologyCase.markingCASE.ADJ	Word.orderSubordinate.clauseV2	68	9	9	0.7367
ALIGNMENTCompare.PROG.PASTPAST_A.PROG_O	ALIGNMENTVerb..Simple.PastV.PST..O.So.	11	32	5	0.736239
ALIGNMENTPronoun..Present.ProgressiveP.PROG.A.O.	ALIGNMENTVerb..Simple.PastV.PST..O.So.	22	32	10	0.736239
Nominal.morphologyNominal.cases.7.Cases	Nominal.morphologyPronominal.CasesOBL.Cases	26	65	24	0.736003
ALIGNMENTVerb..Simple.PastV.PST.A.O.	Nominal.morphologyDefiniteness.markingADJ.DEF	16	35	8	0.735158
ALIGNMENTCompare.PROG.PASTPROG_A.PST_O	TENSEFuturePERF.FUT	30	14	6	0.735111
Nominal.morphologyGender...Noun.classNEUTR	Verbal.morphologysimple.PAST..APST.A.Gender.AGR	56	10	8	0.735111
Verbal.morphologysimple.PAST..APST.A.Gender.AGR	Word.orderInfinitiveVO	10	53	8	0.734601
Word.orderInfinitiveVO	Word.orderParticipleVO	53	59	51	0.733701
ALIGNMENTVerb..Simple.PastV.PST..O.So.	Nominal.morphologyGender...Noun.classANIM	32	11	5	0.72946
Nominal.morphologyPronominal.CasesAGGL.CASE	Word.orderNoun.relative.clauseRelN	34	23	12	0.728927
Nominal.morphologyNominal.casesAGG.CASE.NR	Verbal.morphologysimple.PAST..OPST.O.AGR.FULL	50	14	10	0.728332
Nominal.morphologyCase.markingCASE.ART	Word.orderMain.clausesV2	45	34	22	0.727973
Nominal.morphologyNominal.casesAGGL.CASE	Nominal.morphologyPronominal.Cases.7.Cases	45	11	7	0.724959
ALIGNMENTNoun..Present.ProgressiveN.PROG..O.So.	ALIGNMENTPronoun..Present.ProgressiveP.PROG.A.O.	49	22	15	0.7224
Word.orderMain.clausesVSO	Word.orderNoun.PossessorN.Poss	12	58	10	0.720269
Nominal.morphologyCase.markingCASE.LAST	Nominal.morphologyNominal.casesAGG.CASE.NR	34	50	24	0.716497
Word.orderInfinitiveVO	Word.orderSubordinate.clauseSVO	53	57	45	0.707563
Verbal.morphologysimple.PAST..OPST.O.Gender.AGR	Word.orderMain.clausesSOV	13	67	12	0.705697
ALIGNMENTNoun..Simple.PastN.PST..O.So.	ALIGNMENTVerb..Present.ProgressiveV.PROG.A.O.	65	9	8	0.705042
Nominal.morphologyNominal.casesAGGL.CASE	Verbal.morphologysimple.PAST..OPST.O.Gender.AGR	45	13	8	0.705042
Nominal.morphologyDefiniteness.markingDEF.LAST	Word.orderAdpositionsPost	9	57	7	0.702847
Nominal.morphologyNominal.cases.7.Cases	Verbal.morphologysimple.PAST..OPST.O.AGR.FULL	26	14	5	0.702717
Nominal.morphologyDefiniteness.markingDEF.FIRST	Word.orderMain.clausesSVO	34	50	24	0.702704
ALIGNMENTCompare.PROG.PASTPROG_A.PST_O	Nominal.morphologyCase.markingCASE.LAST	30	34	14	0.701932
Word.orderClitic.pronouns.infinitiveVO	Word.orderMain.clausesSVO	20	50	14	0.701256
Word.orderMain.clausesSOV	Word.orderNoun.relative.clauseRelN	67	23	23	0.701183
Nominal.morphologyDefiniteness.markingDEF.ART	Word.orderMain.clausesVSO	61	12	10	0.697237
Nominal.morphologyPronominal.CasesOBL.Cases	Verbal.morphologysimple.PAST..APST.A.Gender.AGR	65	10	9	0.697079
Nominal.morphologyPronominal.CasesOBL.Cases	Verbal.morphologysimple.PAST..DATPST.DAT.AGR.FULL	65	10	9	0.697079
Nominal.morphologyGender...Noun.classNEUTR	Word.orderMain.clausesV2	56	34	26	0.696817
Word.orderAdpositionsPost	Word.orderMain.clausesSOV	57	67	52	0.693932
Word.orderClitic.pronouns.participleVO	Word.orderNoun.adjectiveNA	24	45	15	0.693147
Nominal.morphologyNominal.casesAGG.CASE.NR	Word.orderAdpositionsPost	50	57	39	0.692094
ALIGNMENTVerb..Present.ProgressiveV.PROG..O.So.	Nominal.morphologyCase.markingCASE.LAST	13	34	6	0.690882
Nominal.morphologyCase.markingCASE.LAST	Verbal.morphologysimple.PAST..OPST.O.Gender.AGR	34	13	6	0.690882
Nominal.morphologyPronominal.CasesAGGL.CASE	Verbal.morphologysimple.PAST..OPST.O.Gender.AGR	34	13	6	0.690882
Nominal.morphologyDefiniteness.markingN.DEF	Nominal.morphologyPreposition.agreementPRON.AGR	33	15	7	0.6904
ALIGNMENTNoun..Simple.PastN.PST.A.O.	ALIGNMENTVerb..Present.ProgressiveV.PROG..O.So.	40	13	7	0.689294
ALIGNMENTNoun..Simple.PastN.PST..O.So.	ALIGNMENTPronoun..Present.ProgressiveP.PROG..O.So.	65	24	21	0.689294
ALIGNMENTCompare.PROG.PASTPROG_A.PST_O	Word.orderAdpositionsPost	30	57	23	0.688458
Nominal.morphologyCase.markingCASE.LAST	Word.orderMain.clausesSOV	34	67	31	0.686587
Nominal.morphologyPronominal.CasesOBL.Cases	Verbal.morphologypresent.progressive..DATPROG.DAT.AGR.FULL	65	9	8	0.684657
Verbal.morphologysimple.PAST..APST.A.AGR.FULL	Word.orderSubordinate.clauseVSO	59	16	13	0.684636
ALIGNMENTPronoun..Present.ProgressiveP.PROG..O.So.	Nominal.morphologyCase.markingCASE.LAST	24	34	11	0.683914
Nominal.morphologyGender...Noun.classANIM	Word.orderMain.clausesSOV	11	67	10	0.68365
Nominal.morphologyDefiniteness.markingDEF.FIRST	Nominal.morphologyPronominal.CasesAGGL.CASE.NR	34	15	7	0.681313
Nominal.morphologyDefiniteness.markingDEF.FIRST	Word.orderClitic.pronouns.infinitiveOV	34	21	10	0.681037
Nominal.morphologyNominal.casesOBL.Cases	Nominal.morphologyPronominal.CasesAGGL.CASE.NR	75	15	15	0.679724
Nominal.morphologyNominal.cases.7.Cases	Nominal.morphologyNominal.casesOBL.Cases	26	75	26	0.679724
Nominal.morphologyPronominal.CasesDAT.O	Verbal.morphologysimple.PAST..APST.A.Gender.AGR	74	10	10	0.679542
Nominal.morphologyPronominal.Cases.7.Cases	Nominal.morphologyPronominal.CasesDAT.O	11	74	11	0.679542
Word.orderClitic.pronouns.finite.verbOV	Word.orderNoun.PossessorN.Poss	30	58	24	0.679447
Nominal.morphologyGender...Noun.classNEUTR	Word.orderClitic.pronouns.finite.verb2nd.position	56	12	9	0.677399
ALIGNMENTNoun..Simple.PastN.PST..O.So.	ALIGNMENTPronoun..Present.ProgressiveP.PROG.A.O.	65	22	19	0.676222
ALIGNMENTPronoun..Present.ProgressiveP.PROG.A.O.	Nominal.morphologyCase.markingCASE.LAST	22	34	10	0.675615
ALIGNMENTNoun..Simple.PastN.PST..O.So.	Verbal.morphologysimple.PAST..APST.NO.A.AGR	65	29	25	0.674405
Nominal.morphologyNominal.casesOBL.Cases	Verbal.morphologypresent.progressive..APROG.A.Gender.AGR	75	5	5	0.672944
Nominal.morphologyGender...Noun.classANIM	Nominal.morphologyNominal.casesOBL.Cases	11	75	11	0.672944
Nominal.morphologyPronominal.CasesAGGL.CASE.NR	Nominal.morphologyPronominal.CasesOBL.Cases	15	65	13	0.672944
ALIGNMENTNoun..Simple.PastN.PST.A.O.	Word.orderClitic.pronouns.finite.verbOV	40	30	16	0.672944
Nominal.morphologyNominal.casesOBL.Cases	Nominal.morphologyPronominal.CasesOBL.Cases	75	65	65	0.672944
Nominal.morphologyGender...Noun.classNEUTR	Word.orderClitic.pronouns.infinitive2nd.position	56	12	9	0.670573
Nominal.morphologyCase.markingCASE.LAST	Nominal.morphologyGender...Noun.classANIM	34	11	5	0.668835
Nominal.morphologyCase.markingCASE.LAST	Verbal.morphologypresent.progressive..APROG.NO.A.AGR	34	11	5	0.668835
Verbal.morphologypresent.progressive..APROG.NO.A.AGR	Word.orderMain.clausesV2	11	34	5	0.668835
Word.orderClitic.pronouns.finite.verbOV	Word.orderMain.clausesSVO	30	50	20	0.666165
Nominal.morphologyNominal.casesOBL.Cases	Verbal.morphologypresent.progressive..OPROG.O.AGR.FULL	75	7	7	0.666119
Nominal.morphologyNominal.casesOBL.Cases	Verbal.morphologypresent.progressive..DATPROG.DAT.AGR.FULL	75	9	9	0.666119
Nominal.morphologyNominal.casesOBL.Cases	Verbal.morphologysimple.PAST..DATPST.DAT.AGR.FULL	75	10	10	0.666119
Nominal.morphologyNominal.casesOBL.Cases	Nominal.morphologyPronominal.Cases.7.Cases	75	11	11	0.666119
Nominal.morphologyNominal.casesOBL.Cases	TENSEFuturePERF.FUT	75	14	14	0.666119
ALIGNMENTPronoun..Present.ProgressiveP.PROG..O.So.	Nominal.morphologyNominal.casesAGG.CASE.NR	24	50	16	0.666119
ALIGNMENTPronoun..Simple.PastP.PST..O.So.	Word.orderSubordinate.clauseVSO	37	16	8	0.665748
Word.orderClitic.pronouns.participleVO	Word.orderSubordinate.clauseSVO	24	57	19	0.665748
TENSEFutureFUT.Participle	Word.orderNoun.relative.clauseRelN	18	23	6	0.664943
Word.orderClitic.pronouns.participleOV	Word.orderNoun.adjectiveNA	28	45	17	0.66416
Word.orderClitic.pronouns.infinitiveVO	Word.orderInfinitiveVO	20	53	15	0.66319
ALIGNMENTVerb..Present.ProgressiveV.PROG..O.So.	Nominal.morphologyDefiniteness.markingADJ.DEF	13	35	6	0.661895
ALIGNMENTNoun..Simple.PastN.PST..O.So.	Verbal.morphologysimple.PAST..OPST.O.AGR.FULL	65	14	12	0.661895
ALIGNMENTVerb..Simple.PastV.PST.A.O.	Nominal.morphologyDefiniteness.markingN.DEF	16	33	7	0.660467
ALIGNMENTReflexive.Pronoun.in.trans..ClauseREFL.ref.O	Word.orderAdpositionsPost	5	57	5	0.657429
Nominal.morphologyGender...Noun.classNEUTR	Word.orderClitic.pronouns.participle2nd.position	56	12	9	0.65678
Nominal.morphologyDefiniteness.markingDEF.ART	Word.orderSubordinate.clauseVSO	61	16	13	0.6513
ALIGNMENTPronoun..Simple.PastP.PST..O.So.	Word.orderNoun.relative.clauseRelN	37	23	12	0.651149
ALIGNMENTNoun..Simple.PastN.PST..O.So.	ALIGNMENTPronoun..Simple.PastP.PST.A.O.	65	19	16	0.650975
Nominal.morphologyPronominal.CasesOBL.Cases	Verbal.morphologypresent.progressive..OPROG.O.AGR.FULL	65	7	6	0.648289
Nominal.morphologyNominal.casesAGG.CASE.NR	Nominal.morphologyNominal.casesOBL.Cases	50	75	49	0.645916
Nominal.morphologyCase.markingCASE.ADJ	Verbal.morphologysimple.PAST..APST.A.Gender.AGR	68	10	9	0.645133
Nominal.morphologyNominal.casesVOC	Verbal.morphologysimple.PAST..OPST.O.Gender.AGR	60	13	10	0.640503
Nominal.morphologyPronominal.CasesAGGL.CASE	Word.orderAdpositionsPost	34	57	25	0.639897
Nominal.morphologyNominal.casesGEN.DAT	TENSEFuturePERF.FUT	77	14	14	0.639801
ALIGNMENTPronoun..Simple.PastP.PST..O.So.	Word.orderAdpositionsPost	37	57	27	0.63908
ALIGNMENTNoun..Simple.PastN.PST.A.O.	Nominal.morphologyPreposition.agreementPRON.AGR	40	15	8	0.638339
ALIGNMENTNoun..Present.ProgressiveN.PROG.A.O.	Word.orderClitic.pronouns.finite.verbOV	44	30	17	0.638259
ALIGNMENTCompare.PROG.PASTPROG_A.PST_O	TENSEFutureFUT.Participle	30	18	7	0.637948
ALIGNMENTNoun..Simple.PastN.PST.A.O.	Word.orderNoun.adjectiveNA	40	45	23	0.637165
Word.orderInfinitiveVO	Word.orderMain.clausesSVO	53	50	36	0.636067
ALIGNMENTPronoun..Present.ProgressiveP.PROG.A.O.	Word.orderNoun.relative.clauseRelN	22	23	7	0.632028
Nominal.morphologyDefiniteness.markingDEF.FIRST	Word.orderSubordinate.clauseSVO	34	57	26	0.631099
Word.orderNoun.PossessorN.Poss	Word.orderSubordinate.clauseV2	58	9	7	0.630657
Word.orderClitic.pronouns.participleOV	Word.orderSubordinate.clauseVSO	28	16	6	0.629381
TENSEFutureFUT.Particle	Word.orderClitic.pronouns.finite.verbVO	16	29	6	0.628702
ALIGNMENTNoun..Present.ProgressiveN.PROG..O.So.	ALIGNMENTVerb..Simple.PastV.PST..O.So.	49	32	20	0.628609
Nominal.morphologyNominal.casesAGG.CASE.NR	Nominal.morphologyPronominal.CasesOBL.Cases	50	65	42	0.628086
Nominal.morphologyNominal.casesGEN.DAT	Word.orderSubordinate.clauseV2	77	9	9	0.626008
Nominal.morphologyCase.markingCASE.ADJ	Nominal.morphologyCase.markingCASE.ART	68	45	40	0.625837
ALIGNMENTPronoun..Simple.PastP.PST..O.So.	Nominal.morphologyCase.markingCASE.LAST	37	34	16	0.625743
ALIGNMENTNoun..Present.ProgressiveN.PROG.A.O.	Nominal.morphologyDefiniteness.markingDEF.LAST	44	9	5	0.625236
ALIGNMENTNoun..Present.ProgressiveN.PROG.A.O.	Word.orderNoun.adjectiveNA	44	45	25	0.625236
Verbal.morphologysimple.PAST..APST.A.AGR.FULL	Word.orderMain.clausesVSO	59	12	9	0.625213
Verbal.morphologysimple.PAST..OPST.O.AGR.FULL	Word.orderMain.clausesSOV	14	67	12	0.62481
Nominal.morphologyCase.markingCASE.ART	Word.orderMain.clausesVSO	45	12	7	0.624295
Nominal.morphologyNominal.casesAGG.CASE.NR	Word.orderNoun.relative.clauseRelN	50	23	16	0.624121
TENSEFuturePERF.FUT	Word.orderMain.clausesSVO	14	50	9	0.622971
Nominal.morphologyPronominal.Cases.7.Cases	Word.orderAdpositionsPost	11	57	8	0.622102
ALIGNMENTPronoun..Present.ProgressiveP.PROG.A.O.	Nominal.morphologyNominal.casesAGG.CASE.NR	22	50	14	0.619598
Word.orderClitic.pronouns.infinitiveVO	Word.orderSubordinate.clauseSVO	20	57	15	0.618601
Nominal.morphologyPronominal.CasesAGGL.CASE	Nominal.morphologyPronominal.CasesOBL.Cases	34	65	28	0.61511
TENSEFutureFUT.Particle	Word.orderClitic.pronouns.participleVO	16	24	5	0.615003
Nominal.morphologyNominal.casesAGGL.CASE	Word.orderAdpositionsPost	45	57	32	0.613234
Nominal.morphologyNominal.casesOBL.Cases	Nominal.morphologyPronominal.CasesAGGL.CASE	75	34	32	0.61232
TENSEFutureFUT.Synth	Verbal.morphologysimple.PAST..OPST.O.Gender.AGR	68	13	11	0.61065
ALIGNMENTPronoun..Present.ProgressiveP.PROG..O.So.	Word.orderAdpositionsPost	24	57	17	0.609321
Nominal.morphologyGender...Noun.classANIM	Nominal.morphologyPronominal.CasesOBL.Cases	11	65	9	0.608595
Nominal.morphologyNominal.casesVOC	Word.orderClitic.pronouns.finite.verb2nd.position	60	12	9	0.608406
Nominal.morphologyNominal.casesVOC	Word.orderMain.clausesVSO	60	12	9	0.608406
ALIGNMENTNoun..Simple.PastN.PST..O.So.	ALIGNMENTVerb..Simple.PastV.PST.A.O.	65	16	13	0.608406
Word.orderParticipleVO	Word.orderSubordinate.clauseSVO	59	57	47	0.607435
ALIGNMENTNoun..Present.ProgressiveN.PROG.A.O.	ALIGNMENTPronoun..Present.ProgressiveP.PROG.A.O.	44	22	12	0.606887
Nominal.morphologyDefiniteness.markingDEF.LAST	Nominal.morphologyNominal.casesAGGL.CASE	9	45	5	0.602763
Nominal.morphologyNominal.casesVOC	Word.orderClitic.pronouns.infinitive2nd.position	60	12	9	0.60158
Nominal.morphologyNominal.casesVOC	TENSEFutureFUT.Particle	60	16	12	0.60158
Nominal.morphologyNominal.casesOBL.Cases	Verbal.morphologysimple.PAST..OPST.O.AGR.FULL	75	14	13	0.598837
Verbal.morphologysimple.PAST..OPST.O.Gender.AGR	Word.orderInfinitiveOV	13	77	13	0.597837
Word.orderClitic.pronouns.infinitiveOV	Word.orderMain.clausesV2	21	34	9	0.596296
TENSEFutureFUT.Particle	Word.orderClitic.pronouns.finite.verbOV	16	30	6	0.5948
Word.orderNoun.PossessorN.Poss	Word.orderSubordinate.clauseVSO	58	16	12	0.594289
ALIGNMENTPronoun..Present.ProgressiveP.PROG.A.O.	Nominal.morphologyNominal.cases.7.Cases	22	26	7	0.593983
ALIGNMENTPronoun..Simple.PastP.PST..O.So.	Nominal.morphologyGender...Noun.classANIM	37	11	5	0.591057
Verbal.morphologypresent.progressive..APROG.A.Gender.AGR	Word.orderInfinitiveOV	5	77	5	0.591057
Nominal.morphologyGender...Noun.classANIM	Word.orderInfinitiveOV	11	77	11	0.591057
Verbal.morphologysimple.PAST..APST.A.Gender.AGR	Word.orderParticipleVO	10	59	8	0.590988
Nominal.morphologyNominal.casesAGGL.CASE	TENSEFutureFUT.Participle	45	18	10	0.589157
Nominal.morphologyDefiniteness.markingDEF.LAST	Word.orderParticipleOV	9	75	9	0.587787
Nominal.morphologyNominal.casesVOC	Word.orderClitic.pronouns.participle2nd.position	60	12	9	0.587787
ALIGNMENTNoun..Simple.PastN.PST.A.O.	Word.orderClitic.pronouns.participleVO	40	24	12	0.587787
ALIGNMENTNoun..Simple.PastN.PST.A.O.	Nominal.morphologyDefiniteness.markingDEF.FIRST	40	34	17	0.587787
ALIGNMENTNoun..Simple.PastN.PST..O.So.	Verbal.morphologysimple.PAST..DATPST.DAT.AGR.FULL	65	10	8	0.586076
Nominal.morphologyNominal.casesOBL.Cases	Word.orderClitic.pronouns.finite.verb2nd.position	75	12	11	0.585933
ALIGNMENTPronoun..Simple.PastP.PST..O.So.	Nominal.morphologyPronominal.Cases.7.Cases	37	11	5	0.584231
Nominal.morphologyDefiniteness.markingDEF.FIRST	Word.orderNoun.adjectiveNA	34	45	19	0.581229
Nominal.morphologyCase.markingCASE.ART	TENSEFutureFUT.Particle	45	16	9	0.581101
Verbal.morphologypresent.progressive..APROG.A.Gender.AGR	Word.orderParticipleOV	5	75	5	0.581007
TENSEFutureFUT.Participle	Verbal.morphologysimple.PAST..APST.A.AGR.FULL	18	59	13	0.580647
Nominal.morphologyNominal.casesOBL.Cases	Word.orderClitic.pronouns.infinitive2nd.position	75	12	11	0.579107
Nominal.morphologyDefiniteness.markingDEF.ART	Word.orderClitic.pronouns.infinitiveVO	61	20	15	0.578178
TENSEFuturePERF.FUT	Word.orderSubordinate.clauseSVO	14	57	10	0.576684
Verbal.morphologysimple.PAST..APST.A.AGR.FULL	Verbal.morphologysimple.PAST..OPST.O.AGR.FULL	59	14	10	0.576423
Nominal.morphologyDefiniteness.markingDEF.LAST	Word.orderSubordinate.clauseSOV	9	81	9	0.575364
Nominal.morphologyCase.markingCASE.ADJ	Word.orderClitic.pronouns.finite.verb2nd.position	68	12	10	0.574998
Word.orderMain.clausesSVO	Word.orderParticipleVO	50	59	39	0.572496
ALIGNMENTPronoun..Present.ProgressiveP.PROG.A.O.	Word.orderAdpositionsPost	22	57	15	0.571169
Verbal.morphologypresent.progressive..APROG.A.Gender.AGR	Word.orderSubordinate.clauseSOV	5	81	5	0.568584
Nominal.morphologyCase.markingCASE.ADJ	Word.orderClitic.pronouns.infinitive2nd.position	68	12	10	0.568172
Nominal.morphologyPronominal.CasesOBL.Cases	Verbal.morphologysimple.PAST..OPST.O.AGR.FULL	65	14	11	0.568104
ALIGNMENTVerb..Simple.PastV.PST..O.So.	TENSEFutureFUT.Participle	32	18	7	0.566629
Nominal.morphologyNominal.casesOBL.Cases	Word.orderClitic.pronouns.participle2nd.position	75	12	11	0.565314
ALIGNMENTCompare.PROG.PASTPROG_A.PST_O	Word.orderMain.clausesSOV	30	67	24	0.562596
ALIGNMENTPronoun..Simple.PastP.PST..O.So.	TENSEFutureFUT.Participle	37	18	8	0.561758
ALIGNMENTNoun..Simple.PastN.PST.A.O.	ALIGNMENTPronoun..Simple.PastP.PST.A.O.	40	19	9	0.561118
Nominal.morphologyNominal.casesOBL.Cases	Verbal.morphologysimple.PAST..APST.A.Gender.AGR	75	10	9	0.560758
ALIGNMENTNoun..Present.ProgressiveN.PROG..O.So.	ALIGNMENTPronoun..Simple.PastP.PST.A.O.	49	19	11	0.558848
ALIGNMENTNoun..Simple.PastN.PST..O.So.	Verbal.morphologypresent.progressive..DATPROG.DAT.AGR.FULL	65	9	7	0.557905
ALIGNMENTNoun..Present.ProgressiveN.PROG..O.So.	Word.orderNoun.adjectiveNA	49	45	26	0.556826
Nominal.morphologyCase.markingCASE.ADJ	Word.orderClitic.pronouns.participle2nd.position	68	12	10	0.554378
Nominal.morphologyPronominal.CasesOBL.Cases	Verbal.morphologysimple.PAST..OPST.O.Gender.AGR	65	13	10	0.553681
Nominal.morphologyCase.markingCASE.ART	Nominal.morphologyDefiniteness.markingADJ.DEF	45	35	19	0.552382
Verbal.morphologysimple.PAST..DATPST.DAT.AGR.FULL	Word.orderMain.clausesSOV	10	67	8	0.548991
Nominal.morphologyNominal.casesOBL.Cases	Word.orderAdpositionsPost	75	57	50	0.548696
Nominal.morphologyCase.markingCASE.LAST	Nominal.morphologyPronominal.CasesAGGL.CASE.NR	34	15	6	0.547781
ALIGNMENTNoun..Present.ProgressiveN.PROG.A.O.	Word.orderClitic.pronouns.infinitiveOV	44	21	11	0.545917
ALIGNMENTPronoun..Present.ProgressiveP.PROG..O.So.	Word.orderNoun.relative.clauseRelN	24	23	7	0.545017
Nominal.morphologyCase.markingCASE.ART	Nominal.morphologyPronominal.CasesAGGL.CASE.NR	45	15	8	0.541463
Nominal.morphologyNominal.casesDAT	TENSEFuturePERF.FUT	85	14	14	0.540955
ALIGNMENTNoun..Simple.PastN.PST.A.O.	Word.orderInfinitiveVO	40	53	26	0.540568
TENSEFutureFUT.AUX	Verbal.morphologysimple.PAST..APST.A.Gender.AGR	63	10	8	0.540097
ALIGNMENTVerb..Present.ProgressiveV.PROG..O.So.	Nominal.morphologyDefiniteness.markingN.DEF	13	33	5	0.538414
Word.orderMain.clausesSOV	Word.orderSubordinate.clauseSOV	67	81	65	0.538279
Verbal.morphologysimple.PAST..DATPST.DAT.AGR.FULL	Word.orderWH.elementWH.V	10	68	9	0.536723
Nominal.morphologyNominal.casesAGGL.CASE	Nominal.morphologyNominal.casesOBL.Cases	45	75	39	0.536623
Nominal.morphologyDefiniteness.markingDEF.ART	Nominal.morphologyPreposition.agreementPRON.AGR	61	15	11	0.534798
Nominal.morphologyNominal.casesGEN.DAT	Verbal.morphologysimple.PAST..APST.A.Gender.AGR	77	10	9	0.534441
Nominal.morphologyNominal.casesVOC	Verbal.morphologysimple.PAST..APST.A.Gender.AGR	60	10	7	0.532587
Nominal.morphologyDefiniteness.markingDEF.FIRST	Word.orderParticipleVO	34	59	26	0.532074
ALIGNMENTNoun..Present.ProgressiveN.PROG..O.So.	Word.orderClitic.pronouns.finite.verbOV	49	30	17	0.530628
Nominal.morphologyNominal.cases.7.Cases	Word.orderAdpositionsPost	26	57	17	0.529278
TENSEFutureFUT.Participle	Word.orderInfinitiveOV	18	77	17	0.527073
ALIGNMENTPronoun..Simple.PastP.PST.A.O.	ALIGNMENTVerb..Simple.PastV.PST..O.So.	19	32	7	0.526168
Nominal.morphologyCase.markingCASE.LAST	Nominal.morphologyDefiniteness.markingN.DEF	34	33	13	0.525734
ALIGNMENTPronoun..Simple.PastP.PST..O.So.	TENSEFuturePERF.FUT	37	14	6	0.525391
ALIGNMENTPronoun..Simple.PastP.PST.A.O.	Nominal.morphologyNominal.casesAGG.CASE.NR	19	50	11	0.52504
Nominal.morphologyCase.markingCASE.ART	Nominal.morphologyDefiniteness.markingDEF.ART	45	61	32	0.524933
ALIGNMENTPronoun..Present.ProgressiveP.PROG..O.So.	TENSEFutureFUT.Participle	24	18	5	0.524619
Verbal.morphologypresent.progressive..DATPROG.DAT.AGR.FULL	Word.orderWH.elementWH.V	9	68	8	0.524301
Word.orderClitic.pronouns.infinitiveOV	Word.orderNoun.adjectiveNA	21	45	11	0.523444
Nominal.morphologyCase.markingCASE.ADJ	Nominal.morphologyGender...Noun.classNEUTR	68	56	44	0.522937
Nominal.morphologyDefiniteness.markingDEF.ART	Word.orderClitic.pronouns.finite.verbOV	61	30	21	0.522884
Nominal.morphologyPronominal.CasesOBL.Cases	Word.orderClitic.pronouns.finite.verb2nd.position	65	12	9	0.521584
Verbal.morphologypresent.progressive..DATPROG.DAT.AGR.FULL	Word.orderMain.clausesSOV	9	67	7	0.52082
ALIGNMENTNoun..Present.ProgressiveN.PROG.A.O.	ALIGNMENTPronoun..Present.ProgressiveP.PROG..O.So.	44	24	12	0.519875
Word.orderClitic.pronouns.infinitiveVO	Word.orderParticipleVO	20	59	15	0.519577
ALIGNMENTNoun..Present.ProgressiveN.PROG..O.So.	Nominal.morphologyDefiniteness.markingDEF.LAST	49	9	5	0.517605
TENSEFutureFUT.Participle	Word.orderParticipleOV	18	75	17	0.517023
ALIGNMENTNoun..Simple.PastN.PST.A.O.	Word.orderNoun.PossessorN.Poss	40	58	27	0.516328
Nominal.morphologyNominal.casesDAT	Nominal.morphologyNominal.casesGEN.DAT	85	77	74	0.514821
Nominal.morphologyPronominal.CasesOBL.Cases	Word.orderClitic.pronouns.infinitive2nd.position	65	12	9	0.514758
Word.orderClitic.pronouns.finite.verbOV	Word.orderSubordinate.clauseSVO	30	57	20	0.514517
Nominal.morphologyDefiniteness.markingDEF.LAST	Verbal.morphologysimple.PAST..APST.A.AGR.FULL	9	59	6	0.51421
Nominal.morphologyCase.markingCASE.LAST	Nominal.morphologyNominal.casesOBL.Cases	34	75	29	0.51388
Nominal.morphologyDefiniteness.markingDEF.ART	Word.orderNoun.adjectiveNA	61	45	31	0.513663
Nominal.morphologyGender...Noun.classNEUTR	Verbal.morphologypresent.progressive..APROG.NO.A.AGR	56	11	7	0.513096
ALIGNMENTNoun..Present.ProgressiveN.PROG.A.O.	ALIGNMENTVerb..Simple.PastV.PST..O.So.	44	32	16	0.513096
Word.orderClitic.pronouns.participleVO	Word.orderParticipleVO	24	59	18	0.512656
Nominal.morphologyPronominal.CasesAGGL.CASE	Word.orderMain.clausesSOV	34	67	26	0.510696
Nominal.morphologyDefiniteness.markingADJ.DEF	TENSEFutureFUT.AUX	35	63	27	0.510555
Nominal.morphologyNominal.casesGEN.DAT	Nominal.morphologyPronominal.CasesAGGL.CASE.NR	77	15	13	0.510306
ALIGNMENTVerb..Present.ProgressiveV.PROG..O.So.	Word.orderMain.clausesV2	13	34	5	0.508561
Nominal.morphologyCase.markingCASE.LAST	TENSEFutureFUT.Participle	34	18	7	0.506005
Nominal.morphologyNominal.casesAGGL.CASE	Nominal.morphologyPronominal.CasesOBL.Cases	45	65	33	0.50589
Nominal.morphologyNominal.casesAGGL.CASE	Word.orderMain.clausesSOV	45	67	34	0.505438
Word.orderClitic.pronouns.participleOV	Word.orderMain.clausesV2	28	34	11	0.502364
Nominal.morphologyPronominal.CasesOBL.Cases	Word.orderClitic.pronouns.participle2nd.position	65	12	9	0.500964
Nominal.morphologyNominal.casesVOC	Word.orderSubordinate.clauseVSO	60	16	11	0.500775
Nominal.morphologyCase.markingCASE.ADJ	Nominal.morphologyDefiniteness.markingADJ.DEF	68	35	27	0.497808
Nominal.morphologyNominal.casesAGG.CASE.NR	Word.orderMain.clausesSOV	50	67	38	0.497697
TENSEFuturePERF.FUT	Verbal.morphologypresent.progressive..APROG.A.AGR.FULL	14	82	13	0.496
ALIGNMENTNoun..Simple.PastN.PST.A.O.	Word.orderSubordinate.clauseSVO	40	57	26	0.495979
Verbal.morphologysimple.PAST..OPST.O.Gender.AGR	Word.orderSubordinate.clauseSOV	13	81	12	0.495321
Nominal.morphologyNominal.cases.7.Cases	Verbal.morphologysimple.PAST..APST.A.AGR.FULL	26	59	17	0.494792
ALIGNMENTNoun..Simple.PastN.PST.A.O.	Nominal.morphologyDefiniteness.markingDEF.ART	40	61	27	0.493296
ALIGNMENTNoun..Present.ProgressiveN.PROG.A.O.	Word.orderClitic.pronouns.participleOV	44	28	14	0.492476
ALIGNMENTNoun..Present.ProgressiveN.PROG.A.O.	Nominal.morphologyDefiniteness.markingDEF.FIRST	44	34	17	0.492476
Word.orderNoun.relative.clauseRelN	Word.orderSubordinate.clauseSOV	23	81	23	0.490807
Verbal.morphologypresent.progressive..APROG.A.AGR.FULL	Word.orderClitic.pronouns.finite.verb2nd.position	82	12	11	0.489922
TENSEFutureFUT.Particle	Word.orderMain.clausesSVO	16	50	9	0.48944
ALIGNMENTNoun..Simple.PastN.PST.A.O.	Word.orderClitic.pronouns.infinitiveVO	40	20	9	0.489347
ALIGNMENTReflexive.Pronoun.in.trans..ClauseREFL.ref.O	Word.orderMain.clausesSOV	5	67	5	0.489008
Verbal.morphologypresent.progressive..OPROG.O.AGR.FULL	Word.orderWH.elementWH.V	7	68	6	0.487933
Nominal.morphologyPronominal.CasesOBL.Cases	Word.orderAdpositionsPost	65	57	41	0.486566
Nominal.morphologyPronominal.CasesOBL.Cases	Word.orderNoun.relative.clauseRelN	65	23	18	0.486365
Nominal.morphologyDefiniteness.markingDEF.LAST	Nominal.morphologyNominal.casesAGG.CASE.NR	9	50	5	0.483797
Nominal.morphologyNominal.casesAGGL.CASE	Verbal.morphologysimple.PAST..DATPST.DAT.AGR.FULL	45	10	5	0.483797
Word.orderAdpositionsPost	Word.orderSubordinate.clauseSOV	57	81	52	0.483557
Verbal.morphologypresent.progressive..APROG.A.AGR.FULL	Word.orderClitic.pronouns.infinitive2nd.position	82	12	11	0.483096
Nominal.morphologyDefiniteness.markingDEF.FIRST	Word.orderClitic.pronouns.participleOV	34	28	11	0.481745
ALIGNMENTNoun..Simple.PastN.PST.A.O.	Word.orderMain.clausesSVO	40	50	22	0.480573
Nominal.morphologyDefiniteness.markingDEF.LAST	Word.orderInfinitiveOV	9	77	8	0.480054
Nominal.morphologyNominal.cases.7.Cases	Nominal.morphologyPronominal.CasesDAT.O	26	74	21	0.479573
Nominal.morphologyCase.markingCASE.ART	Nominal.morphologyGender...Noun.classNEUTR	45	56	28	0.476924
Word.orderClitic.pronouns.participleVO	Word.orderNoun.PossessorN.Poss	24	58	16	0.476506
ALIGNMENTVerb..Simple.PastV.PST..O.So.	Nominal.morphologyCase.markingCASE.LAST	32	34	12	0.476463
Nominal.morphologyCase.markingCASE.LAST	Word.orderSubordinate.clauseSOV	34	81	31	0.476211
Word.orderClitic.pronouns.participleVO	Word.orderInfinitiveVO	24	53	15	0.473948
Nominal.morphologyGender...Noun.classANIM	Word.orderSubordinate.clauseSOV	11	81	10	0.473274
Nominal.morphologyPreposition.agreementPRON.AGR	Verbal.morphologysimple.PAST..APST.A.AGR.FULL	15	59	10	0.472825
ALIGNMENTNoun..Simple.PastN.PST..O.So.	Verbal.morphologypresent.progressive..OPROG.O.AGR.FULL	65	7	5	0.472747
ALIGNMENTNoun..Simple.PastN.PST.A.O.	Word.orderParticipleVO	40	59	28	0.471062
ALIGNMENTPronoun..Simple.PastP.PST..O.So.	Word.orderMain.clausesSOV	37	67	27	0.470659
Nominal.morphologyNominal.casesAGG.CASE.NR	TENSEFutureFUT.Participle	50	18	10	0.470191
Verbal.morphologypresent.progressive..APROG.A.AGR.FULL	Word.orderClitic.pronouns.participle2nd.position	82	12	11	0.469303
ALIGNMENTPronoun..Present.ProgressiveP.PROG.A.O.	Verbal.morphologysimple.PAST..APST.A.AGR.FULL	22	59	14	0.46769
Nominal.morphologyDefiniteness.markingDEF.FIRST	Word.orderClitic.pronouns.finite.verbVO	34	29	11	0.467273
ALIGNMENTPronoun..Simple.PastP.PST.A.O.	Nominal.morphologyCase.markingCASE.LAST	19	34	7	0.465543
Nominal.morphologyNominal.cases.7.Cases	Word.orderNoun.relative.clauseRelN	26	23	7	0.464974
Verbal.morphologypresent.progressive..APROG.A.AGR.FULL	Verbal.morphologysimple.PAST..APST.A.Gender.AGR	82	10	9	0.464747
Nominal.morphologyNominal.casesGEN.DAT	Word.orderMain.clausesVSO	77	12	10	0.464306
Nominal.morphologyDefiniteness.markingDEF.FIRST	Word.orderInfinitiveVO	34	53	21	0.462113
TENSEFutureFUT.Particle	Word.orderClitic.pronouns.participleOV	16	28	5	0.460852
ALIGNMENTPronoun..Simple.PastP.PST.A.O.	Verbal.morphologysimple.PAST..APST.A.AGR.FULL	19	59	12	0.460143
Word.orderClitic.pronouns.infinitiveVO	Word.orderNoun.PossessorN.Poss	20	58	13	0.458109
Verbal.morphologysimple.PAST..DATPST.DAT.AGR.FULL	Word.orderSubordinate.clauseSOV	10	81	9	0.456398
Word.orderMain.clausesV2	Word.orderSubordinate.clauseVSO	34	16	6	0.455844
Nominal.morphologyNominal.casesOBL.Cases	Word.orderNoun.relative.clauseRelN	75	23	20	0.455405
Nominal.morphologyDefiniteness.markingDEF.ART	Word.orderClitic.pronouns.participleVO	61	24	16	0.453474
ALIGNMENTVerb..Simple.PastV.PST.A.O.	Word.orderClitic.pronouns.finite.verbVO	16	29	5	0.453206
TENSEFutureFUT.Particle	Verbal.morphologysimple.PAST..APST.NO.A.AGR	16	29	5	0.45316
Nominal.morphologyNominal.casesAGG.CASE.NR	Verbal.morphologysimple.PAST..OPST.O.Gender.AGR	50	13	7	0.452544
Verbal.morphologypresent.progressive..APROG.A.AGR.FULL	Verbal.morphologypresent.progressive..DATPROG.DAT.AGR.FULL	82	9	8	0.452325
ALIGNMENTCompare.PROG.PASTPROG_A.PST_O	ALIGNMENTNoun..Present.ProgressiveN.PROG.A.O.	30	44	14	0.450883
Nominal.morphologyCase.markingCASE.ART	Word.orderSubordinate.clauseVSO	45	16	8	0.449525
Nominal.morphologyNominal.casesVOC	TENSEFuturePERF.FUT	60	14	9	0.447429
Word.orderInfinitiveOV	Word.orderMain.clausesSOV	77	67	58	0.446808
ALIGNMENTNoun..Present.ProgressiveN.PROG.A.O.	Word.orderInfinitiveVO	44	53	26	0.445257
Nominal.morphologyDefiniteness.markingDEF.ART	Word.orderMain.clausesV2	61	34	22	0.444241
Verbal.morphologypresent.progressive..DATPROG.DAT.AGR.FULL	Word.orderSubordinate.clauseSOV	9	81	8	0.443975
TENSEFutureFUT.Participle	Word.orderSubordinate.clauseSOV	18	81	16	0.443975
ALIGNMENTPronoun..Simple.PastP.PST.A.O.	Word.orderNoun.relative.clauseRelN	19	23	5	0.44216
ALIGNMENTNoun..Simple.PastN.PST.A.O.	Word.orderClitic.pronouns.infinitiveOV	40	21	9	0.440556
Word.orderClitic.pronouns.participleOV	Word.orderNoun.PossessorN.Poss	28	58	18	0.440139
ALIGNMENTNoun..Present.ProgressiveN.PROG.A.O.	ALIGNMENTVerb..Present.ProgressiveV.PROG..O.So.	44	13	6	0.439833
Nominal.morphologyNominal.cases.7.Cases	Nominal.morphologyNominal.casesGEN.DAT	26	77	21	0.439833
ALIGNMENTNoun..Present.ProgressiveN.PROG..O.So.	Word.orderClitic.pronouns.infinitiveOV	49	21	11	0.438286
Verbal.morphologypresent.progressive..APROG.A.AGR.FULL	Verbal.morphologysimple.PAST..APST.A.AGR.FULL	82	59	51	0.438002
Verbal.morphologysimple.PAST..OPST.O.Gender.AGR	Word.orderNoun.PossessorPoss.N	13	93	13	0.437214
Word.orderInfinitiveOV	Word.orderParticipleOV	77	75	70	0.436907
Verbal.morphologypresent.progressive..OPROG.O.AGR.FULL	Word.orderMain.clausesSOV	7	67	5	0.435662
Nominal.morphologyNominal.casesDAT	Verbal.morphologysimple.PAST..APST.A.Gender.AGR	85	10	9	0.435595
Nominal.morphologyNominal.casesDAT	Verbal.morphologysimple.PAST..DATPST.DAT.AGR.FULL	85	10	9	0.435595
Nominal.morphologyGender.agreementPRED.ADJ	Verbal.morphologysimple.PAST..APST.A.Gender.AGR	73	10	9	0.434761
ALIGNMENTNoun..Simple.PastN.PST.A.O.	Word.orderClitic.pronouns.participleOV	40	28	12	0.433636
Word.orderClitic.pronouns.finite.verbVO	Word.orderSubordinate.clauseVSO	29	16	5	0.432587
Nominal.morphologyCase.markingCASE.ADJ	Nominal.morphologyNominal.casesVOC	68	60	43	0.430954
ALIGNMENTPronoun..Simple.PastP.PST..O.So.	Nominal.morphologyNominal.cases.7.Cases	37	26	10	0.430783
Verbal.morphologypresent.progressive..APROG.A.Gender.AGR	Word.orderNoun.PossessorPoss.N	5	93	5	0.430434
Nominal.morphologyGender...Noun.classANIM	Word.orderNoun.PossessorPoss.N	11	93	11	0.430434
Nominal.morphologyNominal.casesAGGL.CASE	Nominal.morphologyNominal.casesGEN.DAT	45	77	36	0.430263
Nominal.morphologyNominal.casesDAT	Verbal.morphologypresent.progressive..DATPROG.DAT.AGR.FULL	85	9	8	0.423172
Word.orderInfinitiveOV	Word.orderNoun.relative.clauseRelN	77	23	21	0.422308
ALIGNMENTVerb..Present.ProgressiveV.PROG.A.O.	Word.orderParticipleVO	9	59	6	0.422272
ALIGNMENTNoun..Present.ProgressiveN.PROG.A.O.	Word.orderNoun.PossessorN.Poss	44	58	27	0.421018
Verbal.morphologysimple.PAST..OPST.O.Gender.AGR	Word.orderParticipleOV	13	75	11	0.420733
Word.orderMain.clausesSOV	Word.orderParticipleOV	67	75	57	0.419366
Nominal.morphologyCase.markingCASE.LAST	Nominal.morphologyPronominal.CasesOBL.Cases	34	65	23	0.418399
Nominal.morphologyPronominal.CasesAGGL.CASE	Nominal.morphologyPronominal.CasesDAT.O	34	74	26	0.418104
Nominal.morphologyNominal.casesOBL.Cases	Verbal.morphologysimple.PAST..OPST.O.Gender.AGR	75	13	10	0.41736
Nominal.morphologyDefiniteness.markingDEF.ART	Word.orderClitic.pronouns.participleOV	61	28	18	0.417107
Nominal.morphologyDefiniteness.markingADJ.DEF	Nominal.morphologyDefiniteness.markingN.DEF	35	33	12	0.416704
Nominal.morphologyNominal.casesGEN.DAT	Verbal.morphologysimple.PAST..DATPST.DAT.AGR.FULL	77	10	8	0.416658
Verbal.morphologypresent.progressive..APROG.A.AGR.FULL	Verbal.morphologypresent.progressive..OPROG.O.AGR.FULL	82	7	6	0.415957
Nominal.morphologyNominal.casesOBL.Cases	TENSEFutureFUT.Participle	75	18	14	0.414804
Verbal.morphologysimple.PAST..OPST.O.AGR.FULL	Word.orderSubordinate.clauseSOV	14	81	12	0.414434
Word.orderNoun.relative.clauseRelN	Word.orderParticipleOV	23	75	21	0.412257
Nominal.morphologyNominal.casesGEN	Nominal.morphologyPronominal.CasesAGGL.CASE.NR	98	15	15	0.412245
Nominal.morphologyNominal.casesGEN	Nominal.morphologyNominal.casesGEN.DAT	98	77	77	0.412245
ALIGNMENTPronoun..Present.ProgressiveP.PROG..O.So.	Nominal.morphologyNominal.casesAGGL.CASE	24	45	11	0.410391
Word.orderInfinitiveOV	Word.orderSubordinate.clauseSOV	77	81	69	0.410095
ALIGNMENTNoun..Present.ProgressiveN.PROG.A.O.	Nominal.morphologyPreposition.agreementPRON.AGR	44	15	7	0.409497
Nominal.morphologyDefiniteness.markingDEF.ART	Word.orderNoun.PossessorN.Poss	61	58	37	0.409414
Word.orderClitic.pronouns.infinitiveOV	Word.orderNoun.PossessorN.Poss	21	58	13	0.409319
Nominal.morphologyGender.agreementPRED.ADJ	Word.orderSubordinate.clauseV2	73	9	8	0.408546
Verbal.morphologysimple.PAST..OPST.O.AGR.FULL	Word.orderWH.elementWH.V	14	68	11	0.407748
ALIGNMENTPronoun..Simple.PastP.PST.A.O.	Word.orderAdpositionsPost	19	57	11	0.407617
Verbal.morphologypresent.progressive..OPROG.O.AGR.FULL	Word.orderSubordinate.clauseSOV	7	81	6	0.407608
Word.orderSubordinate.clauseV2	Word.orderWH.elementWH.initial	9	92	9	0.40664
ALIGNMENTNoun..Present.ProgressiveN.PROG.A.O.	Word.orderClitic.pronouns.participleVO	44	24	11	0.405465
ALIGNMENTPronoun..Simple.PastP.PST..O.So.	Nominal.morphologyNominal.casesAGG.CASE.NR	37	50	19	0.405105
Word.orderAdpositionsPost	Word.orderInfinitiveOV	57	77	47	0.404933
ALIGNMENTPronoun..Simple.PastP.PST.A.O.	Nominal.morphologyNominal.cases.7.Cases	19	26	5	0.404115
Nominal.morphologyCase.markingCASE.LAST	Nominal.morphologyNominal.cases.7.Cases	34	26	9	0.4032
Word.orderAdpositionsPost	Word.orderNoun.PossessorPoss.N	57	93	55	0.401496
ALIGNMENTNoun..Present.ProgressiveN.PROG.A.O.	Word.orderSubordinate.clauseSVO	44	57	26	0.400669
Nominal.morphologyPronominal.CasesAGGL.CASE	Word.orderNoun.PossessorPoss.N	34	93	33	0.400581
Nominal.morphologyDefiniteness.markingDEF.FIRST	Word.orderNoun.PossessorN.Poss	34	58	21	0.400133
Nominal.morphologyNominal.casesOBL.Cases	Word.orderMain.clausesSOV	75	67	51	0.400077
Nominal.morphologyCase.markingCASE.LAST	Verbal.morphologysimple.PAST..APST.NO.A.AGR	34	29	10	0.399361
Nominal.morphologyNominal.casesGEN	TENSEFuturePERF.FUT	98	14	14	0.398639
Nominal.morphologyGender...Noun.classNEUTR	TENSEFuturePERF.FUT	56	14	8	0.398639
ALIGNMENTPronoun..Present.ProgressiveP.PROG..O.So.	Verbal.morphologysimple.PAST..APST.NO.A.AGR	24	29	7	0.397773
Nominal.morphologyPronominal.CasesOBL.Cases	TENSEFutureFUT.Participle	65	18	12	0.396975
Nominal.morphologyCase.markingCASE.LAST	Word.orderInfinitiveOV	34	77	28	0.396901
Word.orderClitic.pronouns.finite.verbOV	Word.orderInfinitiveVO	30	53	17	0.396587
Nominal.morphologyNominal.casesAGGL.CASE	Verbal.morphologypresent.progressive..APROG.NO.A.AGR	45	11	5	0.395313
Verbal.morphologypresent.progressive..APROG.A.AGR.FULL	Word.orderMain.clausesVSO	82	12	10	0.394612
ALIGNMENTNoun..Present.ProgressiveN.PROG.A.O.	Word.orderClitic.pronouns.infinitiveVO	44	20	9	0.394036
Nominal.morphologyNominal.casesDAT	Nominal.morphologyPronominal.CasesDAT.O	85	74	63	0.393631
ALIGNMENTCompare.PROG.PASTPROG_A.PST_O	Word.orderSubordinate.clauseSOV	30	81	25	0.393043
Nominal.morphologyNominal.casesVOC	Nominal.morphologyPronominal.CasesAGGL.CASE.NR	60	15	9	0.392042
ALIGNMENTVerb..Simple.PastV.PST.A.O.	Word.orderInfinitiveVO	16	53	9	0.389207
Nominal.morphologyNominal.casesGEN.DAT	Verbal.morphologypresent.progressive..DATPROG.DAT.AGR.FULL	77	9	7	0.388487
TENSEFutureFUT.Participle	Verbal.morphologypresent.progressive..APROG.A.AGR.FULL	18	82	15	0.387786
Nominal.morphologyNominal.cases.7.Cases	Nominal.morphologyNominal.casesDAT	26	85	22	0.387507
Nominal.morphologyNominal.casesDAT	Verbal.morphologypresent.progressive..OPROG.O.AGR.FULL	85	7	6	0.386805
Nominal.morphologyDefiniteness.markingDEF.ART	Word.orderClitic.pronouns.infinitiveOV	61	21	13	0.386287
ALIGNMENTNoun..Present.ProgressiveN.PROG.A.O.	Word.orderMain.clausesSVO	44	50	22	0.385262
Nominal.morphologyDefiniteness.markingADJ.DEF	Word.orderAdpositionsPrep	35	100	35	0.385262
Nominal.morphologyNominal.casesGEN	Word.orderSubordinate.clauseV2	98	9	9	0.384846
ALIGNMENTNoun..Present.ProgressiveN.PROG..O.So.	Word.orderClitic.pronouns.participleOV	49	28	14	0.384846
ALIGNMENTNoun..Present.ProgressiveN.PROG..O.So.	Nominal.morphologyDefiniteness.markingDEF.FIRST	49	34	17	0.384846
ALIGNMENTNoun..Present.ProgressiveN.PROG..O.So.	ALIGNMENTPronoun..Simple.PastP.PST..O.So.	49	37	18	0.384846
Nominal.morphologyNominal.casesGEN.DAT	Nominal.morphologyPronominal.CasesOBL.Cases	77	65	50	0.384263
ALIGNMENTVerb..Present.ProgressiveV.PROG.A.O.	Nominal.morphologyGender...Noun.classNEUTR	9	56	5	0.384074
ALIGNMENTVerb..Present.ProgressiveV.PROG.A.O.	Word.orderInfinitiveVO	9	53	5	0.383564
Nominal.morphologyPronominal.CasesDAT.O	Nominal.morphologyPronominal.CasesOBL.Cases	74	65	48	0.383181
ALIGNMENTReflexive.Pronoun.in.trans..ClauseREFL.ref.O	Nominal.morphologyNominal.casesOBL.Cases	5	75	5	0.382992
Nominal.morphologyPronominal.CasesAGGL.CASE.NR	Nominal.morphologyPronominal.CasesDAT.O	15	74	11	0.382992
Nominal.morphologyGender...Noun.classM.F	Verbal.morphologysimple.PAST..OPST.O.Gender.AGR	101	13	13	0.382092
Nominal.morphologyCase.markingCASE.ART	Nominal.morphologyNominal.casesGEN.DAT	45	77	35	0.381614
ALIGNMENTPronoun..Present.ProgressiveP.PROG..O.So.	Verbal.morphologysimple.PAST..APST.A.AGR.FULL	24	59	14	0.380678
Nominal.morphologyGender...Noun.classANIM	Word.orderParticipleOV	11	75	9	0.380336
Word.orderInfinitiveVO	Word.orderNoun.PossessorN.Poss	53	58	33	0.380016
Verbal.morphologysimple.PAST..APST.A.Gender.AGR	Word.orderAdpositionsPrep	10	100	10	0.378436
ALIGNMENTCompare.PROG.PASTPROG_A.PST_O	Nominal.morphologyNominal.casesAGG.CASE.NR	30	50	15	0.378436
ALIGNMENTNoun..Present.ProgressiveN.PROG..O.So.	Verbal.morphologysimple.PAST..APST.NO.A.AGR	49	29	14	0.377153
Nominal.morphologyGender...Noun.classM.F	Verbal.morphologypresent.progressive..APROG.A.Gender.AGR	101	5	5	0.375312
Verbal.morphologysimple.PAST..APST.A.AGR.FULL	Word.orderClitic.pronouns.finite.verb2nd.position	59	12	7	0.373899
Word.orderClitic.pronouns.finite.verb2nd.position	Word.orderMain.clausesSOV	12	67	8	0.373495
Word.orderAdpositionsPost	Word.orderParticipleOV	57	75	46	0.373377
Nominal.morphologyNominal.cases.7.Cases	Nominal.morphologyNominal.casesGEN	26	98	25	0.373024
Nominal.morphologyPronominal.CasesAGGL.CASE.NR	TENSEFutureFUT.Synth	15	68	10	0.372239
ALIGNMENTVerb..Simple.PastV.PST..O.So.	Word.orderAdpositionsPost	32	57	18	0.372017
Word.orderParticipleOV	Word.orderSubordinate.clauseSOV	75	81	67	0.370631
Nominal.morphologyCase.markingCASE.LAST	Word.orderNoun.PossessorPoss.N	34	93	32	0.369809
Nominal.morphologyGender...Noun.classM.F	Verbal.morphologysimple.PAST..APST.A.Gender.AGR	101	10	10	0.368486
Nominal.morphologyPronominal.CasesAGGL.CASE.NR	Word.orderNoun.PossessorPoss.N	15	93	14	0.368221
Verbal.morphologysimple.PAST..APST.A.AGR.FULL	Word.orderClitic.pronouns.infinitive2nd.position	59	12	7	0.367073
Nominal.morphologyNominal.casesAGGL.CASE	Nominal.morphologyNominal.casesGEN	45	98	43	0.366782
Word.orderClitic.pronouns.infinitive2nd.position	Word.orderMain.clausesSOV	12	67	8	0.366669
TENSEFutureFUT.Participle	Word.orderNoun.PossessorPoss.N	18	93	17	0.36645
Word.orderAdpositionsPrep	Word.orderSubordinate.clauseV2	100	9	9	0.364643
Word.orderMain.clausesSVO	Word.orderNoun.adjectiveNA	50	45	22	0.36279
Nominal.morphologyGender...Noun.classNEUTR	TENSEFutureFUT.AUX	56	63	37	0.362412
Nominal.morphologyNominal.casesDAT	Nominal.morphologyPronominal.CasesOBL.Cases	85	65	54	0.362378
Nominal.morphologyGender...Noun.classM.F	Word.orderClitic.pronouns.infinitiveVO	101	20	20	0.361613
Nominal.morphologyNominal.cases.7.Cases	Word.orderMain.clausesSOV	26	67	17	0.360857
ALIGNMENTNoun..Present.ProgressiveN.PROG.A.O.	Nominal.morphologyDefiniteness.markingDEF.ART	44	61	26	0.360245
ALIGNMENTNoun..Simple.PastN.PST..O.So.	Word.orderClitic.pronouns.finite.verbOV	65	30	19	0.359287
Nominal.morphologyDefiniteness.markingDEF.ART	Word.orderAdpositionsPrep	61	100	59	0.358706
Nominal.morphologyDefiniteness.markingN.DEF	Word.orderMain.clausesV2	33	34	11	0.35868
TENSEFutureFUT.Participle	TENSEFutureFUT.Synth	18	68	12	0.358634
Word.orderMain.clausesSVO	Word.orderNoun.PossessorN.Poss	50	58	29	0.357863
ALIGNMENTVerb..Present.ProgressiveV.PROG..O.So.	Word.orderNoun.PossessorPoss.N	13	93	12	0.357171
Nominal.morphologyNominal.cases.7.Cases	Word.orderNoun.PossessorPoss.N	26	93	24	0.357171
Nominal.morphologyPreposition.agreementPRON.AGR	Word.orderNoun.PossessorN.Poss	15	58	9	0.357159
Nominal.morphologyNominal.casesGEN.DAT	Nominal.morphologyPronominal.CasesDAT.O	77	74	55	0.356675
Nominal.morphologyGender...Noun.classM.F	Word.orderSubordinate.clauseV2	101	9	9	0.354693
Nominal.morphologyDefiniteness.markingADJ.DEF	Word.orderInfinitiveVO	35	53	19	0.353662
Verbal.morphologysimple.PAST..APST.A.AGR.FULL	Word.orderClitic.pronouns.participle2nd.position	59	12	7	0.353279
Word.orderClitic.pronouns.participle2nd.position	Word.orderMain.clausesSOV	12	67	8	0.352876
ALIGNMENTVerb..Present.ProgressiveV.PROG..O.So.	Nominal.morphologyGender...Noun.classNEUTR	13	56	7	0.352821
Nominal.morphologyNominal.cases.7.Cases	Nominal.morphologyNominal.casesVOC	26	60	15	0.352821
Word.orderNoun.PossessorPoss.N	Word.orderNoun.relative.clauseRelN	93	23	23	0.352656
ALIGNMENTPronoun..Simple.PastP.PST..O.So.	Nominal.morphologyNominal.casesAGGL.CASE	37	45	16	0.352221
Nominal.morphologyPronominal.CasesAGGL.CASE	TENSEFutureFUT.Participle	34	18	6	0.351854
ALIGNMENTVerb..Simple.PastV.PST.A.O.	Word.orderParticipleVO	16	59	10	0.350954
Nominal.morphologyCase.markingCASE.LAST	Word.orderParticipleOV	34	75	27	0.350483
Verbal.morphologypresent.progressive..APROG.A.AGR.FULL	Word.orderSubordinate.clauseVSO	82	16	13	0.348675
ALIGNMENTNoun..Simple.PastN.PST..O.So.	Word.orderNoun.adjectiveNA	65	45	28	0.348367
ALIGNMENTNoun..Present.ProgressiveN.PROG.A.O.	ALIGNMENTPronoun..Simple.PastP.PST.A.O.	44	19	8	0.348025
ALIGNMENTPronoun..Simple.PastP.PST.A.O.	Nominal.morphologyNominal.casesGEN.DAT	19	77	14	0.348025
Word.orderAdpositionsPrep	Word.orderNoun.PossessorN.Poss	100	58	57	0.347251
Verbal.morphologypresent.progressive..APROG.A.AGR.FULL	Verbal.morphologysimple.PAST..DATPST.DAT.AGR.FULL	82	10	8	0.346964
TENSEFuturePERF.FUT	Verbal.morphologysimple.PAST..APST.A.AGR.FULL	14	59	8	0.346453
ALIGNMENTPronoun..Present.ProgressiveP.PROG..O.So.	Nominal.morphologyPronominal.CasesOBL.Cases	24	65	15	0.346042
ALIGNMENTPronoun..Simple.PastP.PST..O.So.	TENSEFutureFUT.Synth	37	68	24	0.34484
Nominal.morphologyNominal.casesAGGL.CASE	Word.orderNoun.PossessorPoss.N	45	93	41	0.344123
TENSEFutureFUT.AUX	Word.orderSubordinate.clauseV2	63	9	6	0.343982
ALIGNMENTCompare.PROG.PASTPROG_A.PST_O	ALIGNMENTNoun..Present.ProgressiveN.PROG..O.So.	30	49	14	0.343252
Nominal.morphologyPronominal.CasesDAT.O	TENSEFuturePERF.FUT	74	14	10	0.343069
ALIGNMENTPronoun..Simple.PastP.PST.A.O.	Nominal.morphologyDefiniteness.markingN.DEF	19	33	6	0.341246
Nominal.morphologyNominal.casesDAT	Nominal.morphologyPronominal.Cases.7.Cases	85	11	9	0.340285
Nominal.morphologyNominal.casesAGG.CASE.NR	Word.orderNoun.PossessorPoss.N	50	93	46	0.340227
Verbal.morphologypresent.progressive..APROG.A.AGR.FULL	Word.orderClitic.pronouns.infinitiveVO	82	20	16	0.340091
ALIGNMENTNoun..Present.ProgressiveN.PROG.A.O.	Word.orderParticipleVO	44	59	27	0.339385
ALIGNMENTVerb..Present.ProgressiveV.PROG.A.O.	Word.orderSubordinate.clauseSVO	9	57	5	0.338975
ALIGNMENTNoun..Simple.PastN.PST.A.O.	Verbal.morphologysimple.PAST..APST.NO.A.AGR	40	29	11	0.338932
Nominal.morphologyCase.markingCASE.ART	Nominal.morphologyNominal.casesDAT	45	85	37	0.338338
Nominal.morphologyNominal.casesGEN.DAT	Word.orderSubordinate.clauseVSO	77	16	12	0.338326
Nominal.morphologyNominal.casesO.case	Word.orderSubordinate.clauseV2	102	9	9	0.338061
Nominal.morphologyDefiniteness.markingADJ.DEF	Word.orderWH.elementWH.initial	35	92	32	0.337647
ALIGNMENTNoun..Present.ProgressiveN.PROG..O.So.	Word.orderInfinitiveVO	49	53	26	0.337627
Nominal.morphologyNominal.casesAGGL.CASE	Verbal.morphologysimple.PAST..OPST.O.AGR.FULL	45	14	6	0.336472
ALIGNMENTPronoun..Simple.PastP.PST..O.So.	Nominal.morphologyNominal.casesVOC	37	60	21	0.336472
Verbal.morphologypresent.progressive..APROG.A.AGR.FULL	Verbal.morphologysimple.PAST..OPST.O.AGR.FULL	82	14	11	0.335772
Verbal.morphologypresent.progressive..APROG.NO.A.AGR	Word.orderNoun.PossessorPoss.N	11	93	10	0.335124
ALIGNMENTVerb..Present.ProgressiveV.PROG..O.So.	Word.orderAdpositionsPost	13	57	7	0.335122
Word.orderMain.clausesV2	Word.orderWH.elementWH.initial	34	92	31	0.334885
ALIGNMENTCompare.PROG.PASTPROG_A.PST_O	Nominal.morphologyNominal.casesVOC	30	60	17	0.334884
ALIGNMENTPronoun..Present.ProgressiveP.PROG..O.So.	Nominal.morphologyNominal.casesOBL.Cases	24	75	17	0.334884
Nominal.morphologyDefiniteness.markingDEF.ART	Word.orderMain.clausesSVO	61	50	29	0.334832
Nominal.morphologyDefiniteness.markingDEF.FIRST	Word.orderAdpositionsPrep	34	100	33	0.33479
TENSEFutureFUT.AUX	Word.orderInfinitiveVO	63	53	36	0.334503
ALIGNMENTCompare.PROG.PASTPAST_A.PROG_O	Word.orderMain.clausesSOV	11	67	7	0.333755
Nominal.morphologyNominal.casesVOC	Nominal.morphologyPronominal.CasesOBL.Cases	60	65	37	0.332619
Verbal.morphologypresent.progressive..APROG.A.AGR.FULL	Word.orderNoun.adjectiveNA	82	45	35	0.332399
ALIGNMENTPronoun..Simple.PastP.PST..O.So.	Word.orderSubordinate.clauseSOV	37	81	29	0.331742
Nominal.morphologyNominal.casesDAT	Nominal.morphologyPronominal.CasesAGGL.CASE.NR	85	15	12	0.331417
Nominal.morphologyPreposition.agreementPRON.AGR	TENSEFutureFUT.Synth	15	68	10	0.330854
ALIGNMENTPronoun..Present.ProgressiveP.PROG.A.O.	Verbal.morphologysimple.PAST..APST.NO.A.AGR	22	29	6	0.330633
ALIGNMENTNoun..Present.ProgressiveN.PROG.A.O.	Verbal.morphologysimple.PAST..APST.NO.A.AGR	44	29	12	0.330633
Word.orderParticipleVO	Word.orderSubordinate.clauseVSO	59	16	10	0.330335
TENSEFutureFUT.Synth	Word.orderNoun.relative.clauseRelN	68	23	16	0.330242
TENSEFutureFUT.Participle	Word.orderClitic.pronouns.finite.verbVO	18	29	5	0.328597
Nominal.morphologyPronominal.Cases.7.Cases	Word.orderNoun.PossessorPoss.N	11	93	10	0.328298
Nominal.morphologyDefiniteness.markingN.DEF	Nominal.morphologyNominal.casesAGGL.CASE	33	45	14	0.32632
Nominal.morphologyNominal.casesDAT	Nominal.morphologyNominal.casesGEN	85	98	78	0.326302
Nominal.morphologyNominal.casesAGG.CASE.NR	Verbal.morphologysimple.PAST..APST.A.AGR.FULL	50	59	28	0.326251
Nominal.morphologyNominal.cases.7.Cases	Nominal.morphologyNominal.casesO.case	26	102	25	0.326239
ALIGNMENTPronoun..Simple.PastP.PST.A.O.	Word.orderNoun.adjectiveNA	19	45	8	0.325552
Word.orderAdpositionsPrep	Word.orderMain.clausesV2	100	34	32	0.324638
Nominal.morphologyCase.markingCASE.N	Verbal.morphologysimple.PAST..OPST.O.Gender.AGR	107	13	13	0.324383
Nominal.morphologyCase.markingCASE.N	Nominal.morphologyPronominal.CasesAGGL.CASE.NR	107	15	15	0.324383
Nominal.morphologyCase.markingCASE.ART	Nominal.morphologyDefiniteness.markingDEF.FIRST	45	34	15	0.324362
Nominal.morphologyPreposition.agreementPRON.AGR	Word.orderWH.elementWH.initial	15	92	14	0.32366
Word.orderNoun.PossessorN.Poss	Word.orderParticipleVO	58	59	36	0.323414
Word.orderAdpositionsPrep	Word.orderNoun.adjectiveNA	100	45	42	0.323049
Nominal.morphologyPronominal.CasesAGGL.CASE	Word.orderInfinitiveOV	34	77	26	0.322793
Nominal.morphologyCase.markingCASE.ADJ	Word.orderMain.clausesV2	68	34	22	0.322001
Nominal.morphologyNominal.casesGEN.DAT	Nominal.morphologyPronominal.Cases.7.Cases	77	11	8	0.321347
ALIGNMENTNoun..Simple.PastN.PST.A.O.	ALIGNMENTVerb..Simple.PastV.PST..O.So.	40	32	12	0.320724
Word.orderMain.clausesV2	Word.orderNoun.PossessorN.Poss	34	58	19	0.320669
Nominal.morphologyNominal.casesAGGL.CASE	Nominal.morphologyPronominal.CasesDAT.O	45	74	31	0.320472
Nominal.morphologyPronominal.Cases.7.Cases	Word.orderMain.clausesSOV	11	67	7	0.320149
Word.orderMain.clausesSOV	Word.orderNoun.PossessorPoss.N	67	93	60	0.320086
ALIGNMENTVerb..Present.ProgressiveV.PROG.A.O.	Word.orderNoun.PossessorPoss.N	9	93	8	0.319431
Nominal.morphologyPreposition.agreementPRON.AGR	Verbal.morphologypresent.progressive..APROG.A.AGR.FULL	15	82	12	0.319185
Verbal.morphologysimple.PAST..APST.A.AGR.FULL	Word.orderMain.clausesSOV	59	67	37	0.31912
Nominal.morphologyGender...Noun.classANIM	TENSEFutureFUT.Synth	11	68	7	0.31894
ALIGNMENTPronoun..Simple.PastP.PST.A.O.	TENSEFutureFUT.Synth	19	68	12	0.318172
Nominal.morphologyPronominal.CasesOBL.Cases	Word.orderMain.clausesSOV	65	67	41	0.318145
Nominal.morphologyCase.markingCASE.N	Verbal.morphologypresent.progressive..APROG.A.Gender.AGR	107	5	5	0.317604
Nominal.morphologyCase.markingCASE.N	Nominal.morphologyGender...Noun.classANIM	107	11	11	0.317604
Nominal.morphologyGender...Noun.classNEUTR	Nominal.morphologyNominal.casesGEN.DAT	56	77	40	0.316935
Word.orderAdpositionsPrep	Word.orderClitic.pronouns.finite.verbOV	100	30	28	0.31627
ALIGNMENTPronoun..Present.ProgressiveP.PROG..O.So.	Word.orderMain.clausesSOV	24	67	15	0.315736
ALIGNMENTNoun..Simple.PastN.PST.A.O.	Word.orderAdpositionsPrep	40	100	37	0.314081
TENSEFutureFUT.Particle	Word.orderAdpositionsPrep	16	100	15	0.313898
ALIGNMENTNoun..Present.ProgressiveN.PROG..O.So.	Word.orderNoun.PossessorN.Poss	49	58	27	0.313387
Nominal.morphologyNominal.casesAGG.CASE.NR	Word.orderSubordinate.clauseSOV	50	81	39	0.313297
Nominal.morphologyDefiniteness.markingADJ.DEF	Word.orderWH.elementWH.V	35	68	25	0.312438
Nominal.morphologyGender...Noun.classM.F	Word.orderClitic.pronouns.participleVO	101	24	23	0.312133
Nominal.morphologyCase.markingCASE.ADJ	Nominal.morphologyNominal.casesGEN.DAT	68	77	49	0.312114
Verbal.morphologypresent.progressive..APROG.A.AGR.FULL	Word.orderClitic.pronouns.finite.verbOV	82	30	23	0.31123
Nominal.morphologyCase.markingCASE.N	TENSEFuturePERF.FUT	107	14	14	0.310778
Nominal.morphologyGender.agreementPRED.ADJ	Word.orderClitic.pronouns.infinitiveVO	73	20	16	0.310106
ALIGNMENTPronoun..Present.ProgressiveP.PROG..O.So.	Nominal.morphologyNominal.casesGEN.DAT	24	77	17	0.308566
Nominal.morphologyNominal.casesOBL.Cases	Nominal.morphologyPronominal.CasesDAT.O	75	74	51	0.307485
Nominal.morphologyGender...Noun.classNEUTR	Word.orderClitic.pronouns.finite.verbVO	56	29	15	0.305835
ALIGNMENTCompare.PROG.PASTPROG_A.PST_O	Nominal.morphologyPronominal.CasesOBL.Cases	30	65	18	0.30522
Word.orderNoun.PossessorN.Poss	Word.orderSubordinate.clauseSVO	58	57	32	0.304656
Nominal.morphologyDefiniteness.markingN.DEF	Word.orderSubordinate.clauseVSO	33	16	5	0.303375
ALIGNMENTNoun..Present.ProgressiveN.PROG..O.So.	Nominal.morphologyPronominal.Cases.7.Cases	49	11	5	0.303329
Nominal.morphologyNominal.casesGEN.DAT	Verbal.morphologypresent.progressive..OPROG.O.AGR.FULL	77	7	5	0.303329
Nominal.morphologyNominal.casesGEN	Nominal.morphologyPronominal.Cases.7.Cases	98	11	10	0.303329
Nominal.morphologyNominal.casesAGGL.CASE	Nominal.morphologyNominal.casesDAT	45	85	35	0.303247
Word.orderAdpositionsPrep	Word.orderMain.clausesSVO	100	50	46	0.301881
ALIGNMENTNoun..Present.ProgressiveN.PROG..O.So.	Nominal.morphologyPreposition.agreementPRON.AGR	49	15	7	0.301867
Nominal.morphologyPronominal.Cases.7.Cases	Verbal.morphologysimple.PAST..APST.A.AGR.FULL	11	59	6	0.299933
Nominal.morphologyGender.agreementPRED.ADJ	TENSEFuturePERF.FUT	73	14	11	0.29896
Nominal.morphologyNominal.casesOBL.Cases	Nominal.morphologyNominal.casesVOC	75	60	41	0.298952
ALIGNMENTVerb..Present.ProgressiveV.PROG..O.So.	Nominal.morphologyNominal.casesAGG.CASE.NR	13	50	6	0.298394
Nominal.morphologyNominal.casesGEN.DAT	Nominal.morphologyPronominal.CasesAGGL.CASE	77	34	24	0.29832
Nominal.morphologyNominal.casesO.case	Nominal.morphologyPronominal.CasesAGGL.CASE	102	34	32	0.298055
Word.orderAdpositionsPrep	Word.orderInfinitiveVO	100	53	51	0.298006
ALIGNMENTNoun..Present.ProgressiveN.PROG..O.So.	Word.orderClitic.pronouns.participleVO	49	24	11	0.297834
ALIGNMENTNoun..Simple.PastN.PST.A.O.	ALIGNMENTPronoun..Present.ProgressiveP.PROG.A.O.	40	22	8	0.296732
ALIGNMENTPronoun..Present.ProgressiveP.PROG.A.O.	Nominal.morphologyNominal.casesAGGL.CASE	22	45	9	0.296732
ALIGNMENTPronoun..Present.ProgressiveP.PROG.A.O.	Word.orderNoun.adjectiveNA	22	45	9	0.296732
ALIGNMENTPronoun..Present.ProgressiveP.PROG.A.O.	Nominal.morphologyNominal.casesOBL.Cases	22	75	15	0.296732
Nominal.morphologyNominal.casesGEN.DAT	Nominal.morphologyNominal.casesVOC	77	60	42	0.296732
Nominal.morphologyNominal.casesO.case	Nominal.morphologyPronominal.CasesAGGL.CASE.NR	102	15	14	0.296467
Nominal.morphologyNominal.casesAGGL.CASE	Nominal.morphologyNominal.casesO.case	45	102	42	0.296467
Nominal.morphologyCase.markingCASE.ART	Word.orderWH.elementWH.initial	45	92	40	0.295777
ALIGNMENTPronoun..Simple.PastP.PST.A.O.	Verbal.morphologysimple.PAST..APST.NO.A.AGR	19	29	5	0.294915
Verbal.morphologysimple.PAST..APST.NO.A.AGR	Word.orderAdpositionsPost	29	57	15	0.294915
Verbal.morphologysimple.PAST..APST.NO.A.AGR	Word.orderMain.clausesV2	29	34	9	0.294001
Nominal.morphologyNominal.casesGEN	Verbal.morphologysimple.PAST..APST.A.Gender.AGR	98	10	9	0.293279
Nominal.morphologyNominal.casesGEN	Verbal.morphologysimple.PAST..DATPST.DAT.AGR.FULL	98	10	9	0.293279
Nominal.morphologyNominal.casesAGG.CASE.NR	Nominal.morphologyNominal.casesGEN	50	98	45	0.293279
TENSEFutureFUT.AUX	Word.orderClitic.pronouns.finite.verbVO	63	29	18	0.293142
ALIGNMENTNoun..Present.ProgressiveN.PROG..O.So.	Word.orderSubordinate.clauseSVO	49	57	26	0.293038
Nominal.morphologyCase.markingCASE.ART	Nominal.morphologyGender...Noun.classM.F	45	101	42	0.29262
Nominal.morphologyNominal.casesGEN	Nominal.morphologyPronominal.CasesOBL.Cases	98	65	58	0.291521
Nominal.morphologyCase.markingCASE.N	Nominal.morphologyNominal.casesVOC	107	60	58	0.290482
ALIGNMENTNoun..Simple.PastN.PST.A.O.	Nominal.morphologyDefiniteness.markingN.DEF	40	33	12	0.289952
ALIGNMENTPronoun..Present.ProgressiveP.PROG.A.O.	Nominal.morphologyPronominal.CasesOBL.Cases	22	65	13	0.289952
Nominal.morphologyCase.markingCASE.LAST	TENSEFutureFUT.Synth	34	68	21	0.289087
Nominal.morphologyPronominal.CasesAGGL.CASE	TENSEFutureFUT.Synth	34	68	21	0.289087
Nominal.morphologyNominal.casesDAT	Nominal.morphologyNominal.casesVOC	85	60	46	0.288858
TENSEFutureFUT.AUX	Word.orderMain.clausesV2	63	34	21	0.288228
ALIGNMENTVerb..Present.ProgressiveV.PROG..O.So.	Word.orderWH.elementWH.V	13	68	9	0.287965
ALIGNMENTVerb..Present.ProgressiveV.PROG.A.O.	Verbal.morphologysimple.PAST..OPST.NO.O.AGR	9	111	9	0.287682
ALIGNMENTPronoun..Present.ProgressiveP.PROG..O.So.	Word.orderSubordinate.clauseSOV	24	81	18	0.287682
Nominal.morphologyPronominal.CasesAGGL.CASE	TENSEFutureFUT.Particle	34	16	5	0.287316
ALIGNMENTNoun..Present.ProgressiveN.PROG..O.So.	Word.orderClitic.pronouns.infinitiveVO	49	20	9	0.286406
Nominal.morphologyNominal.casesO.case	Verbal.morphologysimple.PAST..OPST.O.Gender.AGR	102	13	12	0.285417
Nominal.morphologyDefiniteness.markingDEF.ART	Word.orderClitic.pronouns.finite.verbVO	61	29	16	0.284852
Verbal.morphologysimple.PAST..APST.NO.A.AGR	Word.orderWH.elementWH.V	29	68	20	0.284126
ALIGNMENTCompare.PROG.PASTPROG_A.PST_O	Nominal.morphologyNominal.cases.7.Cases	30	26	7	0.283829
Nominal.morphologyNominal.casesAGG.CASE.NR	Nominal.morphologyNominal.casesGEN.DAT	50	77	35	0.283126
Nominal.morphologyNominal.casesO.case	Nominal.morphologyNominal.casesOBL.Cases	102	75	69	0.282078
Word.orderMain.clausesVSO	Word.orderParticipleVO	12	59	7	0.281961
Nominal.morphologyGender.agreementPRED.ADJ	Word.orderClitic.pronouns.finite.verbOV	73	30	23	0.281245
ALIGNMENTVerb..Simple.PastV.PST.A.O.	Verbal.morphologysimple.PAST..OPST.NO.O.AGR	16	111	16	0.280902
Nominal.morphologyNominal.casesGEN	Verbal.morphologypresent.progressive..DATPROG.DAT.AGR.FULL	98	9	8	0.280856
Nominal.morphologyCase.markingCASE.ADJ	TENSEFutureFUT.Particle	68	16	10	0.28049
Nominal.morphologyNominal.casesGEN	Nominal.morphologyPronominal.CasesAGGL.CASE	98	34	30	0.280302
Nominal.morphologyNominal.casesDAT	Nominal.morphologyNominal.casesOBL.Cases	85	75	57	0.280124
Verbal.morphologysimple.PAST..OPST.O.Gender.AGR	Word.orderNoun.adjectiveAN	13	112	13	0.278713
Nominal.morphologyPronominal.CasesAGGL.CASE.NR	Word.orderNoun.adjectiveAN	15	112	15	0.278713
Nominal.morphologyNominal.casesO.case	Nominal.morphologyPronominal.CasesOBL.Cases	102	65	60	0.278637
ALIGNMENTReflexive.Pronoun.in.trans..ClauseREFL.ref.O	Word.orderSubordinate.clauseSOV	5	81	5	0.278632
ALIGNMENTNoun..Present.ProgressiveN.PROG..O.So.	Word.orderMain.clausesSVO	49	50	22	0.277632
Nominal.morphologyCase.markingCASE.LAST	Verbal.morphologysimple.PAST..APST.A.AGR.FULL	34	59	18	0.276906
Nominal.morphologyNominal.casesAGG.CASE.NR	Verbal.morphologypresent.progressive..APROG.NO.A.AGR	50	11	5	0.276347
Nominal.morphologyPronominal.Cases.7.Cases	Word.orderMain.clausesSVO	11	50	5	0.276347
Verbal.morphologysimple.PAST..OPST.O.AGR.FULL	Word.orderNoun.PossessorPoss.N	14	93	12	0.276283
Nominal.morphologyCase.markingCASE.ADJ	Nominal.morphologyGender...Noun.classM.F	68	101	62	0.276113
Nominal.morphologyNominal.casesDAT	Word.orderSubordinate.clauseV2	85	9	7	0.275848
ALIGNMENTNoun..Present.ProgressiveN.PROG.A.O.	Nominal.morphologyDefiniteness.markingN.DEF	44	33	13	0.274685
Nominal.morphologyDefiniteness.markingDEF.ART	Word.orderWH.elementWH.initial	61	92	52	0.274408
ALIGNMENTCompare.PROG.PASTPROG_A.PST_O	Nominal.morphologyNominal.casesAGGL.CASE	30	45	12	0.274259
ALIGNMENTCompare.PROG.PASTPROG_A.PST_O	Nominal.morphologyNominal.casesOBL.Cases	30	75	20	0.274259
ALIGNMENTVerb..Simple.PastV.PST.A.O.	Word.orderWH.elementWH.V	16	68	11	0.274216
ALIGNMENTVerb..Simple.PastV.PST..O.So.	Word.orderWH.elementWH.V	32	68	22	0.274216
Verbal.morphologysimple.PAST..APST.A.Gender.AGR	Verbal.morphologysimple.PAST..OPST.NO.O.AGR	10	111	10	0.274076
Nominal.morphologyPronominal.CasesAGGL.CASE	Word.orderParticipleOV	34	75	25	0.273522
Word.orderAdpositionsPrep	Word.orderSubordinate.clauseSVO	100	57	52	0.272836
Verbal.morphologypresent.progressive..APROG.A.Gender.AGR	Word.orderNoun.adjectiveAN	5	112	5	0.271934
ALIGNMENTVerb..Simple.PastV.PST.A.O.	Nominal.morphologyGender...Noun.classNEUTR	16	56	8	0.271934
Nominal.morphologyGender...Noun.classANIM	Word.orderNoun.adjectiveAN	11	112	11	0.271934
Word.orderAdpositionsPrep	Word.orderClitic.pronouns.infinitiveOV	100	21	19	0.27148
Word.orderInfinitiveVO	Word.orderMain.clausesV2	53	34	17	0.271424
Nominal.morphologyCase.markingCASE.N	Nominal.morphologyNominal.casesGEN.DAT	107	77	73	0.271037
ALIGNMENTNoun..Simple.PastN.PST..O.So.	Nominal.morphologyPreposition.agreementPRON.AGR	65	15	9	0.270614
ALIGNMENTPronoun..Present.ProgressiveP.PROG.A.O.	Nominal.morphologyNominal.casesGEN.DAT	22	77	15	0.270415
Nominal.morphologyDefiniteness.markingADJ.DEF	Nominal.morphologyNominal.casesGEN.DAT	35	77	24	0.269333
Nominal.morphologyNominal.casesGEN	Nominal.morphologyNominal.casesOBL.Cases	98	75	65	0.269144
Nominal.morphologyGender...Noun.classM.F	Nominal.morphologyGender...Noun.classNEUTR	101	56	50	0.268763
Verbal.morphologypresent.progressive..APROG.A.AGR.FULL	Word.orderClitic.pronouns.participleVO	82	24	18	0.268632
Nominal.morphologyNominal.casesGEN.DAT	Nominal.morphologyNominal.casesOBL.Cases	77	75	51	0.267744
ALIGNMENTPronoun..Present.ProgressiveP.PROG..O.So.	Nominal.morphologyNominal.casesDAT	24	85	18	0.266879
Nominal.morphologyGender...Noun.classNEUTR	Nominal.morphologyNominal.casesDAT	56	85	42	0.266879
Nominal.morphologyNominal.casesGEN.DAT	Word.orderNoun.relative.clauseRelN	77	23	17	0.266569
ALIGNMENTNoun..Simple.PastN.PST.A.O.	TENSEFutureFUT.AUX	40	63	24	0.266021
Nominal.morphologyPronominal.Cases.7.Cases	Word.orderInfinitiveOV	11	77	8	0.265778
Nominal.morphologyNominal.casesOBL.Cases	Verbal.morphologysimple.PAST..APST.A.AGR.FULL	75	59	39	0.265748
Nominal.morphologyCase.markingCASE.ADJ	Nominal.morphologyCase.markingCASE.N	68	107	65	0.265657
Nominal.morphologyNominal.casesAGGL.CASE	Word.orderSubordinate.clauseSOV	45	81	33	0.265209
Verbal.morphologysimple.PAST..APST.A.Gender.AGR	Word.orderNoun.adjectiveAN	10	112	10	0.265108
TENSEFuturePERF.FUT	Word.orderNoun.adjectiveAN	14	112	14	0.265108
Nominal.morphologyPronominal.CasesOBL.Cases	Verbal.morphologysimple.PAST..APST.A.AGR.FULL	65	59	34	0.264868
TENSEFuturePERF.FUT	Word.orderInfinitiveVO	14	53	7	0.264598
Nominal.morphologyDefiniteness.markingADJ.DEF	Word.orderParticipleVO	35	59	20	0.261342
Nominal.morphologyCase.markingCASE.N	Nominal.morphologyNominal.casesGEN	107	98	92	0.261205
Nominal.morphologyPronominal.CasesAGGL.CASE	Word.orderSubordinate.clauseSOV	34	81	25	0.2611
TENSEFutureFUT.Synth	Word.orderAdpositionsPost	68	57	34	0.261014
ALIGNMENTCompare.PROG.PASTPROG_A.PST_O	Nominal.morphologyPronominal.CasesAGGL.CASE	30	34	9	0.260099
Nominal.morphologyNominal.casesDAT	Word.orderClitic.pronouns.finite.verb2nd.position	85	12	9	0.260099
Nominal.morphologyNominal.casesDAT	Word.orderMain.clausesVSO	85	12	9	0.260099
ALIGNMENTPronoun..Present.ProgressiveP.PROG.A.O.	Word.orderMain.clausesSOV	22	67	13	0.259647
Nominal.morphologyCase.markingCASE.ADJ	Nominal.morphologyNominal.casesO.case	68	102	62	0.259481
Word.orderInfinitiveVO	Word.orderWH.elementWH.initial	53	92	47	0.258324
Nominal.morphologyDefiniteness.markingADJ.DEF	Word.orderClitic.pronouns.finite.verbVO	35	29	9	0.258234
Word.orderNoun.PossessorN.Poss	Word.orderWH.elementWH.initial	58	92	50	0.25822
Word.orderMain.clausesV2	Word.orderWH.elementWH.V	34	68	23	0.258044
ALIGNMENTVerb..Simple.PastV.PST..O.So.	Word.orderMain.clausesSOV	32	67	19	0.257663
ALIGNMENTPronoun..Present.ProgressiveP.PROG.A.O.	Word.orderSubordinate.clauseSOV	22	81	16	0.25691
Nominal.morphologyNominal.casesAGGL.CASE	Word.orderInfinitiveOV	45	77	32	0.25691
Nominal.morphologyCase.markingCASE.ADJ	Nominal.morphologyNominal.casesGEN	68	98	59	0.256669
Nominal.morphologyNominal.casesO.case	Nominal.morphologyPronominal.Cases.7.Cases	102	11	10	0.256544
ALIGNMENTNoun..Simple.PastN.PST..O.So.	Word.orderClitic.pronouns.participleVO	65	24	14	0.25643
Nominal.morphologyNominal.casesGEN.DAT	Nominal.morphologyNominal.casesO.case	77	102	69	0.255761
Word.orderInfinitiveVO	Word.orderNoun.adjectiveNA	53	45	22	0.25573
Nominal.morphologyPronominal.Cases.7.Cases	Word.orderParticipleOV	11	75	8	0.255727
Nominal.morphologyCase.markingCASE.N	Nominal.morphologyNominal.casesAGGL.CASE	107	45	42	0.255391
Nominal.morphologyCase.markingCASE.N	Nominal.morphologyNominal.casesOBL.Cases	107	75	70	0.255391
TENSEFuturePERF.FUT	Word.orderParticipleVO	14	59	8	0.254516
Nominal.morphologyCase.markingCASE.N	Nominal.morphologyPronominal.CasesOBL.Cases	107	65	61	0.25409
Nominal.morphologyCase.markingCASE.ART	Word.orderAdpositionsPrep	45	100	40	0.253781
Nominal.morphologyCase.markingCASE.ART	Nominal.morphologyNominal.casesVOC	45	60	24	0.253781
Nominal.morphologyNominal.casesDAT	Word.orderClitic.pronouns.infinitive2nd.position	85	12	9	0.253273
Nominal.morphologyCase.markingCASE.ADJ	Nominal.morphologyNominal.casesDAT	68	85	51	0.253273
Word.orderClitic.pronouns.finite.verbOV	Word.orderParticipleVO	30	59	17	0.252974
ALIGNMENTNoun..Present.ProgressiveN.PROG..O.So.	Nominal.morphologyDefiniteness.markingDEF.ART	49	61	26	0.252615
ALIGNMENTVerb..Simple.PastV.PST.A.O.	Word.orderAdpositionsPrep	16	100	14	0.251731
Nominal.morphologyPronominal.Cases.7.Cases	Verbal.morphologypresent.progressive..APROG.A.AGR.FULL	11	82	8	0.251654
Word.orderNoun.adjectiveAN	Word.orderSubordinate.clauseV2	112	9	9	0.251314
Word.orderAdpositionsPrep	Word.orderClitic.pronouns.participleOV	100	28	25	0.251314
Nominal.morphologyNominal.casesGEN	Nominal.morphologyPronominal.CasesDAT.O	98	74	63	0.251314
Nominal.morphologyCase.markingCASE.N	Nominal.morphologyNominal.casesDAT	107	85	79	0.25118
Nominal.morphologyCase.markingCASE.LAST	Nominal.morphologyPronominal.CasesDAT.O	34	74	22	0.251049
Word.orderClitic.pronouns.infinitiveVO	Word.orderWH.elementWH.initial	20	92	17	0.251041
ALIGNMENTVerb..Simple.PastV.PST..O.So.	Word.orderNoun.relative.clauseRelN	32	23	7	0.250555
ALIGNMENTVerb..Present.ProgressiveV.PROG.A.O.	Word.orderWH.elementWH.V	9	68	6	0.250225
ALIGNMENTPronoun..Simple.PastP.PST..O.So.	Nominal.morphologyPronominal.CasesOBL.Cases	37	65	21	0.24965
Nominal.morphologyDefiniteness.markingN.DEF	Verbal.morphologysimple.PAST..APST.A.AGR.FULL	33	59	17	0.249601
ALIGNMENTPronoun..Simple.PastP.PST.A.O.	Nominal.morphologyNominal.casesDAT	19	85	14	0.249179
Nominal.morphologyCase.markingCASE.ART	Nominal.morphologyNominal.casesGEN	45	98	39	0.248665
Verbal.morphologysimple.PAST..APST.A.AGR.FULL	Word.orderNoun.adjectiveNA	59	45	23	0.248507
Word.orderAdpositionsPrep	Word.orderParticipleVO	100	59	56	0.247919
Nominal.morphologyDefiniteness.markingDEF.FIRST	Word.orderWH.elementWH.initial	34	92	29	0.247575
ALIGNMENTPronoun..Simple.PastP.PST..O.So.	Nominal.morphologyNominal.casesOBL.Cases	37	75	24	0.24686
Nominal.morphologyNominal.casesOBL.Cases	Word.orderNoun.PossessorPoss.N	75	93	62	0.24686
Nominal.morphologyCase.markingCASE.N	Nominal.morphologyNominal.casesO.case	107	102	95	0.246508
Nominal.morphologyNominal.casesO.case	Verbal.morphologysimple.PAST..APST.A.Gender.AGR	102	10	9	0.246494
Nominal.morphologyNominal.casesO.case	Verbal.morphologysimple.PAST..DATPST.DAT.AGR.FULL	102	10	9	0.246494
Nominal.morphologyGender.agreementPRED.ADJ	Word.orderMain.clausesSVO	73	50	37	0.245843
ALIGNMENTNoun..Present.ProgressiveN.PROG.A.O.	Word.orderAdpositionsPrep	44	100	38	0.245439
Nominal.morphologyGender...Noun.classNEUTR	Nominal.morphologyNominal.casesVOC	56	60	29	0.244812
Nominal.morphologyNominal.casesGEN	Verbal.morphologypresent.progressive..OPROG.O.AGR.FULL	98	7	6	0.244488
Nominal.morphologyGender.agreementPRED.ADJ	Word.orderSubordinate.clauseSVO	73	57	43	0.244478
ALIGNMENTNoun..Simple.PastN.PST..O.So.	Word.orderClitic.pronouns.infinitiveOV	65	21	12	0.242731
ALIGNMENTNoun..Simple.PastN.PST.A.O.	Word.orderWH.elementWH.initial	40	92	33	0.241667
Nominal.morphologyNominal.casesGEN.DAT	Word.orderClitic.pronouns.finite.verb2nd.position	77	12	8	0.241162
ALIGNMENTCompare.PROG.PASTPROG_A.PST_O	Word.orderInfinitiveOV	30	77	21	0.241162
Nominal.morphologyNominal.casesDAT	Nominal.morphologyPronominal.CasesAGGL.CASE	85	34	25	0.240297
Nominal.morphologyNominal.casesAGG.CASE.NR	Nominal.morphologyNominal.casesDAT	50	85	37	0.23985
Nominal.morphologyNominal.casesDAT	Word.orderClitic.pronouns.participle2nd.position	85	12	9	0.23948
Word.orderMain.clausesV2	Word.orderParticipleVO	34	59	19	0.239036
ALIGNMENTPronoun..Present.ProgressiveP.PROG..O.So.	TENSEFutureFUT.Synth	24	68	14	0.238708
Nominal.morphologyGender.agreementPRED.ADJ	Word.orderClitic.pronouns.participleVO	73	24	18	0.238647
Nominal.morphologyDefiniteness.markingADJ.DEF	Word.orderNoun.PossessorN.Poss	35	58	18	0.237614
ALIGNMENTPronoun..Present.ProgressiveP.PROG.A.O.	Nominal.morphologyNominal.casesDAT	22	85	16	0.236107
ALIGNMENTNoun..Simple.PastN.PST..O.So.	Word.orderClitic.pronouns.participleOV	65	28	16	0.23581
ALIGNMENTNoun..Simple.PastN.PST..O.So.	Nominal.morphologyDefiniteness.markingDEF.LAST	65	9	5	0.235038
ALIGNMENTVerb..Present.ProgressiveV.PROG..O.So.	Nominal.morphologyNominal.casesAGGL.CASE	13	45	5	0.235038
Nominal.morphologyCase.markingCASE.ART	Nominal.morphologyCase.markingCASE.N	45	107	42	0.234912
Nominal.morphologyNominal.casesGEN	Nominal.morphologyNominal.casesO.case	98	102	86	0.23484
Nominal.morphologyNominal.casesO.case	Word.orderAdpositionsPost	102	57	50	0.234432
Nominal.morphologyNominal.casesGEN.DAT	Word.orderClitic.pronouns.infinitive2nd.position	77	12	8	0.234336
Nominal.morphologyNominal.casesO.case	Verbal.morphologypresent.progressive..DATPROG.DAT.AGR.FULL	102	9	8	0.234071
Nominal.morphologyNominal.casesO.case	TENSEFutureFUT.Participle	102	18	16	0.234071
Nominal.morphologyNominal.casesVOC	Nominal.morphologyPreposition.agreementPRON.AGR	60	15	8	0.232874
TENSEFutureFUT.AUX	Word.orderSubordinate.clauseSVO	63	57	34	0.232756
Nominal.morphologyCase.markingCASE.N	Word.orderAdpositionsPost	107	57	52	0.232576
Nominal.morphologyGender...Noun.classM.F	Word.orderClitic.pronouns.finite.verbOV	101	30	26	0.232211
TENSEFutureFUT.Synth	Word.orderMain.clausesVSO	68	12	7	0.231928
ALIGNMENTNoun..Present.ProgressiveN.PROG..O.So.	Word.orderParticipleVO	49	59	27	0.231754
Nominal.morphologyNominal.casesAGG.CASE.NR	TENSEFutureFUT.Particle	50	16	7	0.231299
ALIGNMENTCompare.PROG.PASTPROG_A.PST_O	Word.orderParticipleOV	30	75	21	0.231112
Nominal.morphologyCase.markingCASE.N	Word.orderClitic.pronouns.finite.verb2nd.position	107	12	11	0.230592
Nominal.morphologyNominal.cases.7.Cases	Word.orderInfinitiveOV	26	77	18	0.230112
Nominal.morphologyNominal.casesGEN	Nominal.morphologyNominal.casesVOC	98	60	50	0.229923
Nominal.morphologyNominal.casesAGGL.CASE	TENSEFutureFUT.Synth	45	68	26	0.229139
Word.orderMain.clausesSVO	Word.orderWH.elementWH.initial	50	92	41	0.228808
Nominal.morphologyNominal.casesOBL.Cases	Word.orderSubordinate.clauseSOV	75	81	53	0.228168
Word.orderInfinitiveOV	Word.orderNoun.PossessorPoss.N	77	93	66	0.227493
Nominal.morphologyCase.markingCASE.ART	Nominal.morphologyNominal.casesO.case	45	102	40	0.227198
Nominal.morphologyNominal.casesDAT	Nominal.morphologyNominal.casesO.case	85	102	74	0.226874
Word.orderMain.clausesVSO	Word.orderSubordinate.clauseSVO	12	57	6	0.226835
ALIGNMENTVerb..Simple.PastV.PST.A.O.	Word.orderSubordinate.clauseSVO	16	57	8	0.226835
Nominal.morphologyCase.markingCASE.ADJ	Word.orderWH.elementWH.initial	68	92	56	0.226277
Nominal.morphologyGender...Noun.classM.F	Word.orderNoun.PossessorN.Poss	101	58	51	0.226075
TENSEFutureFUT.AUX	Word.orderMain.clausesSVO	63	50	29	0.225339
Word.orderAdpositionsPost	Word.orderNoun.adjectiveAN	57	112	54	0.224646
Word.orderMain.clausesSVO	Word.orderSubordinate.clauseVSO	50	16	7	0.224332
Nominal.morphologyCase.markingCASE.N	Word.orderClitic.pronouns.infinitive2nd.position	107	12	11	0.223766
Word.orderAdpositionsPrep	Word.orderWH.elementWH.initial	100	92	81	0.223317
Nominal.morphologyNominal.casesGEN	Word.orderClitic.pronouns.finite.verb2nd.position	98	12	10	0.223144
Nominal.morphologyNominal.casesGEN	Word.orderMain.clausesVSO	98	12	10	0.223144
Word.orderSubordinate.clauseV2	Word.orderWH.elementWH.V	9	68	6	0.222826
ALIGNMENTVerb..Simple.PastV.PST..O.So.	Word.orderNoun.PossessorPoss.N	32	93	26	0.222795
Nominal.morphologyDefiniteness.markingDEF.ART	Nominal.morphologyGender...Noun.classM.F	61	101	52	0.222462
Nominal.morphologyDefiniteness.markingADJ.DEF	Verbal.morphologysimple.PAST..OPST.NO.O.AGR	35	111	33	0.222062
Nominal.morphologyNominal.casesGEN.DAT	Word.orderClitic.pronouns.participle2nd.position	77	12	8	0.220543
Nominal.morphologyNominal.casesO.case	Nominal.morphologyPronominal.CasesDAT.O	102	74	64	0.220278
Word.orderNoun.PossessorPoss.N	Word.orderSubordinate.clauseSOV	93	81	67	0.220058
TENSEFutureFUT.Particle	Word.orderSubordinate.clauseSVO	16	57	8	0.220009
Nominal.morphologyDefiniteness.markingN.DEF	Word.orderNoun.relative.clauseRelN	33	23	7	0.219784
Nominal.morphologyCase.markingCASE.ADJ	Word.orderMain.clausesVSO	68	12	7	0.218323
TENSEFutureFUT.AUX	Word.orderParticipleVO	63	59	37	0.218289
Nominal.morphologyGender.agreementPRED.ADJ	Word.orderInfinitiveVO	73	53	40	0.216745
ALIGNMENTPronoun..Simple.PastP.PST..O.So.	ALIGNMENTVerb..Simple.PastV.PST.A.O.	37	16	5	0.216364
ALIGNMENTVerb..Simple.PastV.PST..O.So.	Word.orderInfinitiveOV	32	77	22	0.216364
Nominal.morphologyNominal.casesGEN	Word.orderClitic.pronouns.infinitive2nd.position	98	12	10	0.216318
Nominal.morphologyNominal.casesGEN	TENSEFutureFUT.Participle	98	18	15	0.216318
Nominal.morphologyGender...Noun.classM.F	Word.orderMain.clausesV2	101	34	29	0.216247
Nominal.morphologyGender...Noun.classNEUTR	Nominal.morphologyNominal.casesGEN	56	98	46	0.215535
Verbal.morphologypresent.progressive..APROG.NO.A.AGR	Word.orderParticipleVO	11	59	6	0.214822
Nominal.morphologyNominal.casesO.case	Word.orderMain.clausesSOV	102	67	58	0.21443
ALIGNMENTNoun..Simple.PastN.PST..O.So.	TENSEFutureFUT.Synth	65	68	37	0.214235
Word.orderSubordinate.clauseSVO	Word.orderWH.elementWH.initial	57	92	47	0.213736
Nominal.morphologyCase.markingCASE.LAST	Word.orderWH.elementWH.V	34	68	22	0.213592
Nominal.morphologyGender...Noun.classM.F	Word.orderNoun.adjectiveNA	101	45	38	0.213015
TENSEFutureFUT.Particle	Verbal.morphologysimple.PAST..APST.A.AGR.FULL	16	59	8	0.212922
Nominal.morphologyNominal.casesDAT	Verbal.morphologysimple.PAST..OPST.O.AGR.FULL	85	14	10	0.211309
Nominal.morphologyDefiniteness.markingADJ.DEF	Nominal.morphologyNominal.casesDAT	35	85	25	0.211309
Nominal.morphologyPronominal.CasesAGGL.CASE	Word.orderNoun.adjectiveAN	34	112	32	0.211309
Word.orderNoun.adjectiveNA	Word.orderSubordinate.clauseSVO	45	57	22	0.211142
Word.orderNoun.adjectiveNA	Word.orderWH.elementWH.initial	45	92	36	0.210895
Nominal.morphologyNominal.casesAGG.CASE.NR	TENSEFuturePERF.FUT	50	14	6	0.21068
Nominal.morphologyCase.markingCASE.N	Word.orderClitic.pronouns.participle2nd.position	107	12	11	0.209973
ALIGNMENTNoun..Simple.PastN.PST.A.O.	ALIGNMENTPronoun..Present.ProgressiveP.PROG..O.So.	40	24	8	0.209721
ALIGNMENTPronoun..Present.ProgressiveP.PROG..O.So.	Word.orderNoun.adjectiveNA	24	45	9	0.209721
Nominal.morphologyNominal.casesAGGL.CASE	Word.orderNoun.adjectiveAN	45	112	42	0.209721
Nominal.morphologyPronominal.CasesDAT.O	TENSEFutureFUT.Particle	74	16	10	0.209538
Word.orderAdpositionsPrep	Word.orderClitic.pronouns.infinitiveVO	100	20	17	0.209045
Word.orderClitic.pronouns.infinitiveOV	Word.orderInfinitiveVO	21	53	10	0.208935
Verbal.morphologysimple.PAST..APST.A.AGR.FULL	Word.orderAdpositionsPost	59	57	28	0.208828
ALIGNMENTVerb..Present.ProgressiveV.PROG..O.So.	Word.orderParticipleVO	13	59	7	0.208698
Nominal.morphologyPronominal.CasesOBL.Cases	Word.orderNoun.adjectiveAN	65	112	61	0.20842
Nominal.morphologyNominal.cases.7.Cases	Word.orderSubordinate.clauseSOV	26	81	18	0.207639
Nominal.morphologyPronominal.CasesOBL.Cases	Word.orderNoun.PossessorPoss.N	65	93	52	0.207291
Nominal.morphologyCase.markingCASE.N	Verbal.morphologysimple.PAST..APST.A.Gender.AGR	107	10	9	0.205417
Nominal.morphologyCase.markingCASE.N	Nominal.morphologyNominal.casesAGG.CASE.NR	107	50	45	0.205417
Verbal.morphologysimple.PAST..APST.NO.A.AGR	Word.orderNoun.PossessorPoss.N	29	93	23	0.205412
Word.orderMain.clausesVSO	Word.orderNoun.relative.clauseNRel	12	110	12	0.205395
Word.orderMain.clausesV2	Word.orderNoun.relative.clauseNRel	34	110	34	0.205395
Nominal.morphologyGender...Noun.classANIM	Nominal.morphologyNominal.casesGEN	11	98	9	0.204794
Nominal.morphologyNominal.casesO.case	Verbal.morphologysimple.PAST..OPST.O.AGR.FULL	102	14	12	0.204529
Nominal.morphologyNominal.casesAGGL.CASE	Verbal.morphologysimple.PAST..APST.A.AGR.FULL	45	59	22	0.204055
Word.orderClitic.pronouns.participleOV	Word.orderMain.clausesSVO	28	50	12	0.203713
ALIGNMENTPronoun..Present.ProgressiveP.PROG.A.O.	Word.orderWH.elementWH.V	22	68	14	0.203704
TENSEFutureFUT.AUX	TENSEFuturePERF.FUT	63	14	8	0.203625
TENSEFutureFUT.Synth	Word.orderClitic.pronouns.finite.verbOV	68	30	17	0.202941
Nominal.morphologyNominal.casesO.case	Nominal.morphologyNominal.casesVOC	102	60	51	0.202941
Verbal.morphologysimple.PAST..APST.A.Gender.AGR	Word.orderNoun.PossessorN.Poss	10	58	5	0.202617
Nominal.morphologyNominal.casesGEN	Word.orderClitic.pronouns.participle2nd.position	98	12	10	0.202524
Nominal.morphologyCase.markingCASE.N	Nominal.morphologyNominal.cases.7.Cases	107	26	23	0.201781
Nominal.morphologyNominal.casesAGG.CASE.NR	Nominal.morphologyPronominal.CasesDAT.O	50	74	31	0.201506
Nominal.morphologyNominal.casesAGG.CASE.NR	Nominal.morphologyNominal.casesO.case	50	102	43	0.201031
Verbal.morphologysimple.PAST..DATPST.DAT.AGR.FULL	Word.orderNoun.PossessorPoss.N	10	93	8	0.200465
Nominal.morphologyCase.markingCASE.LAST	Nominal.morphologyNominal.casesO.case	34	102	29	0.199615
Nominal.morphologyCase.markingCASE.LAST	Nominal.morphologyNominal.casesDAT	34	85	24	0.199475
Word.orderNoun.adjectiveNA	Word.orderParticipleVO	45	59	24	0.199129
Word.orderSubordinate.clauseVSO	Word.orderWH.elementWH.initial	16	92	13	0.199
ALIGNMENTCompare.PROG.PASTPROG_A.PST_O	Word.orderWH.elementWH.V	30	68	19	0.198931
Nominal.morphologyNominal.cases.7.Cases	Word.orderNoun.adjectiveAN	26	112	24	0.198671
Nominal.morphologyCase.markingCASE.ART	Nominal.morphologyPronominal.CasesDAT.O	45	74	28	0.198211
Nominal.morphologyNominal.casesO.case	Verbal.morphologypresent.progressive..OPROG.O.AGR.FULL	102	7	6	0.197703
Nominal.morphologyNominal.casesO.case	TENSEFuturePERF.FUT	102	14	12	0.197703
Nominal.morphologyGender...Noun.classM.F	Nominal.morphologyPreposition.agreementPRON.AGR	101	15	13	0.197606
Verbal.morphologypresent.progressive..APROG.NO.A.AGR	Word.orderWH.elementWH.V	11	68	7	0.196925
Word.orderParticipleVO	Word.orderWH.elementWH.initial	59	92	51	0.196389
Word.orderMain.clausesSVO	Word.orderMain.clausesVSO	50	12	5	0.196161
ALIGNMENTPronoun..Simple.PastP.PST.A.O.	Word.orderWH.elementWH.V	19	68	12	0.196157
Nominal.morphologyNominal.casesOBL.Cases	TENSEFutureFUT.Particle	75	16	10	0.196115
Word.orderNoun.PossessorPoss.N	Word.orderNoun.adjectiveAN	93	112	88	0.196052
Word.orderAdpositionsPrep	Word.orderClitic.pronouns.finite.verbVO	100	29	24	0.19602
Nominal.morphologyDefiniteness.markingDEF.ART	Word.orderNoun.relative.clauseNRel	61	110	60	0.195645
Word.orderClitic.pronouns.finite.verbVO	Word.orderWH.elementWH.initial	29	92	23	0.195457
Nominal.morphologyGender...Noun.classNEUTR	Word.orderAdpositionsPrep	56	100	46	0.195332
Nominal.morphologyNominal.casesOBL.Cases	Word.orderNoun.adjectiveAN	75	112	69	0.195332
ALIGNMENTPronoun..Present.ProgressiveP.PROG.A.O.	Nominal.morphologyDefiniteness.markingN.DEF	22	33	6	0.194642
Nominal.morphologyGender...Noun.classANIM	Nominal.morphologyNominal.casesGEN.DAT	11	77	7	0.194642
Nominal.morphologyCase.markingCASE.ART	Word.orderClitic.pronouns.finite.verbVO	45	29	11	0.193891
Verbal.morphologysimple.PAST..OPST.NO.O.AGR	Word.orderClitic.pronouns.finite.verb2nd.position	111	12	11	0.193891
Nominal.morphologyCase.markingCASE.N	TENSEFutureFUT.Participle	107	18	16	0.192995
Nominal.morphologyGender...Noun.classNEUTR	Word.orderWH.elementWH.initial	56	92	44	0.192876
ALIGNMENTPronoun..Simple.PastP.PST.A.O.	Nominal.morphologyNominal.casesAGGL.CASE	19	45	7	0.192021
Nominal.morphologyPronominal.CasesAGGL.CASE.NR	Word.orderAdpositionsPost	15	57	7	0.192021
Nominal.morphologyCase.markingCASE.ADJ	TENSEFuturePERF.FUT	68	14	8	0.190877
Nominal.morphologyCase.markingCASE.N	Word.orderMain.clausesSOV	107	67	59	0.190449
TENSEFutureFUT.Synth	Word.orderNoun.adjectiveNA	68	45	25	0.189918
ALIGNMENTVerb..Present.ProgressiveV.PROG.A.O.	TENSEFutureFUT.AUX	9	63	5	0.18906
ALIGNMENTVerb..Simple.PastV.PST..O.So.	Nominal.morphologyPronominal.CasesAGGL.CASE	32	34	9	0.188781
ALIGNMENTVerb..Simple.PastV.PST..O.So.	Word.orderMain.clausesV2	32	34	9	0.188781
Nominal.morphologyNominal.casesGEN	Word.orderNoun.relative.clauseRelN	98	23	20	0.187925
Nominal.morphologyNominal.casesVOC	Word.orderMain.clausesSOV	60	67	33	0.187903
Nominal.morphologyDefiniteness.markingADJ.DEF	Nominal.morphologyGender...Noun.classM.F	35	101	29	0.18726
Verbal.morphologysimple.PAST..OPST.NO.O.AGR	Word.orderClitic.pronouns.infinitive2nd.position	111	12	11	0.187065
Word.orderNoun.PossessorPoss.N	Word.orderParticipleOV	93	75	64	0.186671
Nominal.morphologyGender...Noun.classM.F	Word.orderClitic.pronouns.finite.verbVO	101	29	24	0.18607
Nominal.morphologyGender.agreementPRED.ADJ	Verbal.morphologysimple.PAST..OPST.O.Gender.AGR	73	13	9	0.186003
ALIGNMENTPronoun..Present.ProgressiveP.PROG..O.So.	Word.orderWH.elementWH.V	24	68	15	0.185686
Word.orderClitic.pronouns.finite.verb2nd.position	Word.orderInfinitiveOV	12	77	8	0.185592
Nominal.morphologyDefiniteness.markingN.DEF	Verbal.morphologysimple.PAST..OPST.NO.O.AGR	33	111	30	0.185592
TENSEFutureFUT.AUX	Word.orderNoun.PossessorN.Poss	63	58	33	0.185512
Word.orderMain.clausesSVO	Word.orderNoun.relative.clauseNRel	50	110	49	0.185192
Nominal.morphologyGender...Noun.classNEUTR	Word.orderNoun.adjectiveAN	56	112	51	0.185187
Word.orderNoun.relative.clauseNRel	Word.orderSubordinate.clauseV2	110	9	9	0.184776
Word.orderNoun.relative.clauseNRel	Word.orderSubordinate.clauseVSO	110	16	16	0.184776
Nominal.morphologyDefiniteness.markingDEF.FIRST	Word.orderNoun.relative.clauseNRel	34	110	34	0.184776
Nominal.morphologyDefiniteness.markingDEF.ART	Word.orderSubordinate.clauseSVO	61	57	29	0.183184
ALIGNMENTCompare.PROG.PASTPAST_A.PROG_O	Word.orderInfinitiveVO	11	53	5	0.182893
Nominal.morphologyDefiniteness.markingDEF.ART	Word.orderParticipleVO	61	59	32	0.182599
Nominal.morphologyNominal.casesVOC	Word.orderClitic.pronouns.participleVO	60	24	12	0.182322
Word.orderAdpositionsPrep	Word.orderClitic.pronouns.participleVO	100	24	20	0.182322
ALIGNMENTNoun..Simple.PastN.PST.A.O.	Verbal.morphologysimple.PAST..OPST.NO.O.AGR	40	111	36	0.182322
ALIGNMENTNoun..Present.ProgressiveN.PROG..O.So.	TENSEFutureFUT.Synth	49	68	27	0.181721
ALIGNMENTPronoun..Simple.PastP.PST..O.So.	Word.orderWH.elementWH.V	37	68	23	0.180266
ALIGNMENTNoun..Simple.PastN.PST..O.So.	Nominal.morphologyCase.markingCASE.LAST	65	34	18	0.180057
ALIGNMENTNoun..Simple.PastN.PST.A.O.	TENSEFutureFUT.Synth	40	68	22	0.179868
Nominal.morphologyDefiniteness.markingDEF.ART	TENSEFutureFUT.Particle	61	16	8	0.179586
Nominal.morphologyGender...Noun.classM.F	Nominal.morphologyNominal.casesVOC	101	60	49	0.179567
Nominal.morphologyCase.markingCASE.N	Word.orderSubordinate.clauseV2	107	9	8	0.179201
Word.orderClitic.pronouns.infinitive2nd.position	Word.orderInfinitiveOV	12	77	8	0.178766
Nominal.morphologyDefiniteness.markingDEF.LAST	Verbal.morphologypresent.progressive..APROG.A.AGR.FULL	9	82	6	0.178248
Nominal.morphologyPreposition.agreementPRON.AGR	Verbal.morphologysimple.PAST..OPST.NO.O.AGR	15	111	14	0.177304
Nominal.morphologyCase.markingCASE.N	TENSEFutureFUT.Particle	107	16	14	0.177246
TENSEFutureFUT.Synth	Word.orderMain.clausesSOV	68	67	37	0.17715
Verbal.morphologypresent.progressive..APROG.NO.A.AGR	Word.orderNoun.adjectiveAN	11	112	10	0.176624
Nominal.morphologyDefiniteness.markingADJ.DEF	Word.orderNoun.relative.clauseNRel	35	110	34	0.176407
Verbal.morphologypresent.progressive..APROG.NO.A.AGR	Word.orderInfinitiveVO	11	53	5	0.176113
ALIGNMENTPronoun..Simple.PastP.PST.A.O.	Nominal.morphologyNominal.casesGEN	19	98	15	0.175856
Word.orderClitic.pronouns.finite.verb2nd.position	Word.orderParticipleOV	12	75	8	0.175542
Verbal.morphologysimple.PAST..APST.NO.A.AGR	Word.orderInfinitiveOV	29	77	19	0.17498
Nominal.morphologyCase.markingCASE.LAST	Nominal.morphologyNominal.casesGEN	34	98	27	0.174941
Verbal.morphologysimple.PAST..APST.NO.A.AGR	Word.orderClitic.pronouns.infinitiveOV	29	21	5	0.174353
Nominal.morphologyCase.markingCASE.ADJ	Nominal.morphologyPronominal.CasesDAT.O	68	74	41	0.173606
Verbal.morphologysimple.PAST..OPST.NO.O.AGR	Word.orderClitic.pronouns.participle2nd.position	111	12	11	0.173272
Nominal.morphologyCase.markingCASE.ART	Word.orderNoun.PossessorN.Poss	45	58	22	0.173272
Word.orderClitic.pronouns.participleVO	Word.orderWH.elementWH.initial	24	92	19	0.173025
Verbal.morphologypresent.progressive..DATPROG.DAT.AGR.FULL	Word.orderNoun.PossessorPoss.N	9	93	7	0.172294
ALIGNMENTCompare.PROG.PASTPAST_A.PROG_O	TENSEFutureFUT.Synth	11	68	6	0.171569
ALIGNMENTPronoun..Present.ProgressiveP.PROG.A.O.	TENSEFutureFUT.Synth	22	68	12	0.171569
ALIGNMENTCompare.PROG.PASTPROG_A.PST_O	Word.orderNoun.PossessorPoss.N	30	93	23	0.171511
Nominal.morphologyPronominal.CasesA.O	Verbal.morphologysimple.PAST..APST.A.Gender.AGR	123	10	10	0.171422
Nominal.morphologyGender...Noun.classM.F	Word.orderAdpositionsPrep	101	100	81	0.171371
Word.orderAdpositionsPrep	Word.orderNoun.relative.clauseNRel	100	110	96	0.171353
ALIGNMENTNoun..Present.ProgressiveN.PROG.A.O.	TENSEFutureFUT.AUX	44	63	24	0.17071
Verbal.morphologysimple.PAST..APST.NO.A.AGR	Word.orderNoun.adjectiveAN	29	112	26	0.169514
Nominal.morphologyGender...Noun.classNEUTR	Nominal.morphologyNominal.casesO.case	56	102	46	0.168749
Word.orderClitic.pronouns.infinitive2nd.position	Word.orderParticipleOV	12	75	8	0.168716
Nominal.morphologyNominal.casesAGG.CASE.NR	Word.orderInfinitiveOV	50	77	33	0.168716
Nominal.morphologyNominal.casesDAT	Word.orderNoun.relative.clauseRelN	85	23	17	0.167723
Word.orderNoun.PossessorN.Poss	Word.orderNoun.relative.clauseNRel	58	110	57	0.167384
Word.orderNoun.relative.clauseNRel	Word.orderSubordinate.clauseSVO	110	57	56	0.167076
ALIGNMENTNoun..Present.ProgressiveN.PROG..O.So.	Nominal.morphologyDefiniteness.markingN.DEF	49	33	13	0.167054
ALIGNMENTNoun..Present.ProgressiveN.PROG.A.O.	ALIGNMENTPronoun..Simple.PastP.PST..O.So.	44	37	13	0.167054
ALIGNMENTVerb..Present.ProgressiveV.PROG..O.So.	Word.orderMain.clausesSOV	13	67	7	0.166701
Nominal.morphologyDefiniteness.markingDEF.ART	Verbal.morphologysimple.PAST..OPST.NO.O.AGR	61	111	54	0.165792
ALIGNMENTCompare.PROG.PASTPAST_A.PROG_O	Word.orderAdpositionsPost	11	57	5	0.165704
Word.orderClitic.pronouns.participle2nd.position	Word.orderInfinitiveOV	12	77	8	0.164973
ALIGNMENTPronoun..Simple.PastP.PST..O.So.	Word.orderInfinitiveOV	37	77	24	0.164973
TENSEFutureFUT.Synth	Verbal.morphologypresent.progressive..APROG.NO.A.AGR	68	11	6	0.164789
Nominal.morphologyPronominal.CasesA.O	Word.orderClitic.pronouns.infinitiveVO	123	20	20	0.164549
Word.orderClitic.pronouns.infinitiveOV	Word.orderSubordinate.clauseSVO	21	57	10	0.164346
Nominal.morphologyGender...Noun.classNEUTR	Nominal.morphologyPronominal.CasesDAT.O	56	74	33	0.164303
TENSEFutureFUT.AUX	Verbal.morphologypresent.progressive..APROG.NO.A.AGR	63	11	6	0.163931
Nominal.morphologyCase.markingCASE.N	Nominal.morphologyPronominal.CasesDAT.O	107	74	63	0.163453
Nominal.morphologyNominal.casesGEN	Verbal.morphologysimple.PAST..APST.A.AGR.FULL	98	59	46	0.163349
Word.orderClitic.pronouns.finite.verb2nd.position	Word.orderSubordinate.clauseSOV	12	81	8	0.163119
Nominal.morphologyNominal.casesO.case	Word.orderSubordinate.clauseSOV	102	81	68	0.163119
Nominal.morphologyCase.markingCASE.ADJ	Word.orderClitic.pronouns.finite.verbVO	68	29	16	0.162612
Nominal.morphologyNominal.casesO.case	Word.orderNoun.PossessorPoss.N	102	93	78	0.16217
Nominal.morphologyPronominal.CasesAGGL.CASE.NR	Word.orderMain.clausesSVO	15	50	6	0.162119
ALIGNMENTVerb..Present.ProgressiveV.PROG.A.O.	ALIGNMENTVerb..Simple.PastV.PST.A.Sa.	9	125	9	0.162119
ALIGNMENTVerb..Simple.PastV.PST.A.Sa.	Nominal.morphologyDefiniteness.markingDEF.ART	125	61	61	0.162119
Verbal.morphologypresent.progressive..APROG.A.AGR.FULL	Word.orderMain.clausesSVO	82	50	33	0.161418
Verbal.morphologysimple.PAST..APST.A.AGR.FULL	Word.orderSubordinate.clauseSOV	59	81	39	0.161388
Nominal.morphologyCase.markingCASE.ADJ	Word.orderSubordinate.clauseVSO	68	16	9	0.161336
Word.orderClitic.pronouns.finite.verbOV	Word.orderClitic.pronouns.finite.verbVO	30	29	7	0.16107
ALIGNMENTVerb..Present.ProgressiveV.PROG.A.O.	Word.orderNoun.adjectiveAN	9	112	8	0.16093
Nominal.morphologyGender...Noun.classM.F	TENSEFutureFUT.Particle	101	16	13	0.160847
Nominal.morphologyDefiniteness.markingDEF.FIRST	Nominal.morphologyGender...Noun.classM.F	34	101	28	0.160537
ALIGNMENTVerb..Simple.PastV.PST..O.So.	Nominal.morphologyDefiniteness.markingADJ.DEF	32	35	9	0.159794
Nominal.morphologyNominal.casesAGG.CASE.NR	Word.orderNoun.adjectiveAN	50	112	45	0.159747
TENSEFutureFUT.Synth	Word.orderClitic.pronouns.infinitiveVO	68	20	11	0.159389
Verbal.morphologypresent.progressive..APROG.NO.A.AGR	Word.orderAdpositionsPost	11	57	5	0.158924
ALIGNMENTVerb..Present.ProgressiveV.PROG..O.So.	TENSEFutureFUT.Synth	13	68	7	0.158665
Nominal.morphologyCase.markingCASE.LAST	Nominal.morphologyCase.markingCASE.N	34	107	29	0.158539
Nominal.morphologyCase.markingCASE.N	Nominal.morphologyPronominal.CasesAGGL.CASE	107	34	29	0.158539
TENSEFutureFUT.AUX	Word.orderClitic.pronouns.infinitiveVO	63	20	11	0.158531
Nominal.morphologyDefiniteness.markingN.DEF	Nominal.morphologyPronominal.CasesAGGL.CASE	33	34	9	0.158009
Nominal.morphologyGender...Noun.classANIM	Nominal.morphologyNominal.casesO.case	11	102	9	0.158009
Nominal.morphologyPronominal.CasesA.O	Word.orderSubordinate.clauseV2	123	9	9	0.157629
Nominal.morphologyPronominal.CasesAGGL.CASE.NR	Verbal.morphologysimple.PAST..APST.A.AGR.FULL	15	59	7	0.157535
Nominal.morphologyPronominal.CasesAGGL.CASE.NR	Word.orderMain.clausesSOV	15	67	8	0.157131
Word.orderAdpositionsPrep	Word.orderSubordinate.clauseVSO	100	16	13	0.157004
Nominal.morphologyCase.markingCASE.N	Verbal.morphologypresent.progressive..OPROG.O.AGR.FULL	107	7	6	0.156627
Verbal.morphologypresent.progressive..APROG.A.AGR.FULL	Word.orderMain.clausesSOV	82	67	44	0.156431
Nominal.morphologyDefiniteness.markingDEF.ART	Word.orderInfinitiveVO	61	53	27	0.156314
Word.orderClitic.pronouns.infinitive2nd.position	Word.orderSubordinate.clauseSOV	12	81	8	0.156293
ALIGNMENTPronoun..Simple.PastP.PST..O.So.	Nominal.morphologyPronominal.CasesAGGL.CASE	37	34	10	0.155739
Nominal.morphologyNominal.casesO.case	Word.orderInfinitiveOV	102	77	66	0.155739
Nominal.morphologyPronominal.CasesOBL.Cases	Word.orderSubordinate.clauseSOV	65	81	43	0.155397
ALIGNMENTVerb..Simple.PastV.PST.A.Sa.	Word.orderMain.clausesVSO	125	12	12	0.155339
Word.orderClitic.pronouns.participle2nd.position	Word.orderParticipleOV	12	75	8	0.154923
Nominal.morphologyNominal.casesGEN.DAT	Word.orderNoun.adjectiveAN	77	112	68	0.154416
Nominal.morphologyNominal.casesGEN	Word.orderAdpositionsPost	98	57	44	0.153383
Nominal.morphologyNominal.casesDAT	Word.orderSubordinate.clauseVSO	85	16	11	0.152469
Nominal.morphologyGender...Noun.classM.F	Word.orderMain.clausesSVO	101	50	40	0.152169
Verbal.morphologypresent.progressive..APROG.A.AGR.FULL	Word.orderAdpositionsPost	82	57	37	0.15158
Nominal.morphologyNominal.casesOBL.Cases	Word.orderInfinitiveOV	75	77	48	0.15155
Verbal.morphologysimple.PAST..APST.A.AGR.FULL	Word.orderClitic.pronouns.finite.verbOV	59	30	14	0.150755
Nominal.morphologyDefiniteness.markingADJ.DEF	Word.orderNoun.adjectiveAN	35	112	31	0.150573
Nominal.morphologyCase.markingCASE.ART	Verbal.morphologysimple.PAST..OPST.NO.O.AGR	45	111	40	0.149421
ALIGNMENTCompare.PROG.PASTPROG_A.PST_O	TENSEFutureFUT.Synth	30	68	16	0.149096
Nominal.morphologyCase.markingCASE.N	Word.orderNoun.relative.clauseRelN	107	23	21	0.148854
Nominal.morphologyGender...Noun.classNEUTR	Nominal.morphologyPronominal.CasesA.O	56	123	54	0.14866
ALIGNMENTVerb..Simple.PastV.PST.A.Sa.	Verbal.morphologysimple.PAST..APST.A.Gender.AGR	125	10	10	0.148513
Nominal.morphologyNominal.casesAGGL.CASE	Word.orderParticipleOV	45	75	29	0.14842
Nominal.morphologyDefiniteness.markingN.DEF	Word.orderWH.elementWH.V	33	68	20	0.148135
Nominal.morphologyCase.markingCASE.ADJ	Word.orderAdpositionsPrep	68	100	54	0.147913
ALIGNMENTVerb..Simple.PastV.PST..O.So.	Word.orderSubordinate.clauseSOV	32	81	21	0.147371
ALIGNMENTVerb..Present.ProgressiveV.PROG.A.O.	Verbal.morphologysimple.PAST..DATPST.NO.DAT.AGR	9	126	9	0.147325
Nominal.morphologyDefiniteness.markingADJ.DEF	Verbal.morphologysimple.PAST..APST.NO.A.AGR	35	29	8	0.14723
Nominal.morphologyGender...Noun.classM.F	Word.orderSubordinate.clauseVSO	101	16	13	0.147053
Nominal.morphologyCase.markingCASE.LAST	Word.orderNoun.adjectiveAN	34	112	30	0.146771
Nominal.morphologyCase.markingCASE.ADJ	Word.orderClitic.pronouns.infinitiveVO	68	20	11	0.145783
Word.orderClitic.pronouns.finite.verbVO	Word.orderSubordinate.clauseSOV	29	81	19	0.145728
TENSEFutureFUT.AUX	Word.orderWH.elementWH.initial	63	92	51	0.145498
Nominal.morphologyGender.agreementPRED.ADJ	Word.orderParticipleVO	73	59	43	0.145453
ALIGNMENTNoun..Simple.PastN.PST.A.Sa.	ALIGNMENTVerb..Present.ProgressiveV.PROG.A.O.	128	9	9	0.145182
ALIGNMENTNoun..Simple.PastN.PST.A.O.	ALIGNMENTNoun..Simple.PastN.PST.A.Sa.	40	128	40	0.145182
ALIGNMENTNoun..Simple.PastN.PST.A.Sa.	Nominal.morphologyDefiniteness.markingDEF.ART	128	61	61	0.145182
Nominal.morphologyPronominal.CasesAGGL.CASE.NR	Verbal.morphologysimple.PAST..OPST.NO.O.AGR	15	111	13	0.144581
ALIGNMENTPronoun..Simple.PastP.PST.A.O.	Word.orderMain.clausesSOV	19	67	10	0.143886
ALIGNMENTNoun..Present.ProgressiveN.PROG..O.So.	TENSEFutureFUT.AUX	49	63	26	0.143122
ALIGNMENTVerb..Simple.PastV.PST.A.O.	Word.orderNoun.PossessorPoss.N	16	93	12	0.142752
Nominal.morphologyNominal.casesGEN	Word.orderNoun.PossessorPoss.N	98	93	73	0.142706
Word.orderClitic.pronouns.participle2nd.position	Word.orderSubordinate.clauseSOV	12	81	8	0.1425
Nominal.morphologyGender...Noun.classNEUTR	Word.orderNoun.PossessorN.Poss	56	58	26	0.142115
TENSEFutureFUT.AUX	Word.orderAdpositionsPrep	63	100	53	0.141968
ALIGNMENTVerb..Simple.PastV.PST.A.Sa.	Nominal.morphologyCase.markingCASE.ART	125	45	45	0.14164
ALIGNMENTNoun..Present.ProgressiveN.PROG.A.O.	Word.orderClitic.pronouns.finite.verbVO	44	29	10	0.141532
Nominal.morphologyNominal.casesO.case	Word.orderNoun.relative.clauseRelN	102	23	20	0.14114
Verbal.morphologypresent.progressive..APROG.A.Gender.AGR	Verbal.morphologysimple.PAST..DATPST.NO.DAT.AGR	5	126	5	0.140545
Verbal.morphologysimple.PAST..DATPST.NO.DAT.AGR	Word.orderClitic.pronouns.finite.verb2nd.position	126	12	12	0.140545
ALIGNMENTVerb..Simple.PastV.PST.A.O.	Verbal.morphologysimple.PAST..DATPST.NO.DAT.AGR	16	126	16	0.140545
ALIGNMENTReflexive.Pronoun.in.trans..ClauseREFL.ref.O	Word.orderNoun.PossessorPoss.N	5	93	5	0.140482
Nominal.morphologyNominal.casesDAT	Word.orderNoun.adjectiveAN	85	112	74	0.140127
Word.orderClitic.pronouns.finite.verb2nd.position	Word.orderWH.elementWH.initial	12	92	9	0.139577
Word.orderMain.clausesVSO	Word.orderWH.elementWH.initial	12	92	9	0.139577
ALIGNMENTVerb..Present.ProgressiveV.PROG.A.O.	Verbal.morphologypresent.progressive..OPROG.NO.O.AGR	9	127	9	0.13942
ALIGNMENTNoun..Simple.PastN.PST.A.Sa.	Word.orderMain.clausesVSO	128	12	12	0.138402
ALIGNMENTVerb..Simple.PastV.PST.A.O.	Word.orderNoun.adjectiveAN	16	112	14	0.138402
ALIGNMENTNoun..Simple.PastN.PST.A.Sa.	ALIGNMENTVerb..Simple.PastV.PST.A.O.	128	16	16	0.138402
ALIGNMENTNoun..Simple.PastN.PST.A.Sa.	Word.orderMain.clausesSVO	128	50	50	0.138402
Verbal.morphologysimple.PAST..DATPST.NO.DAT.AGR	Verbal.morphologysimple.PAST..OPST.NO.O.AGR	126	111	110	0.138275
Nominal.morphologyNominal.casesO.case	Verbal.morphologysimple.PAST..APST.A.AGR.FULL	102	59	47	0.13807
ALIGNMENTNoun..Present.ProgressiveN.PROG..O.So.	Word.orderAdpositionsPrep	49	100	38	0.137808
Word.orderInfinitiveVO	Word.orderNoun.relative.clauseNRel	53	110	52	0.137556
Verbal.morphologysimple.PAST..OPST.NO.O.AGR	Word.orderAdpositionsPrep	111	100	86	0.136859
Nominal.morphologyGender...Noun.classM.F	Word.orderWH.elementWH.initial	101	92	75	0.136406
Word.orderClitic.pronouns.finite.verbOV	Word.orderNoun.relative.clauseNRel	30	110	28	0.136402
Nominal.morphologyNominal.casesGEN	Word.orderNoun.adjectiveAN	98	112	85	0.136397
TENSEFutureFUT.AUX	Word.orderClitic.pronouns.participleVO	63	24	13	0.136343
ALIGNMENTNoun..Simple.PastN.PST..O.So.	Word.orderNoun.PossessorN.Poss	65	58	30	0.13618
ALIGNMENTCompare.PROG.PASTPAST_A.PROG_O	Word.orderParticipleOV	11	75	7	0.135802
Nominal.morphologyNominal.casesO.case	Word.orderNoun.adjectiveAN	102	112	89	0.135597
Nominal.morphologyCase.markingCASE.ADJ	Nominal.morphologyPronominal.CasesAGGL.CASE.NR	68	15	8	0.13549
Nominal.morphologyCase.markingCASE.N	Word.orderMain.clausesVSO	107	12	10	0.135282
ALIGNMENTVerb..Simple.PastV.PST.A.Sa.	Word.orderMain.clausesSVO	125	50	49	0.135136
ALIGNMENTVerb..Simple.PastV.PST.A.Sa.	Word.orderSubordinate.clauseV2	125	9	9	0.13472
ALIGNMENTVerb..Simple.PastV.PST.A.Sa.	Word.orderSubordinate.clauseVSO	125	16	16	0.13472
ALIGNMENTVerb..Simple.PastV.PST.A.Sa.	Nominal.morphologyDefiniteness.markingDEF.FIRST	125	34	34	0.13472
TENSEFutureFUT.Particle	Word.orderNoun.relative.clauseNRel	16	110	15	0.13403
Verbal.morphologysimple.PAST..APST.A.Gender.AGR	Verbal.morphologysimple.PAST..DATPST.NO.DAT.AGR	10	126	10	0.133719
Verbal.morphologysimple.PAST..DATPST.NO.DAT.AGR	Word.orderClitic.pronouns.infinitive2nd.position	126	12	12	0.133719
ALIGNMENTPronoun..Simple.PastP.PST.A.O.	Nominal.morphologyNominal.casesOBL.Cases	19	75	11	0.13318
Word.orderClitic.pronouns.infinitive2nd.position	Word.orderWH.elementWH.initial	12	92	9	0.132751
Verbal.morphologypresent.progressive..APROG.A.Gender.AGR	Verbal.morphologypresent.progressive..OPROG.NO.O.AGR	5	127	5	0.13264
Verbal.morphologypresent.progressive..OPROG.NO.O.AGR	Word.orderClitic.pronouns.finite.verb2nd.position	127	12	12	0.13264
ALIGNMENTVerb..Simple.PastV.PST.A.O.	Verbal.morphologypresent.progressive..OPROG.NO.O.AGR	16	127	16	0.13264
ALIGNMENTPronoun..Present.ProgressiveP.PROG.A.O.	Verbal.morphologypresent.progressive..APROG.A.AGR.FULL	22	82	14	0.131728
ALIGNMENTNoun..Simple.PastN.PST.A.Sa.	Verbal.morphologysimple.PAST..APST.A.Gender.AGR	128	10	10	0.131576
ALIGNMENTNoun..Simple.PastN.PST.A.Sa.	TENSEFuturePERF.FUT	128	14	14	0.131576
Verbal.morphologypresent.progressive..APROG.NO.A.AGR	Word.orderSubordinate.clauseSVO	11	57	5	0.131525
ALIGNMENTNoun..Simple.PastN.PST.A.O.	Word.orderClitic.pronouns.finite.verbVO	40	29	9	0.131482
Verbal.morphologysimple.PAST..OPST.NO.O.AGR	Word.orderWH.elementWH.initial	111	92	82	0.131228
Nominal.morphologyNominal.casesGEN.DAT	Verbal.morphologysimple.PAST..APST.A.AGR.FULL	77	59	35	0.131217
Verbal.morphologypresent.progressive..OPROG.NO.O.AGR	Verbal.morphologysimple.PAST..OPST.NO.O.AGR	127	111	110	0.13037
Nominal.morphologyDefiniteness.markingDEF.FIRST	Nominal.morphologyPronominal.CasesA.O	34	123	33	0.127776
Nominal.morphologyCase.markingCASE.N	Nominal.morphologyGender...Noun.classNEUTR	107	56	46	0.127673
Nominal.morphologyCase.markingCASE.N	Word.orderNoun.adjectiveAN	107	112	92	0.127673
ALIGNMENTNoun..Simple.PastN.PST.A.Sa.	Verbal.morphologysimple.PAST..OPST.NO.O.AGR	128	111	109	0.127
Nominal.morphologyDefiniteness.markingADJ.DEF	Nominal.morphologyPronominal.CasesDAT.O	35	74	20	0.126752
Verbal.morphologysimple.PAST..APST.NO.A.AGR	Word.orderMain.clausesSOV	29	67	15	0.126494
ALIGNMENTVerb..Simple.PastV.PST.A.Sa.	Nominal.morphologyDefiniteness.markingADJ.DEF	125	35	34	0.126352
Verbal.morphologypresent.progressive..OPROG.NO.O.AGR	Word.orderClitic.pronouns.infinitive2nd.position	127	12	12	0.125814
Verbal.morphologypresent.progressive..OPROG.NO.O.AGR	Verbal.morphologysimple.PAST..APST.A.Gender.AGR	127	10	10	0.125814
ALIGNMENTVerb..Simple.PastV.PST.A.Sa.	Word.orderMain.clausesV2	125	34	33	0.125486
Nominal.morphologyNominal.casesVOC	Nominal.morphologyPronominal.CasesDAT.O	60	74	34	0.125163
ALIGNMENTNoun..Simple.PastN.PST.A.Sa.	Nominal.morphologyCase.markingCASE.ART	128	45	45	0.124703
Nominal.morphologyPronominal.Cases.7.Cases	Word.orderSubordinate.clauseSVO	11	57	5	0.124699
Nominal.morphologyGender...Noun.classM.F	Word.orderParticipleVO	101	59	50	0.12464
ALIGNMENTPronoun..Present.ProgressiveP.PROG..O.So.	Nominal.morphologyNominal.casesGEN	24	98	18	0.124563
Nominal.morphologyDefiniteness.markingDEF.ART	Nominal.morphologyPronominal.CasesAGGL.CASE.NR	61	15	7	0.124198
ALIGNMENTPronoun..Simple.PastP.PST.A.O.	Verbal.morphologypresent.progressive..APROG.A.AGR.FULL	19	82	12	0.124181
Nominal.morphologyCase.markingCASE.ADJ	Word.orderClitic.pronouns.participleVO	68	24	13	0.123595
Word.orderClitic.pronouns.finite.verbVO	Word.orderNoun.adjectiveAN	29	112	25	0.123514
ALIGNMENTCompare.PROG.PASTPAST_A.PROG_O	Word.orderSubordinate.clauseSOV	11	81	7	0.123379
ALIGNMENTPronoun..Simple.PastP.PST..O.So.	Word.orderNoun.PossessorPoss.N	37	93	27	0.122133
Nominal.morphologyCase.markingCASE.N	Word.orderSubordinate.clauseSOV	107	81	68	0.122043
ALIGNMENTPronoun..Simple.PastP.PST.A.Sa.	ALIGNMENTVerb..Present.ProgressiveV.PROG.A.O.	131	9	9	0.122015
ALIGNMENTPronoun..Simple.PastP.PST.A.O.	ALIGNMENTPronoun..Simple.PastP.PST.A.Sa.	19	131	19	0.122015
ALIGNMENTNoun..Simple.PastN.PST.A.O.	ALIGNMENTPronoun..Simple.PastP.PST.A.Sa.	40	131	40	0.122015
ALIGNMENTPronoun..Simple.PastP.PST.A.Sa.	Nominal.morphologyDefiniteness.markingDEF.ART	131	61	61	0.122015
Verbal.morphologysimple.PAST..OPST.NO.O.AGR	Word.orderMain.clausesV2	111	34	29	0.121838
ALIGNMENTPronoun..Simple.PastP.PST..O.So.	Nominal.morphologyNominal.casesDAT	37	85	24	0.121697
Nominal.morphologyNominal.casesVOC	Verbal.morphologysimple.PAST..APST.A.AGR.FULL	60	59	27	0.121167
ALIGNMENTCompare.PROG.PASTPAST_A.PROG_O	Word.orderNoun.PossessorN.Poss	11	58	5	0.120913
Verbal.morphologysimple.PAST..DATPST.NO.DAT.AGR	Word.orderClitic.pronouns.participle2nd.position	126	12	12	0.119926
Word.orderNoun.adjectiveNA	Word.orderNoun.relative.clauseNRel	45	110	41	0.119084
Word.orderClitic.pronouns.finite.verbVO	Word.orderNoun.adjectiveNA	29	45	10	0.119059
Word.orderClitic.pronouns.participle2nd.position	Word.orderWH.elementWH.initial	12	92	9	0.118957
Word.orderClitic.pronouns.participleOV	Word.orderWH.elementWH.initial	28	92	21	0.118957
Nominal.morphologyCase.markingCASE.N	Verbal.morphologysimple.PAST..APST.A.AGR.FULL	107	59	48	0.118047
Verbal.morphologypresent.progressive..OPROG.NO.O.AGR	Verbal.morphologysimple.PAST..DATPST.NO.DAT.AGR	127	126	125	0.117846
ALIGNMENTNoun..Simple.PastN.PST.A.O.	Word.orderSubordinate.clauseVSO	40	16	5	0.117783
ALIGNMENTNoun..Simple.PastN.PST.A.Sa.	Word.orderSubordinate.clauseV2	128	9	9	0.117783
ALIGNMENTNoun..Simple.PastN.PST.A.Sa.	Word.orderSubordinate.clauseVSO	128	16	16	0.117783
ALIGNMENTNoun..Simple.PastN.PST.A.Sa.	Nominal.morphologyDefiniteness.markingDEF.FIRST	128	34	34	0.117783
ALIGNMENTNoun..Simple.PastN.PST.A.Sa.	Word.orderSubordinate.clauseSVO	128	57	57	0.117783
Nominal.morphologyPronominal.CasesDAT.O	Word.orderNoun.adjectiveAN	74	112	63	0.117783
Word.orderClitic.pronouns.finite.verbVO	Word.orderSubordinate.clauseSVO	29	57	13	0.117636
Nominal.morphologyPronominal.CasesAGGL.CASE	Nominal.morphologyPronominal.CasesA.O	34	123	32	0.117624
Nominal.morphologyGender...Noun.classM.F	Word.orderInfinitiveVO	101	53	43	0.11743
Word.orderClitic.pronouns.finite.verbOV	Word.orderWH.elementWH.initial	30	92	22	0.117104
ALIGNMENTVerb..Simple.PastV.PST.A.Sa.	Word.orderSubordinate.clauseSVO	125	57	56	0.11702
ALIGNMENTVerb..Present.ProgressiveV.PROG.A.O.	Verbal.morphologypresent.progressive..DATPROG.NO.DAT.AGR	9	129	9	0.116921
Verbal.morphologypresent.progressive..DATPROG.NO.DAT.AGR	Verbal.morphologysimple.PAST..APST.NO.A.AGR	129	29	29	0.116921
Nominal.morphologyPronominal.CasesOBL.Cases	Word.orderMain.clausesSVO	65	50	25	0.116118
ALIGNMENTNoun..Simple.PastN.PST..O.So.	TENSEFutureFUT.Participle	65	18	9	0.116072
Nominal.morphologyPronominal.CasesAGGL.CASE.NR	Nominal.morphologyPronominal.CasesA.O	15	123	14	0.116035
ALIGNMENTVerb..Simple.PastV.PST..O.So.	Nominal.morphologyNominal.casesAGGL.CASE	32	45	11	0.115929
ALIGNMENTPronoun..Simple.PastP.PST.A.O.	Word.orderSubordinate.clauseSOV	19	81	12	0.115832
Nominal.morphologyPronominal.CasesA.O	Word.orderClitic.pronouns.infinitiveOV	123	21	20	0.115759
ALIGNMENTNoun..Present.ProgressiveN.PROG.A.O.	Word.orderWH.elementWH.initial	44	92	32	0.115585
ALIGNMENTPronoun..Simple.PastP.PST.A.Sa.	Word.orderMain.clausesVSO	131	12	12	0.115235
ALIGNMENTPronoun..Simple.PastP.PST.A.Sa.	Word.orderMain.clausesSVO	131	50	50	0.115235
ALIGNMENTPronoun..Simple.PastP.PST.A.Sa.	ALIGNMENTVerb..Simple.PastV.PST.A.Sa.	131	125	125	0.115235
Nominal.morphologyPronominal.CasesA.O	Nominal.morphologyPronominal.CasesDAT.O	123	74	69	0.115069
Nominal.morphologyCase.markingCASE.ADJ	Verbal.morphologysimple.PAST..OPST.NO.O.AGR	68	111	58	0.115012
Nominal.morphologyCase.markingCASE.N	Word.orderInfinitiveOV	107	77	66	0.114663
Verbal.morphologypresent.progressive..APROG.A.AGR.FULL	Word.orderClitic.pronouns.participleOV	82	28	18	0.114482
Nominal.morphologyDefiniteness.markingDEF.FIRST	TENSEFutureFUT.Synth	34	68	18	0.114317
Nominal.morphologyPronominal.CasesA.O	TENSEFutureFUT.Participle	123	18	17	0.114264
ALIGNMENTNoun..Simple.PastN.PST.A.Sa.	ALIGNMENTPronoun..Simple.PastP.PST.A.Sa.	128	131	127	0.114172
ALIGNMENTNoun..Simple.PastN.PST.A.Sa.	ALIGNMENTVerb..Simple.PastV.PST.A.Sa.	128	125	122	0.11411
Nominal.morphologyCase.markingCASE.ART	Word.orderClitic.pronouns.participleOV	45	28	10	0.113053
Word.orderMain.clausesV2	Word.orderNoun.adjectiveAN	34	112	29	0.112869
Nominal.morphologyNominal.casesGEN	Word.orderMain.clausesSOV	98	67	50	0.112795
Nominal.morphologyGender...Noun.classNEUTR	Verbal.morphologysimple.PAST..OPST.NO.O.AGR	56	111	47	0.112478
Verbal.morphologysimple.PAST..APST.NO.A.AGR	Verbal.morphologysimple.PAST..DATPST.NO.DAT.AGR	29	126	28	0.112233
Nominal.morphologyPronominal.CasesDAT.O	Word.orderNoun.relative.clauseRelN	74	23	14	0.112153
Verbal.morphologypresent.progressive..OPROG.NO.O.AGR	Word.orderClitic.pronouns.participle2nd.position	127	12	12	0.112021
ALIGNMENTNoun..Simple.PastN.PST..O.So.	Word.orderAdpositionsPost	65	57	28	0.111978
Nominal.morphologyGender...Noun.classNEUTR	Nominal.morphologyGender.agreementPRED.ADJ	56	73	36	0.111895
ALIGNMENTVerb..Present.ProgressiveV.PROG..O.So.	Word.orderNoun.adjectiveAN	13	112	11	0.111659
Nominal.morphologyDefiniteness.markingADJ.DEF	Verbal.morphologysimple.PAST..DATPST.NO.DAT.AGR	35	126	34	0.111557
ALIGNMENTNoun..Simple.PastN.PST.A.O.	ALIGNMENTVerb..Simple.PastV.PST.A.Sa.	40	125	38	0.110826
Word.orderClitic.pronouns.participleOV	Word.orderNoun.relative.clauseNRel	28	110	26	0.110668
Nominal.morphologyNominal.casesAGG.CASE.NR	TENSEFutureFUT.Synth	50	68	26	0.110172
Verbal.morphologypresent.progressive..APROG.A.Gender.AGR	Verbal.morphologypresent.progressive..DATPROG.NO.DAT.AGR	5	129	5	0.110142
Verbal.morphologypresent.progressive..APROG.NO.A.AGR	Verbal.morphologypresent.progressive..DATPROG.NO.DAT.AGR	11	129	11	0.110142
Verbal.morphologypresent.progressive..DATPROG.NO.DAT.AGR	Word.orderClitic.pronouns.finite.verb2nd.position	129	12	12	0.110142
ALIGNMENTVerb..Simple.PastV.PST.A.O.	Verbal.morphologypresent.progressive..DATPROG.NO.DAT.AGR	16	129	16	0.110142
Word.orderMain.clausesVSO	Word.orderWH.elementWH.V	12	68	7	0.109913
Nominal.morphologyPronominal.Cases.7.Cases	Word.orderSubordinate.clauseSOV	11	81	7	0.109773
Nominal.morphologyDefiniteness.markingN.DEF	Verbal.morphologysimple.PAST..DATPST.NO.DAT.AGR	33	126	32	0.109773
ALIGNMENTNoun..Simple.PastN.PST.A.Sa.	Nominal.morphologyDefiniteness.markingADJ.DEF	128	35	34	0.109415
Nominal.morphologyPronominal.CasesOBL.Cases	TENSEFutureFUT.Particle	65	16	8	0.109292
ALIGNMENTNoun..Simple.PastN.PST..O.So.	Word.orderClitic.pronouns.infinitiveVO	65	20	10	0.109199
ALIGNMENTNoun..Simple.PastN.PST.A.Sa.	Word.orderMain.clausesV2	128	34	33	0.108549
ALIGNMENTPronoun..Simple.PastP.PST.A.Sa.	Verbal.morphologypresent.progressive..OPROG.O.AGR.FULL	131	7	7	0.108409
ALIGNMENTPronoun..Simple.PastP.PST.A.Sa.	Verbal.morphologypresent.progressive..DATPROG.DAT.AGR.FULL	131	9	9	0.108409
ALIGNMENTPronoun..Simple.PastP.PST.A.Sa.	Verbal.morphologysimple.PAST..APST.A.Gender.AGR	131	10	10	0.108409
ALIGNMENTPronoun..Simple.PastP.PST.A.Sa.	Verbal.morphologysimple.PAST..DATPST.DAT.AGR.FULL	131	10	10	0.108409
ALIGNMENTPronoun..Simple.PastP.PST.A.Sa.	TENSEFuturePERF.FUT	131	14	14	0.108409
Nominal.morphologyDefiniteness.markingADJ.DEF	Nominal.morphologyNominal.casesGEN	35	98	26	0.108214
Nominal.morphologyCase.markingCASE.N	Word.orderNoun.PossessorPoss.N	107	93	77	0.10819
Verbal.morphologypresent.progressive..DATPROG.NO.DAT.AGR	Verbal.morphologysimple.PAST..OPST.NO.O.AGR	129	111	110	0.107872
ALIGNMENTPronoun..Present.ProgressiveP.PROG..O.So.	Nominal.morphologyDefiniteness.markingN.DEF	24	33	6	0.107631
ALIGNMENTNoun..Simple.PastN.PST.A.O.	Word.orderNoun.relative.clauseNRel	40	110	36	0.106814
Nominal.morphologyPronominal.CasesA.O	Word.orderClitic.pronouns.finite.verbVO	123	29	27	0.106789
Verbal.morphologypresent.progressive..APROG.A.AGR.FULL	Word.orderNoun.PossessorN.Poss	82	58	37	0.106789
Nominal.morphologyPronominal.CasesDAT.O	Word.orderMain.clausesSVO	74	50	28	0.106549
ALIGNMENTVerb..Simple.PastV.PST.A.Sa.	Verbal.morphologysimple.PAST..OPST.NO.O.AGR	125	111	105	0.106549
Nominal.morphologyDefiniteness.markingDEF.LAST	Nominal.morphologyPronominal.CasesDAT.O	9	74	5	0.105361
ALIGNMENTPronoun..Simple.PastP.PST.A.Sa.	Verbal.morphologysimple.PAST..APST.A.AGR.FULL	131	59	58	0.104921
ALIGNMENTCompare.PROG.PASTPROG_A.PST_O	ALIGNMENTNoun..Simple.PastN.PST.A.O.	30	40	9	0.10436
ALIGNMENTNoun..Simple.PastN.PST.A.Sa.	Word.orderAdpositionsPrep	128	100	96	0.10436
Verbal.morphologypresent.progressive..OPROG.NO.O.AGR	Verbal.morphologysimple.PAST..APST.NO.A.AGR	127	29	28	0.104328
TENSEFutureFUT.Particle	Word.orderParticipleOV	16	75	10	0.104177
ALIGNMENTPronoun..Simple.PastP.PST.A.Sa.	Verbal.morphologysimple.PAST..OPST.NO.O.AGR	131	111	109	0.103833
Nominal.morphologyDefiniteness.markingADJ.DEF	Verbal.morphologypresent.progressive..OPROG.NO.O.AGR	35	127	34	0.103652
Verbal.morphologypresent.progressive..DATPROG.NO.DAT.AGR	Verbal.morphologysimple.PAST..APST.A.Gender.AGR	129	10	10	0.103316
Verbal.morphologypresent.progressive..DATPROG.NO.DAT.AGR	Word.orderClitic.pronouns.infinitive2nd.position	129	12	12	0.103316
Verbal.morphologypresent.progressive..DATPROG.NO.DAT.AGR	Verbal.morphologysimple.PAST..DATPST.NO.DAT.AGR	129	126	126	0.103316
Verbal.morphologypresent.progressive..DATPROG.NO.DAT.AGR	Verbal.morphologypresent.progressive..OPROG.NO.O.AGR	129	127	127	0.103316
Word.orderNoun.adjectiveAN	Word.orderNoun.relative.clauseRelN	112	23	21	0.103184
Word.orderNoun.relative.clauseNRel	Word.orderParticipleVO	110	59	58	0.103143
ALIGNMENTNoun..Simple.PastN.PST..O.So.	Nominal.morphologyDefiniteness.markingDEF.FIRST	65	34	17	0.102279
Word.orderClitic.pronouns.finite.verbVO	Word.orderMain.clausesSVO	29	50	11	0.102229
TENSEFutureFUT.Synth	Verbal.morphologypresent.progressive..APROG.A.AGR.FULL	68	82	42	0.101875
Nominal.morphologyDefiniteness.markingN.DEF	Verbal.morphologypresent.progressive..OPROG.NO.O.AGR	33	127	32	0.101868
ALIGNMENTPronoun..Simple.PastP.PST.A.Sa.	Nominal.morphologyCase.markingCASE.ART	131	45	45	0.101536
ALIGNMENTCompare.PROG.PASTPROG_A.PST_O	Nominal.morphologyCase.markingCASE.N	30	107	24	0.10124
ALIGNMENTVerb..Simple.PastV.PST..O.So.	Nominal.morphologyDefiniteness.markingN.DEF	32	33	8	0.100851
ALIGNMENTVerb..Simple.PastV.PST.A.Sa.	Word.orderAdpositionsPrep	125	100	94	0.100243
Nominal.morphologyNominal.casesO.case	Word.orderParticipleOV	102	75	63	0.0991689
Nominal.morphologyNominal.casesOBL.Cases	Word.orderParticipleOV	75	75	46	0.0989399
Nominal.morphologyCase.markingCASE.ART	Word.orderNoun.relative.clauseNRel	45	110	41	0.0986056
Nominal.morphologyNominal.casesOBL.Cases	TENSEFutureFUT.Synth	75	68	38	0.0978026
Word.orderClitic.pronouns.infinitiveOV	Word.orderInfinitiveOV	21	77	13	0.0977854
Word.orderAdpositionsPrep	Word.orderClitic.pronouns.finite.verb2nd.position	100	12	9	0.0975803
Word.orderAdpositionsPrep	Word.orderMain.clausesVSO	100	12	9	0.0975803
Verbal.morphologysimple.PAST..APST.A.AGR.FULL	Word.orderNoun.relative.clauseRelN	59	23	11	0.0975185
Nominal.morphologyGender...Noun.classM.F	Nominal.morphologyGender.agreementPRED.ADJ	101	73	64	0.0974902
Nominal.morphologyNominal.casesGEN	Word.orderSubordinate.clauseVSO	98	16	12	0.0971637
Nominal.morphologyDefiniteness.markingADJ.DEF	Nominal.morphologyDefiniteness.markingDEF.ART	35	61	16	0.0967994
Word.orderClitic.pronouns.participleOV	Word.orderInfinitiveVO	28	53	12	0.0966537
Nominal.morphologyNominal.casesO.case	Nominal.morphologyPronominal.CasesA.O	102	123	94	0.0965702
Nominal.morphologyNominal.casesAGG.CASE.NR	Word.orderParticipleOV	50	75	31	0.0961452
Nominal.morphologyGender...Noun.classM.F	Word.orderSubordinate.clauseSVO	101	57	44	0.0958311
Nominal.morphologyGender...Noun.classANIM	Nominal.morphologyNominal.casesDAT	11	85	7	0.0957962
Nominal.morphologyNominal.casesDAT	Word.orderAdpositionsPost	85	57	36	0.0950287
ALIGNMENTVerb..Simple.PastV.PST.A.Sa.	Nominal.morphologyNominal.casesGEN.DAT	125	77	72	0.0949795
Nominal.morphologyGender.agreementPRED.ADJ	Verbal.morphologypresent.progressive..APROG.NO.A.AGR	73	11	7	0.0949628
ALIGNMENTPronoun..Simple.PastP.PST.A.Sa.	Word.orderSubordinate.clauseVSO	131	16	16	0.094616
ALIGNMENTPronoun..Simple.PastP.PST.A.Sa.	Nominal.morphologyDefiniteness.markingDEF.FIRST	131	34	34	0.094616
ALIGNMENTPronoun..Simple.PastP.PST.A.Sa.	Word.orderSubordinate.clauseV2	131	9	9	0.094616
ALIGNMENTPronoun..Simple.PastP.PST.A.Sa.	Word.orderSubordinate.clauseSVO	131	57	57	0.094616
Nominal.morphologyPronominal.CasesAGGL.CASE	Verbal.morphologysimple.PAST..APST.A.AGR.FULL	34	59	15	0.0945848
ALIGNMENTPronoun..Present.ProgressiveP.PROG.A.O.	Nominal.morphologyNominal.casesGEN	22	98	16	0.0937911
TENSEFuturePERF.FUT	Word.orderAdpositionsPost	14	57	6	0.0932575
Verbal.morphologysimple.PAST..APST.A.Gender.AGR	Word.orderNoun.relative.clauseNRel	10	110	9	0.0932084
ALIGNMENTVerb..Simple.PastV.PST.A.Sa.	Word.orderNoun.adjectiveNA	125	45	42	0.093126
Nominal.morphologyPronominal.CasesOBL.Cases	TENSEFutureFUT.Synth	65	68	33	0.0930452
ALIGNMENTNoun..Simple.PastN.PST.A.Sa.	Verbal.morphologysimple.PAST..APST.A.AGR.FULL	128	59	56	0.0929963
ALIGNMENTNoun..Simple.PastN.PST.A.Sa.	Word.orderWH.elementWH.initial	128	92	91	0.0928677
Word.orderClitic.pronouns.infinitiveOV	Word.orderMain.clausesSVO	21	50	8	0.0928502
ALIGNMENTVerb..Simple.PastV.PST.A.Sa.	Nominal.morphologyDefiniteness.markingN.DEF	125	33	31	0.0928188
Word.orderClitic.pronouns.finite.verbVO	Word.orderParticipleVO	29	59	14	0.0927191
Word.orderMain.clausesSOV	Word.orderNoun.adjectiveAN	67	112	56	0.0925928
ALIGNMENTPronoun..Present.ProgressiveP.PROG..O.So.	Word.orderNoun.PossessorPoss.N	24	93	17	0.0923733
Nominal.morphologyNominal.casesAGGL.CASE	Nominal.morphologyNominal.casesVOC	45	60	20	0.0919375
Nominal.morphologyDefiniteness.markingDEF.LAST	Nominal.morphologyNominal.casesOBL.Cases	9	75	5	0.0919375
Word.orderClitic.pronouns.infinitiveOV	Word.orderNoun.relative.clauseNRel	21	110	19	0.0916125
ALIGNMENTVerb..Simple.PastV.PST.A.O.	ALIGNMENTVerb..Simple.PastV.PST.A.Sa.	16	125	15	0.0908006
Word.orderAdpositionsPrep	Word.orderClitic.pronouns.infinitive2nd.position	100	12	9	0.0907544
Word.orderClitic.pronouns.finite.verb2nd.position	Word.orderNoun.adjectiveAN	12	112	10	0.0896122
ALIGNMENTNoun..Simple.PastN.PST.A.Sa.	Word.orderInfinitiveVO	128	53	53	0.0896122
Verbal.morphologypresent.progressive..DATPROG.NO.DAT.AGR	Word.orderClitic.pronouns.participle2nd.position	129	12	12	0.0895224
Nominal.morphologyGender...Noun.classNEUTR	Verbal.morphologysimple.PAST..APST.NO.A.AGR	56	29	12	0.0894714
Word.orderInfinitiveVO	Word.orderMain.clausesVSO	53	12	5	0.0891021
Nominal.morphologyCase.markingCASE.ADJ	Word.orderNoun.adjectiveAN	68	112	57	0.0886513
Nominal.morphologyDefiniteness.markingADJ.DEF	Nominal.morphologyPronominal.CasesA.O	35	123	32	0.0886361
ALIGNMENTVerb..Simple.PastV.PST.A.Sa.	Nominal.morphologyGender...Noun.classNEUTR	125	56	52	0.0880109
Nominal.morphologyNominal.casesDAT	Verbal.morphologysimple.PAST..APST.A.AGR.FULL	85	59	37	0.0879415
Word.orderClitic.pronouns.infinitiveOV	Word.orderParticipleOV	21	75	13	0.0877351
ALIGNMENTNoun..Simple.PastN.PST..O.So.	Word.orderNoun.relative.clauseRelN	65	23	12	0.08768
Nominal.morphologyGender...Noun.classM.F	Word.orderMain.clausesVSO	101	12	9	0.08763
ALIGNMENTVerb..Simple.PastV.PST.A.Sa.	Word.orderInfinitiveVO	125	53	52	0.0875008
Nominal.morphologyCase.markingCASE.ADJ	Nominal.morphologyDefiniteness.markingDEF.ART	68	61	31	0.0872123
Verbal.morphologypresent.progressive..OPROG.O.AGR.FULL	Word.orderNoun.PossessorPoss.N	7	93	5	0.0871359
Nominal.morphologyNominal.casesGEN.DAT	Verbal.morphologysimple.PAST..OPST.O.AGR.FULL	77	14	8	0.0870114
ALIGNMENTCompare.PROG.PASTPAST_A.PROG_O	Verbal.morphologysimple.PAST..OPST.NO.O.AGR	11	111	9	0.0870114
Nominal.morphologyPronominal.CasesAGGL.CASE.NR	Word.orderInfinitiveOV	15	77	9	0.0870114
ALIGNMENTPronoun..Simple.PastP.PST.A.Sa.	Nominal.morphologyDefiniteness.markingADJ.DEF	131	35	34	0.0862477
Nominal.morphologyPronominal.CasesA.O	Word.orderMain.clausesV2	123	34	31	0.0858749
ALIGNMENTPronoun..Simple.PastP.PST.A.Sa.	Word.orderMain.clausesV2	131	34	33	0.0853823
Nominal.morphologyDefiniteness.markingN.DEF	Word.orderNoun.adjectiveNA	33	45	11	0.0851578
Nominal.morphologyPronominal.CasesA.O	Word.orderSubordinate.clauseSVO	123	57	53	0.0848696
ALIGNMENTNoun..Simple.PastN.PST..O.So.	Word.orderSubordinate.clauseSVO	65	57	28	0.0845793
ALIGNMENTNoun..Present.ProgressiveN.PROG.A.O.	TENSEFutureFUT.Synth	44	68	22	0.0845574
ALIGNMENTPronoun..Simple.PastP.PST.A.Sa.	Nominal.morphologyDefiniteness.markingN.DEF	131	33	32	0.0844636
Nominal.morphologyNominal.casesDAT	Word.orderSubordinate.clauseSOV	85	81	52	0.0839566
Word.orderClitic.pronouns.infinitive2nd.position	Word.orderNoun.adjectiveAN	12	112	10	0.0827862
TENSEFutureFUT.Participle	Word.orderNoun.adjectiveAN	18	112	15	0.0827862
ALIGNMENTNoun..Simple.PastN.PST.A.Sa.	Word.orderNoun.PossessorN.Poss	128	58	56	0.0826917
Nominal.morphologyDefiniteness.markingADJ.DEF	Nominal.morphologyGender.agreementPRED.ADJ	35	73	22	0.0826424
Nominal.morphologyNominal.casesGEN.DAT	Word.orderNoun.PossessorPoss.N	77	93	54	0.0823924
Word.orderClitic.pronouns.finite.verbVO	Word.orderInfinitiveVO	29	53	12	0.0821816
Nominal.morphologyCase.markingCASE.ADJ	Nominal.morphologyGender.agreementPRED.ADJ	68	73	43	0.0818144
ALIGNMENTVerb..Simple.PastV.PST.A.Sa.	Word.orderNoun.PossessorN.Poss	125	58	55	0.08161
Nominal.morphologyGender...Noun.classNEUTR	Word.orderInfinitiveVO	56	53	23	0.081493
Nominal.morphologyDefiniteness.markingADJ.DEF	Verbal.morphologypresent.progressive..DATPROG.NO.DAT.AGR	35	129	34	0.0811541
ALIGNMENTPronoun..Simple.PastP.PST..O.So.	Nominal.morphologyCase.markingCASE.N	37	107	29	0.0807614
Nominal.morphologyGender...Noun.classANIM	Nominal.morphologyPronominal.CasesDAT.O	11	74	6	0.0802317
Nominal.morphologyDefiniteness.markingN.DEF	Word.orderClitic.pronouns.participleOV	33	28	7	0.0802317
Verbal.morphologypresent.progressive..APROG.NO.A.AGR	Verbal.morphologysimple.PAST..OPST.NO.O.AGR	11	111	9	0.0802317
Nominal.morphologyPronominal.CasesOBL.Cases	Word.orderInfinitiveOV	65	77	39	0.0802317
Nominal.morphologyCase.markingCASE.ADJ	Nominal.morphologyPronominal.CasesOBL.Cases	68	65	33	0.0794395
Nominal.morphologyDefiniteness.markingN.DEF	Verbal.morphologypresent.progressive..DATPROG.NO.DAT.AGR	33	129	32	0.07937
Nominal.morphologyCase.markingCASE.ADJ	Nominal.morphologyPronominal.CasesA.O	68	123	62	0.0790489
TENSEFutureFUT.Particle	Word.orderMain.clausesSOV	16	67	8	0.0789871
Nominal.morphologyNominal.casesVOC	TENSEFutureFUT.Participle	60	18	8	0.0783318
Nominal.morphologyPronominal.CasesAGGL.CASE.NR	Verbal.morphologysimple.PAST..DATPST.NO.DAT.AGR	15	126	14	0.0783318
Nominal.morphologyPronominal.CasesDAT.O	Word.orderSubordinate.clauseV2	74	9	5	0.0779615
Nominal.morphologyPronominal.CasesDAT.O	Word.orderInfinitiveOV	74	77	44	0.0779615
Nominal.morphologyPronominal.CasesDAT.O	Verbal.morphologysimple.PAST..OPST.NO.O.AGR	74	111	60	0.0779615
ALIGNMENTNoun..Simple.PastN.PST.A.O.	Word.orderMain.clausesV2	40	34	10	0.0777777
ALIGNMENTNoun..Present.ProgressiveN.PROG.A.O.	Word.orderMain.clausesV2	44	34	11	0.0777777
Word.orderClitic.pronouns.infinitiveOV	Word.orderWH.elementWH.initial	21	92	15	0.0770877
Word.orderAdpositionsPrep	Word.orderClitic.pronouns.participle2nd.position	100	12	9	0.076961
ALIGNMENTVerb..Simple.PastV.PST.A.O.	TENSEFutureFUT.AUX	16	63	8	0.0769193
ALIGNMENTPronoun..Simple.PastP.PST.A.Sa.	Word.orderNoun.adjectiveNA	131	45	43	0.0765526
Nominal.morphologyCase.markingCASE.N	Verbal.morphologysimple.PAST..OPST.O.AGR.FULL	107	14	11	0.0764417
Word.orderNoun.adjectiveAN	Word.orderSubordinate.clauseSOV	112	81	68	0.076373
Nominal.morphologyNominal.casesVOC	Word.orderNoun.adjectiveAN	60	112	49	0.0761891
ALIGNMENTNoun..Simple.PastN.PST.A.Sa.	Nominal.morphologyDefiniteness.markingN.DEF	128	33	31	0.075882
Word.orderClitic.pronouns.infinitiveOV	Word.orderSubordinate.clauseSOV	21	81	13	0.0753125
ALIGNMENTNoun..Simple.PastN.PST.A.Sa.	Word.orderClitic.pronouns.participleVO	128	24	23	0.0752234
Nominal.morphologyNominal.casesVOC	Word.orderMain.clausesSVO	60	50	22	0.0751075
Nominal.morphologyGender...Noun.classM.F	TENSEFutureFUT.Synth	101	68	50	0.0746071
ALIGNMENTVerb..Simple.PastV.PST.A.Sa.	TENSEFuturePERF.FUT	125	14	13	0.0744052
Nominal.morphologyCase.markingCASE.N	Word.orderParticipleOV	107	75	64	0.0738409
ALIGNMENTCompare.PROG.PASTPAST_A.PROG_O	Word.orderAdpositionsPrep	11	100	8	0.0735884
ALIGNMENTNoun..Simple.PastN.PST.A.Sa.	Word.orderClitic.pronouns.infinitiveVO	128	20	19	0.0734102
Nominal.morphologyNominal.casesOBL.Cases	Verbal.morphologypresent.progressive..APROG.A.AGR.FULL	75	82	45	0.0728877
Nominal.morphologyPronominal.CasesA.O	Word.orderMain.clausesSVO	123	50	45	0.0728877
Word.orderSubordinate.clauseSVO	Word.orderSubordinate.clauseVSO	57	16	7	0.0726845
Nominal.morphologyDefiniteness.markingADJ.DEF	Word.orderSubordinate.clauseSVO	35	57	15	0.0726845
Nominal.morphologyDefiniteness.markingN.DEF	Verbal.morphologysimple.PAST..APST.NO.A.AGR	33	29	7	0.0725393
Nominal.morphologyNominal.casesDAT	Word.orderNoun.PossessorPoss.N	85	93	59	0.0721
Word.orderAdpositionsPost	Word.orderClitic.pronouns.finite.verb2nd.position	57	12	5	0.0719126
Nominal.morphologyPronominal.CasesA.O	Word.orderNoun.adjectiveAN	123	112	100	0.0716992
Nominal.morphologyCase.markingCASE.ART	Nominal.morphologyPronominal.CasesA.O	45	123	41	0.071459
Nominal.morphologyNominal.casesO.case	Word.orderClitic.pronouns.finite.verb2nd.position	102	12	9	0.070998
Nominal.morphologyCase.markingCASE.ADJ	Nominal.morphologyNominal.cases.7.Cases	68	26	13	0.0709517
ALIGNMENTPronoun..Simple.PastP.PST.A.Sa.	Word.orderAdpositionsPrep	131	100	95	0.0707217
Nominal.morphologyPronominal.CasesA.O	Word.orderClitic.pronouns.participleVO	123	24	22	0.0706176
Nominal.morphologyPronominal.CasesAGGL.CASE.NR	Verbal.morphologypresent.progressive..OPROG.NO.O.AGR	15	127	14	0.0704267
Nominal.morphologyCase.markingCASE.ADJ	TENSEFutureFUT.AUX	68	63	34	0.0700934
ALIGNMENTPronoun..Simple.PastP.PST.A.Sa.	Word.orderWH.elementWH.initial	131	92	91	0.0697007
ALIGNMENTNoun..Simple.PastN.PST.A.Sa.	Word.orderClitic.pronouns.finite.verbOV	128	30	28	0.0694095
ALIGNMENTVerb..Simple.PastV.PST..O.So.	Word.orderClitic.pronouns.infinitiveOV	32	21	5	0.0691336
Nominal.morphologyNominal.casesDAT	Verbal.morphologysimple.PAST..OPST.O.Gender.AGR	85	13	8	0.0690532
ALIGNMENTNoun..Present.ProgressiveN.PROG..O.So.	Verbal.morphologysimple.PAST..OPST.O.AGR.FULL	49	14	5	0.0689929
Nominal.morphologyNominal.casesGEN	Verbal.morphologysimple.PAST..OPST.O.AGR.FULL	98	14	10	0.0689929
Word.orderClitic.pronouns.participle2nd.position	Word.orderNoun.adjectiveAN	12	112	10	0.0689929
Word.orderInfinitiveOV	Word.orderNoun.adjectiveAN	77	112	66	0.0689929
ALIGNMENTPronoun..Simple.PastP.PST.A.O.	Nominal.morphologyPronominal.CasesOBL.Cases	19	65	9	0.0688309
ALIGNMENTReflexive.Pronoun.in.trans..ClauseREFL.ref.O	Nominal.morphologyNominal.casesO.case	5	102	5	0.0687279
ALIGNMENTPronoun..Simple.PastP.PST.A.Sa.	Nominal.morphologyNominal.casesGEN.DAT	131	77	73	0.068669
Verbal.morphologysimple.PAST..OPST.NO.O.AGR	Word.orderInfinitiveVO	111	53	45	0.0684828
ALIGNMENTVerb..Present.ProgressiveV.PROG..O.So.	Nominal.morphologyGender.agreementPRED.ADJ	13	73	8	0.0682198
Nominal.morphologyDefiniteness.markingDEF.LAST	Word.orderWH.elementWH.V	9	68	5	0.067903
Word.orderNoun.relative.clauseNRel	Word.orderWH.elementWH.initial	110	92	83	0.0678413
Nominal.morphologyDefiniteness.markingDEF.ART	TENSEFutureFUT.AUX	61	63	30	0.0671697
Nominal.morphologyGender...Noun.classM.F	Word.orderClitic.pronouns.participleOV	101	28	21	0.0670107
ALIGNMENTNoun..Simple.PastN.PST.A.Sa.	Word.orderClitic.pronouns.finite.verbVO	128	29	27	0.0669434
Nominal.morphologyDefiniteness.markingN.DEF	Word.orderAdpositionsPrep	33	100	24	0.0668087
ALIGNMENTPronoun..Simple.PastP.PST.A.Sa.	Word.orderInfinitiveVO	131	53	53	0.0664451
ALIGNMENTNoun..Present.ProgressiveN.PROG.A.O.	Word.orderNoun.relative.clauseNRel	44	110	38	0.065571
Word.orderAdpositionsPost	Word.orderClitic.pronouns.infinitive2nd.position	57	12	5	0.0650866
ALIGNMENTVerb..Simple.PastV.PST.A.Sa.	Word.orderWH.elementWH.initial	125	92	87	0.0648532
ALIGNMENTNoun..Simple.PastN.PST..O.So.	Word.orderWH.elementWH.V	65	68	36	0.0648213
Nominal.morphologyCase.markingCASE.LAST	Nominal.morphologyNominal.casesGEN.DAT	34	77	19	0.0647056
Nominal.morphologyNominal.casesGEN.DAT	Word.orderMain.clausesV2	77	34	19	0.0647056
Nominal.morphologyCase.markingCASE.ART	Word.orderClitic.pronouns.finite.verbOV	45	30	10	0.0646793
ALIGNMENTPronoun..Simple.PastP.PST..O.So.	Word.orderNoun.adjectiveNA	37	45	12	0.0645385
Nominal.morphologyPronominal.Cases.7.Cases	Word.orderNoun.adjectiveAN	11	112	9	0.0644371
Nominal.morphologyNominal.casesO.case	Word.orderClitic.pronouns.infinitive2nd.position	102	12	9	0.064172
Verbal.morphologysimple.PAST..APST.A.Gender.AGR	Word.orderWH.elementWH.initial	10	92	7	0.0637579
ALIGNMENTVerb..Simple.PastV.PST.A.Sa.	Nominal.morphologyPronominal.CasesDAT.O	125	74	67	0.0627464
Nominal.morphologyNominal.casesGEN.DAT	Word.orderSubordinate.clauseSOV	77	81	46	0.0602001
ALIGNMENTVerb..Simple.PastV.PST.A.Sa.	Verbal.morphologypresent.progressive..APROG.NO.A.AGR	125	11	10	0.060029
ALIGNMENTVerb..Simple.PastV.PST..O.So.	TENSEContinous.presentProgressive.present	32	20	9	0.0597101
ALIGNMENTPronoun..Simple.PastP.PST.A.Sa.	Word.orderNoun.PossessorN.Poss	131	58	56	0.0595247
Word.orderClitic.pronouns.finite.verbVO	Word.orderNoun.PossessorPoss.N	29	93	20	0.0588706
ALIGNMENTNoun..Present.ProgressiveN.PROG.A.O.	Verbal.morphologysimple.PAST..OPST.NO.O.AGR	44	111	35	0.0588405
Nominal.morphologyNominal.casesVOC	Word.orderInfinitiveOV	60	77	35	0.0588405
ALIGNMENTVerb..Simple.PastV.PST..O.So.	Nominal.morphologyNominal.cases.7.Cases	32	26	6	0.0583596
Nominal.morphologyCase.markingCASE.ADJ	Nominal.morphologyNominal.casesOBL.Cases	68	75	37	0.0575287
TENSEFutureFUT.Particle	Word.orderNoun.adjectiveAN	16	112	13	0.0574684
Word.orderClitic.pronouns.infinitiveVO	Word.orderMain.clausesV2	20	34	5	0.0572992
TENSEFutureFUT.Synth	Word.orderSubordinate.clauseVSO	68	16	8	0.0571584
ALIGNMENTNoun..Present.ProgressiveN.PROG..O.So.	Nominal.morphologyCase.markingCASE.LAST	49	34	12	0.0571584
Nominal.morphologyNominal.casesDAT	Word.orderMain.clausesSOV	85	67	41	0.0566608
Nominal.morphologyNominal.casesVOC	Word.orderNoun.PossessorPoss.N	60	93	41	0.0564413
TENSEFutureFUT.AUX	Verbal.morphologysimple.PAST..OPST.NO.O.AGR	63	111	54	0.0563
Nominal.morphologyNominal.casesGEN	Word.orderInfinitiveOV	98	77	57	0.0559208
ALIGNMENTCompare.PROG.PASTPAST_A.PROG_O	ALIGNMENTNoun..Simple.PastN.PST.Sa.So.	11	140	11	0.0555699
ALIGNMENTNoun..Simple.PastN.PST.Sa.So.	Nominal.morphologyPronominal.CasesAGGL.CASE.NR	140	15	15	0.0555699
ALIGNMENTNoun..Simple.PastN.PST.A.O.	ALIGNMENTNoun..Simple.PastN.PST.Sa.So.	40	140	40	0.0555699
ALIGNMENTNoun..Simple.PastN.PST.Sa.So.	Nominal.morphologyGender...Noun.classNEUTR	140	56	56	0.0555699
ALIGNMENTNoun..Simple.PastN.PST.Sa.So.	Nominal.morphologyDefiniteness.markingDEF.ART	140	61	61	0.0555699
ALIGNMENTNoun..Simple.PastN.PST.Sa.So.	Word.orderAdpositionsPrep	140	100	100	0.0555699
ALIGNMENTNoun..Simple.PastN.PST..O.So.	Word.orderInfinitiveVO	65	53	26	0.0550598
ALIGNMENTVerb..Simple.PastV.PST.A.Sa.	Verbal.morphologysimple.PAST..APST.A.AGR.FULL	125	59	53	0.0548733
Nominal.morphologyNominal.casesGEN.DAT	Verbal.morphologysimple.PAST..OPST.NO.O.AGR	77	111	61	0.0547505
ALIGNMENTPronoun..Present.ProgressiveP.PROG.A.O.	Word.orderNoun.PossessorPoss.N	22	93	15	0.0542216
ALIGNMENTNoun..Simple.PastN.PST.A.Sa.	Word.orderParticipleVO	128	59	59	0.0532445
ALIGNMENTVerb..Simple.PastV.PST.A.Sa.	Word.orderParticipleVO	125	59	58	0.0530869
Nominal.morphologyNominal.casesGEN.DAT	Word.orderMain.clausesSOV	77	67	37	0.0528525
ALIGNMENTVerb..Simple.PastV.PST.A.O.	Word.orderWH.elementWH.initial	16	92	11	0.0525653
ALIGNMENTNoun..Simple.PastN.PST.A.Sa.	Word.orderNoun.adjectiveNA	128	45	41	0.0520916
Word.orderClitic.pronouns.participleOV	Word.orderSubordinate.clauseSVO	28	57	12	0.0520652
ALIGNMENTPronoun..Simple.PastP.PST.A.Sa.	Word.orderClitic.pronouns.participleVO	131	24	23	0.0520564
ALIGNMENTCompare.PROG.PASTPAST_A.PROG_O	Verbal.morphologysimple.PAST..DATPST.NO.DAT.AGR	11	126	10	0.0520145
ALIGNMENTNoun..Simple.PastN.PST.A.Sa.	Nominal.morphologyGender...Noun.classNEUTR	128	56	51	0.051656
ALIGNMENTNoun..Present.ProgressiveN.PROG.A.O.	ALIGNMENTPronoun..Simple.PastP.PST.A.Sa.	44	131	41	0.0513974
ALIGNMENTNoun..Simple.PastN.PST.A.Sa.	Word.orderClitic.pronouns.finite.verb2nd.position	128	12	11	0.0513909
Word.orderAdpositionsPost	Word.orderClitic.pronouns.participle2nd.position	57	12	5	0.0512933
Nominal.morphologyPronominal.CasesDAT.O	Word.orderAdpositionsPost	74	57	30	0.0512933
Nominal.morphologyPronominal.CasesA.O	Word.orderInfinitiveVO	123	53	49	0.0509865
ALIGNMENTPronoun..Simple.PastP.PST.A.O.	ALIGNMENTVerb..Simple.PastV.PST.A.Sa.	19	125	17	0.0508932
Nominal.morphologyNominal.casesGEN	Word.orderSubordinate.clauseSOV	98	81	58	0.0508397
ALIGNMENTPronoun..Simple.PastP.PST.A.Sa.	ALIGNMENTVerb..Simple.PastV.PST.A.O.	131	16	15	0.0506967
Nominal.morphologyNominal.casesVOC	TENSEFutureFUT.Synth	60	68	29	0.0506558
Word.orderClitic.pronouns.participleVO	Word.orderMain.clausesV2	24	34	6	0.0503787
Nominal.morphologyNominal.casesO.case	Word.orderClitic.pronouns.participle2nd.position	102	12	9	0.0503787
ALIGNMENTPronoun..Simple.PastP.PST.A.Sa.	Word.orderClitic.pronouns.infinitiveVO	131	20	19	0.0502431
ALIGNMENTVerb..Simple.PastV.PST.A.Sa.	Nominal.morphologyNominal.casesDAT	125	85	76	0.0502009
Verbal.morphologysimple.PAST..OPST.NO.O.AGR	Word.orderNoun.PossessorN.Poss	111	58	47	0.0499877
ALIGNMENTVerb..Simple.PastV.PST.A.Sa.	Word.orderClitic.pronouns.finite.verbOV	125	30	27	0.0499786
ALIGNMENTNoun..Present.ProgressiveN.PROG.A.O.	ALIGNMENTNoun..Simple.PastN.PST.A.Sa.	44	128	40	0.0498718
ALIGNMENTNoun..Simple.PastN.PST.A.Sa.	Nominal.morphologyNominal.casesGEN.DAT	128	77	70	0.0498718
ALIGNMENTCompare.PROG.PASTPAST_A.PROG_O	Word.orderWH.elementWH.V	11	68	6	0.0495538
TENSEFutureFUT.Synth	Verbal.morphologysimple.PAST..APST.NO.A.AGR	68	29	14	0.0494661
Nominal.morphologyCase.markingCASE.ADJ	Verbal.morphologypresent.progressive..OPROG.NO.O.AGR	68	127	63	0.0494409
Nominal.morphologyGender.agreementPRED.ADJ	Word.orderNoun.PossessorN.Poss	73	58	36	0.0494046
TENSEFutureFUT.Particle	Word.orderNoun.PossessorPoss.N	16	93	11	0.0489147
ALIGNMENTNoun..Simple.PastN.PST.A.Sa.	Nominal.morphologyNominal.casesGEN	128	98	89	0.0488509
ALIGNMENTNoun..Simple.PastN.PST.Sa.So.	Verbal.morphologypresent.progressive..APROG.A.Gender.AGR	140	5	5	0.0487902
Nominal.morphologyNominal.casesVOC	Verbal.morphologysimple.PAST..OPST.O.AGR.FULL	60	14	6	0.0487902
ALIGNMENTNoun..Simple.PastN.PST.Sa.So.	Word.orderClitic.pronouns.finite.verb2nd.position	140	12	12	0.0487902
ALIGNMENTNoun..Simple.PastN.PST.Sa.So.	Nominal.morphologyDefiniteness.markingN.DEF	140	33	33	0.0487902
ALIGNMENTNoun..Simple.PastN.PST.Sa.So.	Nominal.morphologyDefiniteness.markingADJ.DEF	140	35	35	0.0487902
Nominal.morphologyNominal.casesVOC	Word.orderParticipleOV	60	75	35	0.0487902
TENSEFuturePERF.FUT	Word.orderNoun.PossessorN.Poss	14	58	6	0.0484668
Nominal.morphologyPronominal.CasesAGGL.CASE	Verbal.morphologysimple.PAST..DATPST.NO.DAT.AGR	34	126	31	0.0481717
Nominal.morphologyPronominal.CasesDAT.O	Verbal.morphologysimple.PAST..DATPST.NO.DAT.AGR	74	126	67	0.0479522
Nominal.morphologyPronominal.CasesAGGL.CASE.NR	Verbal.morphologypresent.progressive..DATPROG.NO.DAT.AGR	15	129	14	0.0479285
ALIGNMENTPronoun..Simple.PastP.PST.A.Sa.	Nominal.morphologyGender...Noun.classNEUTR	131	56	52	0.047907
ALIGNMENTPronoun..Simple.PastP.PST.A.Sa.	Nominal.morphologyNominal.casesGEN	131	98	91	0.047907
Verbal.morphologysimple.PAST..APST.NO.A.AGR	Word.orderClitic.pronouns.finite.verbVO	29	29	6	0.0476004
Nominal.morphologyGender...Noun.classM.F	Nominal.morphologyPronominal.CasesA.O	101	123	88	0.0472442
Nominal.morphologyDefiniteness.markingN.DEF	Nominal.morphologyNominal.casesDAT	33	85	20	0.047006
Nominal.morphologyDefiniteness.markingN.DEF	TENSEFutureFUT.Synth	33	68	16	0.047006
Nominal.morphologyNominal.casesDAT	Word.orderInfinitiveOV	85	77	49	0.047006
Nominal.morphologyCase.markingCASE.LAST	Verbal.morphologypresent.progressive..APROG.A.AGR.FULL	34	82	20	0.0463054
TENSEFutureFUT.Particle	Word.orderWH.elementWH.initial	16	92	11	0.0457394
ALIGNMENTNoun..Simple.PastN.PST.Sa.So.	Nominal.morphologyGender...Noun.classM.F	140	101	100	0.0456195
Verbal.morphologysimple.PAST..APST.A.AGR.FULL	Word.orderMain.clausesSVO	59	50	21	0.0453946
Verbal.morphologypresent.progressive..APROG.NO.A.AGR	Verbal.morphologysimple.PAST..DATPST.NO.DAT.AGR	11	126	10	0.0452348
Nominal.morphologyPronominal.CasesDAT.O	Word.orderNoun.PossessorPoss.N	74	93	50	0.0451717
Nominal.morphologyDefiniteness.markingN.DEF	Word.orderNoun.PossessorN.Poss	33	58	14	0.0451404
Verbal.morphologypresent.progressive..OPROG.NO.O.AGR	Word.orderAdpositionsPrep	127	100	91	0.0451089
Verbal.morphologysimple.PAST..APST.A.AGR.FULL	Word.orderClitic.pronouns.participleOV	59	28	12	0.044978
ALIGNMENTPronoun..Present.ProgressiveP.PROG..O.So.	Verbal.morphologypresent.progressive..APROG.A.AGR.FULL	24	82	14	0.0447168
ALIGNMENTNoun..Simple.PastN.PST.A.Sa.	Word.orderClitic.pronouns.infinitive2nd.position	128	12	11	0.044565
Nominal.morphologyDefiniteness.markingDEF.FIRST	Nominal.morphologyGender.agreementPRED.ADJ	34	73	21	0.0444906
Nominal.morphologyDefiniteness.markingN.DEF	Nominal.morphologyNominal.casesGEN	33	98	23	0.0444518
TENSEFuturePERF.FUT	Word.orderNoun.relative.clauseNRel	14	110	12	0.0444182
ALIGNMENTCompare.PROG.PASTPAST_A.PROG_O	Verbal.morphologypresent.progressive..OPROG.NO.O.AGR	11	127	10	0.0441094
Nominal.morphologyCase.markingCASE.ART	Word.orderClitic.pronouns.participleVO	45	24	8	0.04406
ALIGNMENTCompare.PROG.PASTPROG_A.PST_O	Nominal.morphologyNominal.casesDAT	30	85	18	0.0437354
Nominal.morphologyCase.markingCASE.ADJ	Word.orderNoun.PossessorN.Poss	68	58	29	0.0435528
ALIGNMENTVerb..Simple.PastV.PST.A.Sa.	Verbal.morphologysimple.PAST..DATPST.DAT.AGR.FULL	125	10	9	0.0431527
ALIGNMENTVerb..Simple.PastV.PST.A.Sa.	Nominal.morphologyNominal.casesGEN	125	98	87	0.0430595
Nominal.morphologyGender...Noun.classNEUTR	Verbal.morphologypresent.progressive..DATPROG.NO.DAT.AGR	56	129	52	0.0428134
Nominal.morphologyPronominal.CasesAGGL.CASE	Verbal.morphologysimple.PAST..APST.NO.A.AGR	34	29	7	0.0426864
ALIGNMENTPronoun..Simple.PastP.PST.A.Sa.	ALIGNMENTVerb..Present.ProgressiveV.PROG..O.So.	131	13	12	0.0419722
ALIGNMENTPronoun..Simple.PastP.PST.A.Sa.	Nominal.morphologyNominal.cases.7.Cases	131	26	24	0.0419722
ALIGNMENTNoun..Simple.PastN.PST.Sa.So.	Word.orderClitic.pronouns.infinitive2nd.position	140	12	12	0.0419642
ALIGNMENTNoun..Simple.PastN.PST.Sa.So.	Verbal.morphologysimple.PAST..APST.A.Gender.AGR	140	10	10	0.0419642
ALIGNMENTNoun..Simple.PastN.PST.Sa.So.	TENSEFutureFUT.Particle	140	16	16	0.0419642
Verbal.morphologysimple.PAST..DATPST.NO.DAT.AGR	Word.orderAdpositionsPrep	126	100	90	0.0419642
Nominal.morphologyNominal.casesAGGL.CASE	Nominal.morphologyPronominal.CasesA.O	45	123	39	0.0419271
Word.orderClitic.pronouns.participleOV	Word.orderClitic.pronouns.participleVO	28	24	5	0.0415939
ALIGNMENTNoun..Present.ProgressiveN.PROG.A.O.	ALIGNMENTVerb..Simple.PastV.PST.A.Sa.	44	125	39	0.0414909
ALIGNMENTVerb..Present.ProgressiveV.PROG.A.Sa.	Nominal.morphologyDefiniteness.markingDEF.LAST	142	9	9	0.0413852
ALIGNMENTCompare.PROG.PASTPAST_A.PROG_O	ALIGNMENTVerb..Present.ProgressiveV.PROG.A.Sa.	11	142	11	0.0413852
ALIGNMENTCompare.PROG.PASTPROG_A.PST_O	ALIGNMENTVerb..Present.ProgressiveV.PROG.A.Sa.	30	142	30	0.0413852
ALIGNMENTNoun..Present.ProgressiveN.PROG.A.O.	ALIGNMENTVerb..Present.ProgressiveV.PROG.A.Sa.	44	142	44	0.0413852
ALIGNMENTVerb..Present.ProgressiveV.PROG.A.Sa.	Word.orderAdpositionsPrep	142	100	100	0.0413852
ALIGNMENTVerb..Present.ProgressiveV.PROG.A.Sa.	Verbal.morphologysimple.PAST..APST.NO.A.AGR	142	29	29	0.0413852
ALIGNMENTNoun..Simple.PastN.PST.A.O.	ALIGNMENTVerb..Present.ProgressiveV.PROG.A.Sa.	40	142	40	0.0413852
ALIGNMENTVerb..Present.ProgressiveV.PROG.A.Sa.	Nominal.morphologyDefiniteness.markingDEF.ART	142	61	61	0.0413852
Nominal.morphologyCase.markingCASE.ADJ	Verbal.morphologysimple.PAST..DATPST.NO.DAT.AGR	68	126	62	0.0413457
Verbal.morphologysimple.PAST..APST.NO.A.AGR	Word.orderSubordinate.clauseSOV	29	81	17	0.0412817
Nominal.morphologyPreposition.agreementPRON.AGR	Word.orderAdpositionsPrep	15	100	11	0.0405019
Nominal.morphologyNominal.casesGEN.DAT	Verbal.morphologypresent.progressive..APROG.NO.A.AGR	77	11	6	0.0404914
Nominal.morphologyDefiniteness.markingN.DEF	Nominal.morphologyNominal.casesGEN.DAT	33	77	18	0.0404914
TENSEContinous.presentProgressive.present	TENSEFutureFUT.Participle	20	18	5	0.0404616
Nominal.morphologyPronominal.CasesOBL.Cases	Verbal.morphologypresent.progressive..APROG.A.AGR.FULL	65	82	38	0.0401325
Nominal.morphologyPronominal.CasesA.O	Verbal.morphologysimple.PAST..OPST.NO.O.AGR	123	111	96	0.0398459
Verbal.morphologypresent.progressive..APROG.A.AGR.FULL	Word.orderSubordinate.clauseSVO	82	57	34	0.0396236
ALIGNMENTNoun..Simple.PastN.PST..O.So.	Word.orderMain.clausesSVO	65	50	23	0.0395165
ALIGNMENTCompare.PROG.PASTPAST_A.PROG_O	Word.orderParticipleVO	11	59	5	0.03928
ALIGNMENTPronoun..Simple.PastP.PST.A.Sa.	Verbal.morphologypresent.progressive..APROG.A.AGR.FULL	131	82	76	0.0392494
ALIGNMENTNoun..Simple.PastN.PST.A.Sa.	Nominal.morphologyCase.markingCASE.ADJ	128	68	62	0.039203
ALIGNMENTPronoun..Simple.PastP.PST..O.So.	Nominal.morphologyNominal.casesGEN.DAT	37	77	20	0.0382212
Nominal.morphologyPronominal.CasesA.O	TENSEFutureFUT.Particle	123	16	14	0.0378909
ALIGNMENTPronoun..Simple.PastP.PST.A.O.	Nominal.morphologyNominal.casesVOC	19	60	8	0.0378703
Nominal.morphologyNominal.casesVOC	Word.orderAdpositionsPost	60	57	24	0.0378703
ALIGNMENTReflexive.Pronoun.in.trans..ClauseREFL.ref.A	Verbal.morphologypresent.progressive..OPROG.O.AGR.FULL	114	7	7	0.0376876
ALIGNMENTReflexive.Pronoun.in.trans..ClauseREFL.ref.A	Verbal.morphologypresent.progressive..DATPROG.DAT.AGR.FULL	114	9	9	0.0376876
ALIGNMENTReflexive.Pronoun.in.trans..ClauseREFL.ref.A	Verbal.morphologysimple.PAST..APST.A.Gender.AGR	114	10	10	0.0376876
ALIGNMENTReflexive.Pronoun.in.trans..ClauseREFL.ref.A	Verbal.morphologysimple.PAST..DATPST.DAT.AGR.FULL	114	10	10	0.0376876
ALIGNMENTReflexive.Pronoun.in.trans..ClauseREFL.ref.A	TENSEFuturePERF.FUT	114	14	14	0.0376876
ALIGNMENTReflexive.Pronoun.in.trans..ClauseREFL.ref.A	Nominal.morphologyPronominal.Cases.7.Cases	114	11	11	0.0376876
ALIGNMENTPronoun..Simple.PastP.PST.A.Sa.	Nominal.morphologyPronominal.CasesDAT.O	131	74	68	0.0374576
ALIGNMENTNoun..Simple.PastN.PST.Sa.So.	Verbal.morphologysimple.PAST..OPST.NO.O.AGR	140	111	109	0.0373875
Nominal.morphologyPronominal.CasesDAT.O	Word.orderMain.clausesSOV	74	67	35	0.0370229
Nominal.morphologyCase.markingCASE.ART	Verbal.morphologysimple.PAST..APST.A.AGR.FULL	45	59	19	0.0369728
Nominal.morphologyPreposition.agreementPRON.AGR	Verbal.morphologysimple.PAST..DATPST.NO.DAT.AGR	15	126	14	0.0369466
Verbal.morphologypresent.progressive..DATPROG.NO.DAT.AGR	Verbal.morphologysimple.PAST..OPST.O.Gender.AGR	129	13	12	0.0368786
ALIGNMENTNoun..Present.ProgressiveN.PROG..O.So.	ALIGNMENTPronoun..Simple.PastP.PST.A.Sa.	49	131	45	0.0368571
Nominal.morphologyPronominal.CasesA.O	Verbal.morphologypresent.progressive..OPROG.NO.O.AGR	123	127	111	0.0367654
Nominal.morphologyCase.markingCASE.N	TENSEFutureFUT.Synth	107	68	51	0.0367014
Verbal.morphologysimple.PAST..OPST.O.Gender.AGR	Word.orderWH.elementWH.V	13	68	7	0.0366504
ALIGNMENTPronoun..Simple.PastP.PST.A.Sa.	Nominal.morphologyNominal.casesDAT	131	85	78	0.0360725
Nominal.morphologyDefiniteness.markingDEF.ART	Verbal.morphologypresent.progressive..OPROG.NO.O.AGR	61	127	55	0.0358789
ALIGNMENTNoun..Simple.PastN.PST.A.Sa.	Verbal.morphologypresent.progressive..APROG.A.AGR.FULL	128	82	74	0.0357482
ALIGNMENTNoun..Simple.PastN.PST.A.Sa.	TENSEFutureFUT.AUX	128	63	61	0.0356898
ALIGNMENTNoun..Simple.PastN.PST.Sa.So.	Word.orderClitic.pronouns.infinitiveVO	140	20	20	0.0350913
ALIGNMENTNoun..Simple.PastN.PST.Sa.So.	Word.orderClitic.pronouns.infinitiveOV	140	21	21	0.0350913
ALIGNMENTNoun..Simple.PastN.PST.Sa.So.	Nominal.morphologyCase.markingCASE.ART	140	45	45	0.0350913
ALIGNMENTNoun..Simple.PastN.PST.A.Sa.	Nominal.morphologyPreposition.agreementPRON.AGR	128	15	14	0.0348039
ALIGNMENTVerb..Present.ProgressiveV.PROG.A.Sa.	Word.orderClitic.pronouns.finite.verb2nd.position	142	12	12	0.0346055
ALIGNMENTVerb..Present.ProgressiveV.PROG.A.Sa.	Word.orderMain.clausesVSO	142	12	12	0.0346055
ALIGNMENTVerb..Present.ProgressiveV.PROG.A.Sa.	ALIGNMENTVerb..Simple.PastV.PST.A.O.	142	16	16	0.0346055
ALIGNMENTVerb..Present.ProgressiveV.PROG.A.Sa.	Word.orderMain.clausesV2	142	34	34	0.0346055
ALIGNMENTVerb..Present.ProgressiveV.PROG.A.Sa.	Nominal.morphologyDefiniteness.markingADJ.DEF	142	35	35	0.0346055
ALIGNMENTVerb..Present.ProgressiveV.PROG.A.Sa.	Verbal.morphologypresent.progressive..APROG.A.Gender.AGR	142	5	5	0.0346055
ALIGNMENTVerb..Present.ProgressiveV.PROG.A.Sa.	Nominal.morphologyDefiniteness.markingN.DEF	142	33	33	0.0346055
ALIGNMENTVerb..Present.ProgressiveV.PROG.A.Sa.	Word.orderMain.clausesSVO	142	50	50	0.0346055
ALIGNMENTNoun..Present.ProgressiveN.PROG.A.Sa.	ALIGNMENTVerb..Present.ProgressiveV.PROG.A.O.	143	9	9	0.0343676
ALIGNMENTNoun..Present.ProgressiveN.PROG.A.Sa.	Nominal.morphologyDefiniteness.markingDEF.LAST	143	9	9	0.0343676
ALIGNMENTCompare.PROG.PASTPAST_A.PROG_O	ALIGNMENTNoun..Present.ProgressiveN.PROG.A.Sa.	11	143	11	0.0343676
ALIGNMENTCompare.PROG.PASTPROG_A.PST_O	ALIGNMENTNoun..Present.ProgressiveN.PROG.A.Sa.	30	143	30	0.0343676
ALIGNMENTNoun..Present.ProgressiveN.PROG.A.Sa.	ALIGNMENTNoun..Simple.PastN.PST.A.O.	143	40	40	0.0343676
ALIGNMENTNoun..Present.ProgressiveN.PROG.A.O.	ALIGNMENTNoun..Present.ProgressiveN.PROG.A.Sa.	44	143	44	0.0343676
ALIGNMENTNoun..Present.ProgressiveN.PROG.A.Sa.	Nominal.morphologyDefiniteness.markingDEF.ART	143	61	61	0.0343676
ALIGNMENTNoun..Present.ProgressiveN.PROG.A.Sa.	Word.orderAdpositionsPrep	143	100	100	0.0343676
ALIGNMENTNoun..Present.ProgressiveN.PROG.A.Sa.	ALIGNMENTNoun..Simple.PastN.PST.A.Sa.	143	128	128	0.0343676
Nominal.morphologyDefiniteness.markingDEF.ART	TENSEFutureFUT.Synth	61	68	29	0.0341265
ALIGNMENTNoun..Simple.PastN.PST.A.O.	Verbal.morphologypresent.progressive..OPROG.NO.O.AGR	40	127	36	0.034059
Nominal.morphologyGender...Noun.classNEUTR	Verbal.morphologysimple.PAST..DATPST.NO.DAT.AGR	56	126	50	0.033996
ALIGNMENTNoun..Simple.PastN.PST.A.Sa.	ALIGNMENTPronoun..Simple.PastP.PST.A.O.	128	19	17	0.0339564
ALIGNMENTNoun..Present.ProgressiveN.PROG..O.So.	Word.orderClitic.pronouns.finite.verbVO	49	29	10	0.0339016
Nominal.morphologyGender...Noun.classM.F	Nominal.morphologyNominal.casesDAT	101	85	60	0.0337851
Nominal.morphologyNominal.casesGEN	Verbal.morphologysimple.PAST..OPST.NO.O.AGR	98	111	76	0.0334479
ALIGNMENTNoun..Simple.PastN.PST.Sa.So.	Word.orderNoun.adjectiveNA	140	45	44	0.033097
Nominal.morphologyDefiniteness.markingN.DEF	Word.orderInfinitiveVO	33	53	13	0.0330126
ALIGNMENTNoun..Present.ProgressiveN.PROG.A.O.	ALIGNMENTNoun..Simple.PastN.PST.Sa.So.	44	140	43	0.0325803
Verbal.morphologysimple.PAST..OPST.NO.O.AGR	Word.orderMain.clausesSVO	111	50	39	0.032441
Nominal.morphologyPronominal.CasesDAT.O	Verbal.morphologypresent.progressive..DATPROG.NO.DAT.AGR	74	129	68	0.032364
Nominal.morphologyDefiniteness.markingDEF.LAST	Word.orderNoun.PossessorPoss.N	9	93	6	0.0317487
ALIGNMENTNoun..Simple.PastN.PST.A.Sa.	Word.orderClitic.pronouns.participle2nd.position	128	12	11	0.0307717
ALIGNMENTNoun..Simple.PastN.PST.A.Sa.	Nominal.morphologyPronominal.CasesDAT.O	128	74	66	0.0307717
ALIGNMENTVerb..Simple.PastV.PST.A.Sa.	Verbal.morphologypresent.progressive..DATPROG.DAT.AGR.FULL	125	9	8	0.0307302
ALIGNMENTPronoun..Simple.PastP.PST.A.Sa.	Word.orderParticipleVO	131	59	59	0.0300775
Nominal.morphologyCase.markingCASE.ART	Nominal.morphologyPreposition.agreementPRON.AGR	45	15	5	0.0300737
ALIGNMENTVerb..Present.ProgressiveV.PROG.A.Sa.	Nominal.morphologyNominal.casesDAT	142	85	84	0.0295508
Nominal.morphologyGender...Noun.classM.F	Nominal.morphologyPronominal.CasesDAT.O	101	74	52	0.0292704
Nominal.morphologyPreposition.agreementPRON.AGR	Verbal.morphologypresent.progressive..OPROG.NO.O.AGR	15	127	14	0.0290414
ALIGNMENTVerb..Present.ProgressiveV.PROG.A.O.	Word.orderWH.elementWH.initial	9	92	6	0.0285734
ALIGNMENTPronoun..Simple.PastP.PST.A.Sa.	Word.orderClitic.pronouns.finite.verb2nd.position	131	12	11	0.0282239
ALIGNMENTNoun..Simple.PastN.PST.Sa.So.	Word.orderSubordinate.clauseV2	140	9	9	0.0281709
ALIGNMENTNoun..Simple.PastN.PST.Sa.So.	Word.orderClitic.pronouns.participle2nd.position	140	12	12	0.0281709
ALIGNMENTNoun..Simple.PastN.PST.Sa.So.	Nominal.morphologyDefiniteness.markingDEF.FIRST	140	34	34	0.0281709
Word.orderNoun.adjectiveAN	Word.orderParticipleOV	112	75	64	0.0281709
ALIGNMENTVerb..Present.ProgressiveV.PROG.A.Sa.	Verbal.morphologysimple.PAST..APST.A.Gender.AGR	142	10	10	0.0277796
ALIGNMENTVerb..Present.ProgressiveV.PROG.A.Sa.	Word.orderClitic.pronouns.infinitive2nd.position	142	12	12	0.0277796
ALIGNMENTVerb..Present.ProgressiveV.PROG.A.Sa.	TENSEFutureFUT.Particle	142	16	16	0.0277796
ALIGNMENTVerb..Present.ProgressiveV.PROG.A.Sa.	TENSEFuturePERF.FUT	142	14	14	0.0277796
ALIGNMENTVerb..Present.ProgressiveV.PROG.A.Sa.	Nominal.morphologyPronominal.CasesDAT.O	142	74	73	0.0277796
ALIGNMENTNoun..Present.ProgressiveN.PROG.A.Sa.	Word.orderClitic.pronouns.finite.verb2nd.position	143	12	12	0.027588
ALIGNMENTNoun..Present.ProgressiveN.PROG.A.Sa.	Word.orderMain.clausesVSO	143	12	12	0.027588
ALIGNMENTNoun..Present.ProgressiveN.PROG.A.Sa.	ALIGNMENTVerb..Simple.PastV.PST.A.O.	143	16	16	0.027588
ALIGNMENTNoun..Present.ProgressiveN.PROG.A.Sa.	Verbal.morphologypresent.progressive..APROG.A.Gender.AGR	143	5	5	0.027588
ALIGNMENTNoun..Simple.PastN.PST..O.So.	Nominal.morphologyGender...Noun.classANIM	65	11	5	0.027588
ALIGNMENTNoun..Present.ProgressiveN.PROG.A.Sa.	Word.orderClitic.pronouns.finite.verbVO	143	29	29	0.027588
ALIGNMENTNoun..Present.ProgressiveN.PROG.A.Sa.	Word.orderClitic.pronouns.finite.verbOV	143	30	30	0.027588
ALIGNMENTNoun..Present.ProgressiveN.PROG.A.Sa.	Word.orderMain.clausesV2	143	34	34	0.027588
ALIGNMENTNoun..Present.ProgressiveN.PROG.A.Sa.	Nominal.morphologyDefiniteness.markingADJ.DEF	143	35	35	0.027588
ALIGNMENTNoun..Present.ProgressiveN.PROG.A.Sa.	Word.orderMain.clausesSVO	143	50	50	0.027588
ALIGNMENTPronoun..Present.ProgressiveP.PROG..O.So.	Nominal.morphologyNominal.casesVOC	24	60	10	0.027399
ALIGNMENTNoun..Simple.PastN.PST.Sa.So.	Nominal.morphologyCase.markingCASE.ADJ	140	68	67	0.0271491
Nominal.morphologyCase.markingCASE.ADJ	Verbal.morphologypresent.progressive..DATPROG.NO.DAT.AGR	68	129	63	0.0269427
Verbal.morphologysimple.PAST..DATPST.NO.DAT.AGR	Word.orderClitic.pronouns.infinitiveOV	126	21	19	0.0267627
ALIGNMENTPronoun..Present.ProgressiveP.PROG.A.O.	ALIGNMENTPronoun..Simple.PastP.PST.A.Sa.	22	131	20	0.0267048
ALIGNMENTVerb..Present.ProgressiveV.PROG.A.Sa.	ALIGNMENTVerb..Simple.PastV.PST.A.Sa.	142	125	124	0.0265734
Nominal.morphologyPronominal.CasesA.O	Verbal.morphologysimple.PAST..DATPST.NO.DAT.AGR	123	126	109	0.0264882
ALIGNMENTNoun..Simple.PastN.PST.Sa.So.	Verbal.morphologypresent.progressive..OPROG.NO.O.AGR	140	127	125	0.0260908
Nominal.morphologyGender...Noun.classNEUTR	Verbal.morphologypresent.progressive..OPROG.NO.O.AGR	56	127	50	0.0260908
ALIGNMENTNoun..Simple.PastN.PST.Sa.So.	Verbal.morphologysimple.PAST..DATPST.NO.DAT.AGR	140	126	124	0.0259639
ALIGNMENTNoun..Simple.PastN.PST.Sa.So.	TENSEFutureFUT.Synth	140	68	66	0.0257169
Nominal.morphologyDefiniteness.markingDEF.FIRST	Verbal.morphologypresent.progressive..APROG.A.AGR.FULL	34	82	20	0.0256861
Nominal.morphologyDefiniteness.markingDEF.ART	Verbal.morphologysimple.PAST..DATPST.NO.DAT.AGR	61	126	54	0.0254349
ALIGNMENTNoun..Simple.PastN.PST.A.O.	Nominal.morphologyGender...Noun.classM.F	40	101	28	0.0254168
Nominal.morphologyGender...Noun.classM.F	Word.orderClitic.pronouns.infinitiveOV	101	21	15	0.025141
Nominal.morphologyPronominal.CasesA.O	TENSEFutureFUT.AUX	123	63	58	0.0251049
ALIGNMENTVerb..Simple.PastV.PST..O.So.	Word.orderNoun.adjectiveAN	32	112	25	0.0250736
Nominal.morphologyPronominal.CasesDAT.O	Verbal.morphologypresent.progressive..OPROG.NO.O.AGR	74	127	66	0.0250092
Nominal.morphologyNominal.casesGEN	TENSEFutureFUT.Particle	98	16	11	0.0239457
Verbal.morphologysimple.PAST..DATPST.NO.DAT.AGR	Word.orderNoun.adjectiveAN	126	112	99	0.0239457
ALIGNMENTReflexive.Pronoun.in.trans..ClauseREFL.ref.A	Word.orderSubordinate.clauseV2	114	9	9	0.0238943
Verbal.morphologysimple.PAST..OPST.NO.O.AGR	Word.orderSubordinate.clauseSVO	111	57	45	0.0238943
Verbal.morphologysimple.PAST..OPST.NO.O.AGR	Word.orderNoun.adjectiveAN	111	112	86	0.0235305
ALIGNMENTVerb..Present.ProgressiveV.PROG.A.Sa.	Nominal.morphologyGender...Noun.classNEUTR	142	56	55	0.0233667
Nominal.morphologyCase.markingCASE.ADJ	Word.orderMain.clausesSVO	68	50	24	0.0233501
ALIGNMENTVerb..Simple.PastV.PST.A.Sa.	Nominal.morphologyCase.markingCASE.ADJ	125	68	60	0.0233501
Nominal.morphologyPronominal.CasesA.O	Verbal.morphologypresent.progressive..DATPROG.NO.DAT.AGR	123	129	112	0.0232359
Nominal.morphologyCase.markingCASE.N	Nominal.morphologyPronominal.CasesA.O	107	123	91	0.0230586
Verbal.morphologypresent.progressive..DATPROG.NO.DAT.AGR	Word.orderAdpositionsPrep	129	100	91	0.0226107
Nominal.morphologyPronominal.CasesA.O	Word.orderAdpositionsPrep	123	100	85	0.022509
ALIGNMENTNoun..Simple.PastN.PST.Sa.So.	Nominal.morphologyPronominal.CasesA.O	140	123	119	0.022509
Nominal.morphologyGender.agreementPRED.ADJ	TENSEFutureFUT.AUX	73	63	40	0.022241
Nominal.morphologyDefiniteness.markingADJ.DEF	Nominal.morphologyNominal.casesO.case	35	102	25	0.0222078
Nominal.morphologyCase.markingCASE.ADJ	Word.orderNoun.relative.clauseNRel	68	110	57	0.0221124
Nominal.morphologyDefiniteness.markingN.DEF	Word.orderWH.elementWH.initial	33	92	22	0.0217937
Nominal.morphologyNominal.casesAGG.CASE.NR	Nominal.morphologyNominal.casesVOC	50	60	21	0.0217615
ALIGNMENTNoun..Simple.PastN.PST.Sa.So.	Nominal.morphologyNominal.casesVOC	140	60	58	0.0216683
ALIGNMENTCompare.PROG.PASTPAST_A.PROG_O	Verbal.morphologypresent.progressive..DATPROG.NO.DAT.AGR	11	129	10	0.0216112
ALIGNMENTPronoun..Simple.PastP.PST.A.Sa.	Word.orderClitic.pronouns.infinitive2nd.position	131	12	11	0.0213979
ALIGNMENTPronoun..Simple.PastP.PST..O.So.	Word.orderParticipleOV	37	75	21	0.0213912
ALIGNMENTPronoun..Simple.PastP.PST.A.O.	Nominal.morphologyDefiniteness.markingDEF.ART	19	61	8	0.021341
Nominal.morphologyGender...Noun.classNEUTR	Word.orderParticipleVO	56	59	25	0.0212615
ALIGNMENTNoun..Present.ProgressiveN.PROG.A.Sa.	Word.orderClitic.pronouns.infinitive2nd.position	143	12	12	0.020762
ALIGNMENTNoun..Simple.PastN.PST..O.So.	Nominal.morphologyPronominal.Cases.7.Cases	65	11	5	0.020762
ALIGNMENTNoun..Present.ProgressiveN.PROG.A.Sa.	Verbal.morphologysimple.PAST..APST.A.Gender.AGR	143	10	10	0.020762
ALIGNMENTNoun..Present.ProgressiveN.PROG.A.Sa.	TENSEFuturePERF.FUT	143	14	14	0.020762
ALIGNMENTNoun..Present.ProgressiveN.PROG.A.Sa.	TENSEFutureFUT.Particle	143	16	16	0.020762
ALIGNMENTNoun..Simple.PastN.PST..O.So.	Word.orderParticipleVO	65	59	29	0.0206459
ALIGNMENTVerb..Present.ProgressiveV.PROG.Sa.So.	Nominal.morphologyDefiniteness.markingDEF.LAST	145	9	9	0.0204785
ALIGNMENTCompare.PROG.PASTPAST_A.PROG_O	ALIGNMENTVerb..Present.ProgressiveV.PROG.Sa.So.	11	145	11	0.0204785
Nominal.morphologyNominal.casesVOC	Verbal.morphologysimple.PAST..APST.NO.A.AGR	60	29	12	0.0204785
ALIGNMENTVerb..Present.ProgressiveV.PROG.Sa.So.	Nominal.morphologyPronominal.CasesAGGL.CASE.NR	145	15	15	0.0204785
ALIGNMENTNoun..Simple.PastN.PST.Sa.So.	Verbal.morphologysimple.PAST..APST.NO.A.AGR	140	29	28	0.0204785
ALIGNMENTNoun..Simple.PastN.PST.A.O.	ALIGNMENTVerb..Present.ProgressiveV.PROG.Sa.So.	40	145	40	0.0204785
ALIGNMENTNoun..Present.ProgressiveN.PROG.A.O.	ALIGNMENTVerb..Present.ProgressiveV.PROG.Sa.So.	44	145	44	0.0204785
ALIGNMENTVerb..Present.ProgressiveV.PROG.Sa.So.	Word.orderNoun.adjectiveNA	145	45	45	0.0204785
ALIGNMENTVerb..Present.ProgressiveV.PROG.Sa.So.	Nominal.morphologyNominal.casesVOC	145	60	60	0.0204785
ALIGNMENTVerb..Present.ProgressiveV.PROG.Sa.So.	Nominal.morphologyDefiniteness.markingDEF.ART	145	61	61	0.0204785
ALIGNMENTVerb..Present.ProgressiveV.PROG.Sa.So.	Word.orderAdpositionsPrep	145	100	100	0.0204785
Word.orderClitic.pronouns.finite.verbVO	Word.orderNoun.PossessorN.Poss	29	58	12	0.0202014
ALIGNMENTNoun..Present.ProgressiveN.PROG.A.Sa.	ALIGNMENTVerb..Present.ProgressiveV.PROG.A.Sa.	143	142	140	0.020183
Verbal.morphologysimple.PAST..APST.A.AGR.FULL	Word.orderWH.elementWH.initial	59	92	39	0.0200627
ALIGNMENTNoun..Simple.PastN.PST.A.Sa.	Nominal.morphologyNominal.casesDAT	128	85	75	0.0200189
ALIGNMENTPronoun..Simple.PastP.PST.A.Sa.	Verbal.morphologypresent.progressive..APROG.NO.A.AGR	131	11	10	0.0199251
Nominal.morphologyPronominal.CasesA.O	Word.orderNoun.PossessorPoss.N	123	93	81	0.0194786
ALIGNMENTNoun..Simple.PastN.PST.Sa.So.	Verbal.morphologypresent.progressive..DATPROG.NO.DAT.AGR	140	129	127	0.019466
Verbal.morphologysimple.PAST..APST.NO.A.AGR	Word.orderNoun.relative.clauseRelN	29	23	5	0.0193028
ALIGNMENTPronoun..Simple.PastP.PST.A.O.	Nominal.morphologyCase.markingCASE.N	19	107	14	0.0190018
ALIGNMENTNoun..Simple.PastN.PST.Sa.So.	Nominal.morphologyPronominal.CasesAGGL.CASE	140	34	33	0.0189372
ALIGNMENTNoun..Simple.PastN.PST.Sa.So.	Word.orderMain.clausesV2	140	34	33	0.0189372
ALIGNMENTVerb..Present.ProgressiveV.PROG.A.Sa.	Word.orderNoun.adjectiveNA	142	45	44	0.0189124
Verbal.morphologypresent.progressive..OPROG.NO.O.AGR	Word.orderClitic.pronouns.infinitiveOV	127	21	19	0.0188575
Nominal.morphologyCase.markingCASE.ADJ	Verbal.morphologysimple.PAST..APST.A.AGR.FULL	68	59	28	0.018766
Nominal.morphologyPronominal.CasesA.O	Verbal.morphologysimple.PAST..OPST.O.Gender.AGR	123	13	11	0.0179738
Nominal.morphologyNominal.cases.7.Cases	Nominal.morphologyPronominal.CasesA.O	26	123	22	0.0179738
Nominal.morphologyPronominal.CasesAGGL.CASE	Verbal.morphologypresent.progressive..DATPROG.NO.DAT.AGR	34	129	31	0.0177683
ALIGNMENTNoun..Simple.PastN.PST.A.Sa.	ALIGNMENTVerb..Present.ProgressiveV.PROG.A.Sa.	128	142	125	0.0176687
ALIGNMENTNoun..Present.ProgressiveN.PROG.A.Sa.	Nominal.morphologyNominal.casesVOC	143	60	59	0.0175605
Nominal.morphologyPronominal.CasesOBL.Cases	Word.orderParticipleOV	65	75	37	0.0175376
Nominal.morphologyPronominal.CasesDAT.O	Verbal.morphologysimple.PAST..APST.A.AGR.FULL	74	59	30	0.0168071
Nominal.morphologyGender...Noun.classM.F	Verbal.morphologysimple.PAST..OPST.NO.O.AGR	101	111	77	0.016367
Nominal.morphologyGender...Noun.classNEUTR	Verbal.morphologysimple.PAST..OPST.O.Gender.AGR	56	13	5	0.0163491
ALIGNMENTNoun..Present.ProgressiveN.PROG.A.Sa.	Verbal.morphologysimple.PAST..OPST.NO.O.AGR	143	111	109	0.0161853
Word.orderClitic.pronouns.finite.verbVO	Word.orderNoun.relative.clauseNRel	29	110	24	0.0161528
Verbal.morphologypresent.progressive..OPROG.NO.O.AGR	Word.orderNoun.adjectiveAN	127	112	99	0.0160405
ALIGNMENTPronoun..Simple.PastP.PST.A.Sa.	Nominal.morphologyCase.markingCASE.ADJ	131	68	62	0.016036
Nominal.morphologyGender...Noun.classM.F	Word.orderNoun.relative.clauseNRel	101	110	83	0.0158946
ALIGNMENTVerb..Present.ProgressiveV.PROG..O.So.	Word.orderInfinitiveVO	13	53	5	0.0158391
Verbal.morphologysimple.PAST..DATPST.NO.DAT.AGR	Word.orderMain.clausesV2	126	34	30	0.0153819
Nominal.morphologyNominal.casesGEN.DAT	Word.orderInfinitiveOV	77	77	43	0.0152317
ALIGNMENTVerb..Present.ProgressiveV.PROG.A.Sa.	Nominal.morphologyNominal.casesGEN.DAT	142	77	75	0.0150679
ALIGNMENTNoun..Simple.PastN.PST.Sa.So.	Word.orderClitic.pronouns.finite.verbOV	140	30	29	0.0148886
ALIGNMENTNoun..Simple.PastN.PST.Sa.So.	Nominal.morphologyPreposition.agreementPRON.AGR	140	15	15	0.0141846
ALIGNMENTVerb..Present.ProgressiveV.PROG.A.Sa.	Word.orderClitic.pronouns.participle2nd.position	142	12	12	0.0139862
ALIGNMENTVerb..Present.ProgressiveV.PROG.A.Sa.	Word.orderSubordinate.clauseVSO	142	16	16	0.0139862
ALIGNMENTVerb..Present.ProgressiveV.PROG.A.Sa.	Nominal.morphologyDefiniteness.markingDEF.FIRST	142	34	34	0.0139862
ALIGNMENTVerb..Present.ProgressiveV.PROG.A.Sa.	Word.orderSubordinate.clauseSVO	142	57	57	0.0139862
ALIGNMENTVerb..Present.ProgressiveV.PROG.A.Sa.	Word.orderSubordinate.clauseV2	142	9	9	0.0139862
ALIGNMENTVerb..Present.ProgressiveV.PROG.A.Sa.	Word.orderNoun.PossessorN.Poss	142	58	58	0.0139862
ALIGNMENTNoun..Present.ProgressiveN.PROG.A.Sa.	Word.orderClitic.pronouns.infinitiveVO	143	20	20	0.0138891
ALIGNMENTNoun..Present.ProgressiveN.PROG.A.Sa.	Word.orderClitic.pronouns.infinitiveOV	143	21	21	0.0138891
ALIGNMENTNoun..Present.ProgressiveN.PROG.A.Sa.	Nominal.morphologyCase.markingCASE.ART	143	45	45	0.0138891
Nominal.morphologyNominal.casesAGGL.CASE	TENSEFutureFUT.Particle	45	16	5	0.0137933
TENSEFutureFUT.Particle	Word.orderNoun.adjectiveNA	16	45	5	0.0137933
ALIGNMENTNoun..Simple.PastN.PST.A.O.	Verbal.morphologysimple.PAST..DATPST.NO.DAT.AGR	40	126	35	0.0137933
ALIGNMENTVerb..Present.ProgressiveV.PROG.Sa.So.	Verbal.morphologypresent.progressive..APROG.A.Gender.AGR	145	5	5	0.0136988
ALIGNMENTVerb..Present.ProgressiveV.PROG.A.O.	ALIGNMENTVerb..Simple.PastV.PST.Sa.So.	9	145	9	0.0136988
ALIGNMENTVerb..Present.ProgressiveV.PROG.Sa.So.	Word.orderClitic.pronouns.finite.verb2nd.position	145	12	12	0.0136988
ALIGNMENTVerb..Present.ProgressiveV.PROG.Sa.So.	Word.orderMain.clausesVSO	145	12	12	0.0136988
ALIGNMENTVerb..Simple.PastV.PST.Sa.So.	Nominal.morphologyPronominal.CasesAGGL.CASE.NR	145	15	15	0.0136988
ALIGNMENTVerb..Present.ProgressiveV.PROG.Sa.So.	ALIGNMENTVerb..Simple.PastV.PST.A.O.	145	16	16	0.0136988
ALIGNMENTNoun..Simple.PastN.PST.Sa.So.	Word.orderClitic.pronouns.finite.verbVO	140	29	28	0.0136988
ALIGNMENTVerb..Present.ProgressiveV.PROG.Sa.So.	Word.orderClitic.pronouns.finite.verbVO	145	29	29	0.0136988
ALIGNMENTVerb..Present.ProgressiveV.PROG.Sa.So.	Nominal.morphologyDefiniteness.markingN.DEF	145	33	33	0.0136988
ALIGNMENTVerb..Present.ProgressiveV.PROG.Sa.So.	Word.orderMain.clausesV2	145	34	34	0.0136988
ALIGNMENTVerb..Present.ProgressiveV.PROG.Sa.So.	Nominal.morphologyDefiniteness.markingADJ.DEF	145	35	35	0.0136988
ALIGNMENTVerb..Present.ProgressiveV.PROG.Sa.So.	Word.orderMain.clausesSVO	145	50	50	0.0136988
ALIGNMENTVerb..Simple.PastV.PST.Sa.So.	Nominal.morphologyNominal.casesVOC	145	60	60	0.0136988
ALIGNMENTVerb..Simple.PastV.PST.Sa.So.	Nominal.morphologyDefiniteness.markingDEF.ART	145	61	61	0.0136988
ALIGNMENTCompare.PROG.PASTPROG_So.PST_So	ALIGNMENTVerb..Present.ProgressiveV.PROG.A.O.	146	9	9	0.0136057
ALIGNMENTCompare.PROG.PASTPROG_So.PST_So	Nominal.morphologyDefiniteness.markingDEF.LAST	146	9	9	0.0136057
ALIGNMENTNoun..Present.ProgressiveN.PROG.Sa.So.	Nominal.morphologyDefiniteness.markingDEF.LAST	146	9	9	0.0136057
ALIGNMENTCompare.PROG.PASTPROG_So.PST_So	ALIGNMENTVerb..Present.ProgressiveV.PROG..O.So.	146	13	13	0.0136057
ALIGNMENTCompare.PROG.PASTPROG_So.PST_So	Verbal.morphologysimple.PAST..OPST.O.Gender.AGR	146	13	13	0.0136057
ALIGNMENTNoun..Present.ProgressiveN.PROG.Sa.So.	Verbal.morphologysimple.PAST..OPST.O.Gender.AGR	146	13	13	0.0136057
ALIGNMENTPronoun..Simple.PastP.PST.Sa.So.	Verbal.morphologysimple.PAST..OPST.O.Gender.AGR	146	13	13	0.0136057
ALIGNMENTPronoun..Simple.PastP.PST.A.O.	ALIGNMENTPronoun..Simple.PastP.PST.Sa.So.	19	146	19	0.0136057
ALIGNMENTCompare.PROG.PASTPROG_So.PST_So	Verbal.morphologysimple.PAST..APST.NO.A.AGR	146	29	29	0.0136057
ALIGNMENTCompare.PROG.PASTPROG_So.PST_So	Word.orderNoun.adjectiveNA	146	45	45	0.0136057
ALIGNMENTNoun..Present.ProgressiveN.PROG.Sa.So.	Word.orderNoun.adjectiveNA	146	45	45	0.0136057
ALIGNMENTCompare.PROG.PASTPROG_So.PST_So	ALIGNMENTNoun..Present.ProgressiveN.PROG..O.So.	146	49	49	0.0136057
ALIGNMENTCompare.PROG.PASTPROG_So.PST_So	Nominal.morphologyGender...Noun.classNEUTR	146	56	56	0.0136057
ALIGNMENTNoun..Present.ProgressiveN.PROG.Sa.So.	Nominal.morphologyGender...Noun.classNEUTR	146	56	56	0.0136057
ALIGNMENTPronoun..Simple.PastP.PST.Sa.So.	Nominal.morphologyGender...Noun.classNEUTR	146	56	56	0.0136057
ALIGNMENTCompare.PROG.PASTPROG_So.PST_So	Nominal.morphologyDefiniteness.markingDEF.ART	146	61	61	0.0136057
ALIGNMENTNoun..Present.ProgressiveN.PROG.Sa.So.	Nominal.morphologyDefiniteness.markingDEF.ART	146	61	61	0.0136057
ALIGNMENTPronoun..Simple.PastP.PST.Sa.So.	Nominal.morphologyDefiniteness.markingDEF.ART	146	61	61	0.0136057
ALIGNMENTCompare.PROG.PASTPROG_So.PST_So	ALIGNMENTNoun..Simple.PastN.PST..O.So.	146	65	65	0.0136057
ALIGNMENTNoun..Present.ProgressiveN.PROG.Sa.So.	Word.orderAdpositionsPrep	146	100	100	0.0136057
ALIGNMENTPronoun..Simple.PastP.PST.Sa.So.	Word.orderAdpositionsPrep	146	100	100	0.0136057
ALIGNMENTCompare.PROG.PASTPROG_So.PST_So	Nominal.morphologyPronominal.CasesA.O	146	123	123	0.0136057
ALIGNMENTNoun..Present.ProgressiveN.PROG.Sa.So.	ALIGNMENTNoun..Simple.PastN.PST.Sa.So.	146	140	140	0.0136057
ALIGNMENTNoun..Simple.PastN.PST.Sa.So.	ALIGNMENTPronoun..Simple.PastP.PST.Sa.So.	140	146	140	0.0136057
ALIGNMENTCompare.PROG.PASTPAST_A.PROG_O	ALIGNMENTCompare.PROG.PASTPROG_So.PST_So	11	146	11	0.0136057
ALIGNMENTCompare.PROG.PASTPAST_A.PROG_O	ALIGNMENTNoun..Present.ProgressiveN.PROG.Sa.So.	11	146	11	0.0136057
ALIGNMENTCompare.PROG.PASTPAST_A.PROG_O	ALIGNMENTPronoun..Simple.PastP.PST.Sa.So.	11	146	11	0.0136057
ALIGNMENTCompare.PROG.PASTPROG_So.PST_So	Nominal.morphologyPronominal.CasesAGGL.CASE.NR	146	15	15	0.0136057
ALIGNMENTNoun..Present.ProgressiveN.PROG.Sa.So.	Nominal.morphologyPronominal.CasesAGGL.CASE.NR	146	15	15	0.0136057
ALIGNMENTPronoun..Simple.PastP.PST.Sa.So.	Nominal.morphologyPronominal.CasesAGGL.CASE.NR	146	15	15	0.0136057
ALIGNMENTCompare.PROG.PASTPROG_A.PST_O	ALIGNMENTNoun..Present.ProgressiveN.PROG.Sa.So.	30	146	30	0.0136057
ALIGNMENTCompare.PROG.PASTPROG_So.PST_So	ALIGNMENTNoun..Simple.PastN.PST.A.O.	146	40	40	0.0136057
ALIGNMENTNoun..Present.ProgressiveN.PROG.Sa.So.	ALIGNMENTNoun..Simple.PastN.PST.A.O.	146	40	40	0.0136057
ALIGNMENTNoun..Simple.PastN.PST.A.O.	ALIGNMENTPronoun..Simple.PastP.PST.Sa.So.	40	146	40	0.0136057
ALIGNMENTCompare.PROG.PASTPROG_So.PST_So	ALIGNMENTNoun..Present.ProgressiveN.PROG.A.O.	146	44	44	0.0136057
ALIGNMENTNoun..Present.ProgressiveN.PROG.A.O.	ALIGNMENTNoun..Present.ProgressiveN.PROG.Sa.So.	44	146	44	0.0136057
ALIGNMENTNoun..Present.ProgressiveN.PROG.Sa.So.	Nominal.morphologyNominal.casesVOC	146	60	60	0.0136057
ALIGNMENTPronoun..Simple.PastP.PST.Sa.So.	Nominal.morphologyNominal.casesVOC	146	60	60	0.0136057
ALIGNMENTNoun..Present.ProgressiveN.PROG.Sa.So.	Nominal.morphologyGender...Noun.classM.F	146	101	101	0.0136057
ALIGNMENTPronoun..Simple.PastP.PST.Sa.So.	Nominal.morphologyGender...Noun.classM.F	146	101	101	0.0136057
ALIGNMENTCompare.PROG.PASTPROG_So.PST_So	Verbal.morphologysimple.PAST..OPST.NO.O.AGR	146	111	111	0.0136057
Verbal.morphologypresent.progressive..DATPROG.NO.DAT.AGR	Word.orderNoun.adjectiveAN	129	112	101	0.013543
Nominal.morphologyDefiniteness.markingDEF.ART	Verbal.morphologypresent.progressive..DATPROG.NO.DAT.AGR	61	129	55	0.0133807
Nominal.morphologyCase.markingCASE.N	Nominal.morphologyGender...Noun.classM.F	107	101	74	0.013328
ALIGNMENTVerb..Simple.PastV.PST..O.So.	TENSEFutureFUT.Synth	32	68	15	0.0132392
ALIGNMENTPronoun..Simple.PastP.PST.A.Sa.	Nominal.morphologyPronominal.Cases.7.Cases	131	11	10	0.0130991
ALIGNMENTCompare.PROG.PASTPROG_A.PST_O	Word.orderNoun.adjectiveAN	30	112	23	0.0130102
Nominal.morphologyGender...Noun.classM.F	Verbal.morphologypresent.progressive..OPROG.NO.O.AGR	101	127	89	0.0129354
Nominal.morphologyGender...Noun.classM.F	Verbal.morphologypresent.progressive..DATPROG.NO.DAT.AGR	101	129	91	0.0126603
ALIGNMENTPronoun..Simple.PastP.PST.A.Sa.	TENSEFutureFUT.AUX	131	63	61	0.0125227
Verbal.morphologypresent.progressive..APROG.A.AGR.FULL	Word.orderSubordinate.clauseSOV	82	81	47	0.0120128
ALIGNMENTNoun..Present.ProgressiveN.PROG.A.Sa.	Word.orderNoun.adjectiveNA	143	45	44	0.0118948
Nominal.morphologyGender...Noun.classM.F	TENSEFutureFUT.AUX	101	63	47	0.0118733
ALIGNMENTPronoun..Simple.PastP.PST.A.Sa.	Nominal.morphologyPreposition.agreementPRON.AGR	131	15	14	0.0116369
ALIGNMENTNoun..Simple.PastN.PST.A.O.	Verbal.morphologypresent.progressive..DATPROG.NO.DAT.AGR	40	129	36	0.0115608
Nominal.morphologyNominal.casesGEN.DAT	Word.orderAdpositionsPost	77	57	30	0.011553
ALIGNMENTNoun..Present.ProgressiveN.PROG.A.Sa.	ALIGNMENTVerb..Simple.PastV.PST.A.Sa.	143	125	123	0.0114586
ALIGNMENTVerb..Present.ProgressiveV.PROG.Sa.So.	Verbal.morphologysimple.PAST..OPST.NO.O.AGR	145	111	110	0.0114287
ALIGNMENTVerb..Simple.PastV.PST.A.Sa.	Verbal.morphologypresent.progressive..APROG.A.AGR.FULL	125	82	71	0.0112998
Nominal.morphologyNominal.casesVOC	Word.orderAdpositionsPrep	60	100	41	0.0112696
ALIGNMENTNoun..Present.ProgressiveN.PROG.A.Sa.	ALIGNMENTPronoun..Simple.PastP.PST.A.Sa.	143	131	128	0.0112006
Nominal.morphologyPronominal.CasesA.O	Nominal.morphologyPronominal.CasesOBL.Cases	123	65	55	0.0111941
ALIGNMENTNoun..Simple.PastN.PST.Sa.So.	Word.orderNoun.PossessorN.Poss	140	58	57	0.0107791
Nominal.morphologyNominal.casesOBL.Cases	Nominal.morphologyPronominal.CasesA.O	75	123	63	0.0106745
Nominal.morphologyGender...Noun.classM.F	Verbal.morphologysimple.PAST..APST.NO.A.AGR	101	29	20	0.0105282
Nominal.morphologyPronominal.CasesAGGL.CASE.NR	Word.orderSubordinate.clauseSVO	15	57	6	0.0104713
ALIGNMENTPronoun..Simple.PastP.PST.A.Sa.	ALIGNMENTVerb..Present.ProgressiveV.PROG.A.Sa.	131	142	127	0.010375
ALIGNMENTNoun..Simple.PastN.PST..O.So.	ALIGNMENTVerb..Present.ProgressiveV.PROG.A.Sa.	65	142	63	0.0101327
Verbal.morphologysimple.PAST..OPST.NO.O.AGR	Word.orderParticipleVO	111	59	49	0.0100274
ALIGNMENTPronoun..Simple.PastP.PST.A.Sa.	Word.orderClitic.pronouns.finite.verbOV	131	30	27	0.00987475
ALIGNMENTNoun..Present.ProgressiveN.PROG.A.Sa.	Nominal.morphologyPronominal.CasesA.O	143	123	120	0.00967503
Nominal.morphologyGender...Noun.classM.F	Verbal.morphologysimple.PAST..DATPST.NO.DAT.AGR	101	126	88	0.00954101
Nominal.morphologyCase.markingCASE.N	Word.orderSubordinate.clauseVSO	107	16	12	0.00930239
Nominal.morphologyCase.markingCASE.ART	Verbal.morphologysimple.PAST..DATPST.NO.DAT.AGR	45	126	40	0.00906315
ALIGNMENTPronoun..Present.ProgressiveP.PROG.A.O.	Nominal.morphologyNominal.casesVOC	22	60	9	0.00904984
Nominal.morphologyNominal.casesVOC	Nominal.morphologyPronominal.CasesAGGL.CASE	60	34	14	0.00878483
Nominal.morphologyGender...Noun.classM.F	Nominal.morphologyNominal.casesGEN.DAT	101	77	53	0.00857825
ALIGNMENTNoun..Present.ProgressiveN.PROG..O.So.	ALIGNMENTVerb..Simple.PastV.PST.A.Sa.	49	125	42	0.00796817
ALIGNMENTNoun..Simple.PastN.PST.Sa.So.	Word.orderMain.clausesSVO	140	50	48	0.00796817
ALIGNMENTNoun..Present.ProgressiveN.PROG..O.So.	Word.orderWH.elementWH.initial	49	92	32	0.00795409
Nominal.morphologyGender.agreementPRED.ADJ	Word.orderClitic.pronouns.finite.verb2nd.position	73	12	7	0.00795146
ALIGNMENTNoun..Simple.PastN.PST..O.So.	Nominal.morphologyDefiniteness.markingDEF.ART	65	61	27	0.00778801
ALIGNMENTPronoun..Simple.PastP.PST.A.Sa.	Word.orderClitic.pronouns.participle2nd.position	131	12	11	0.0076046
ALIGNMENTVerb..Present.ProgressiveV.PROG.A.Sa.	Nominal.morphologyNominal.casesVOC	142	60	58	0.00748366
Nominal.morphologyPronominal.CasesAGGL.CASE	Verbal.morphologypresent.progressive..OPROG.NO.O.AGR	34	127	30	0.00747671
Verbal.morphologypresent.progressive..OPROG.NO.O.AGR	Word.orderMain.clausesV2	127	34	30	0.00747671
Nominal.morphologyNominal.casesVOC	Word.orderSubordinate.clauseSOV	60	81	34	0.00738011
Verbal.morphologypresent.progressive..OPROG.NO.O.AGR	Word.orderWH.elementWH.initial	127	92	84	0.00706254
ALIGNMENTNoun..Present.ProgressiveN.PROG.A.Sa.	Word.orderSubordinate.clauseV2	143	9	9	0.00696867
ALIGNMENTNoun..Present.ProgressiveN.PROG.A.Sa.	Word.orderClitic.pronouns.participle2nd.position	143	12	12	0.00696867
ALIGNMENTNoun..Present.ProgressiveN.PROG.A.Sa.	Word.orderSubordinate.clauseVSO	143	16	16	0.00696867
ALIGNMENTNoun..Present.ProgressiveN.PROG.A.Sa.	Word.orderClitic.pronouns.participleVO	143	24	24	0.00696867
ALIGNMENTNoun..Present.ProgressiveN.PROG.A.Sa.	Word.orderClitic.pronouns.participleOV	143	28	28	0.00696867
ALIGNMENTNoun..Present.ProgressiveN.PROG.A.Sa.	Nominal.morphologyDefiniteness.markingDEF.FIRST	143	34	34	0.00696867
ALIGNMENTNoun..Present.ProgressiveN.PROG.A.Sa.	Word.orderSubordinate.clauseSVO	143	57	57	0.00696867
ALIGNMENTNoun..Present.ProgressiveN.PROG.A.Sa.	Word.orderNoun.PossessorN.Poss	143	58	58	0.00696867
Nominal.morphologyCase.markingCASE.ART	Word.orderNoun.adjectiveAN	45	112	35	0.00692044
ALIGNMENTVerb..Simple.PastV.PST.Sa.So.	Word.orderClitic.pronouns.finite.verb2nd.position	145	12	12	0.00691916
ALIGNMENTVerb..Simple.PastV.PST.Sa.So.	Word.orderMain.clausesVSO	145	12	12	0.00691916
ALIGNMENTVerb..Simple.PastV.PST.A.O.	ALIGNMENTVerb..Simple.PastV.PST.Sa.So.	16	145	16	0.00691916
ALIGNMENTVerb..Simple.PastV.PST.Sa.So.	Word.orderClitic.pronouns.finite.verbVO	145	29	29	0.00691916
ALIGNMENTVerb..Simple.PastV.PST.Sa.So.	Word.orderClitic.pronouns.finite.verbOV	145	30	30	0.00691916
ALIGNMENTVerb..Simple.PastV.PST.Sa.So.	Word.orderMain.clausesV2	145	34	34	0.00691916
ALIGNMENTVerb..Simple.PastV.PST.Sa.So.	Nominal.morphologyDefiniteness.markingADJ.DEF	145	35	35	0.00691916
ALIGNMENTVerb..Simple.PastV.PST.Sa.So.	Verbal.morphologypresent.progressive..APROG.A.Gender.AGR	145	5	5	0.00691916
ALIGNMENTVerb..Present.ProgressiveV.PROG.Sa.So.	Verbal.morphologypresent.progressive..DATPROG.DAT.AGR.FULL	145	9	9	0.00687288
ALIGNMENTVerb..Present.ProgressiveV.PROG.Sa.So.	Verbal.morphologysimple.PAST..APST.A.Gender.AGR	145	10	10	0.00687288
ALIGNMENTVerb..Present.ProgressiveV.PROG.Sa.So.	Nominal.morphologyCase.markingCASE.ADJ	145	68	68	0.00687288
ALIGNMENTVerb..Present.ProgressiveV.PROG.Sa.So.	Verbal.morphologypresent.progressive..OPROG.O.AGR.FULL	145	7	7	0.00687288
ALIGNMENTVerb..Present.ProgressiveV.PROG.Sa.So.	Word.orderClitic.pronouns.infinitive2nd.position	145	12	12	0.00687288
ALIGNMENTVerb..Present.ProgressiveV.PROG.Sa.So.	TENSEFutureFUT.Particle	145	16	16	0.00687288
ALIGNMENTCompare.PROG.PASTPROG_So.PST_So	Verbal.morphologypresent.progressive..APROG.A.Gender.AGR	146	5	5	0.00682597
ALIGNMENTNoun..Present.ProgressiveN.PROG.Sa.So.	Verbal.morphologypresent.progressive..APROG.A.Gender.AGR	146	5	5	0.00682597
ALIGNMENTPronoun..Simple.PastP.PST.Sa.So.	Verbal.morphologypresent.progressive..APROG.A.Gender.AGR	146	5	5	0.00682597
[truncated: 2,548 more rows]
